# Supplementary material for: A dynamic H3K27ac signature identifies VEGFA-stimulated endothelial enhancers and requires EP300 activity
Source: HighWire-hosted journal article supplement (doi:10.1101/gr.149674.112), 2013-04-01
Supplement: Zhang_ST-01_NGS_data_summary.xlsx [file Zhang_ST-01_NGS_data_summary.xlsx]

## Sheet: data-table
Sample	Hour	Name	Aligned Reads	Input
DHS, Rep 1	0	DHS_00hour_rep1	36316278	NA
DHS, Rep 2	0	DHS_00hour_rep2	45412282	NA
DHS, Rep 1	1	DHS_01hour_rep1	40713174	NA
DHS, Rep 2	1	DHS_01hour_rep2	37735921	NA
DHS, Rep 1	4	DHS_04hour_rep1	35520602	NA
DHS, Rep 2	4	DHS_04hour_rep2	46822013	NA
DHS, Rep 1	12	DHS_12hour_rep1	45447349	NA
DHS, Rep 2	12	DHS_12hour_rep2	31081327	NA
ETS1	0	ETS1_00h	8556372	ETS1 Input
ETS1	1	ETS1_01h	9760754	ETS1 Input
ETS1	4	ETS1_04h	7848015	ETS1 Input
ETS1	12	ETS1_12h	9998161	ETS1 Input
H3K27ac	0	H3K27Ac_00h	15015163	Histone Input
H3K27ac	1	H3K27Ac_01h	21774475	Histone Input
H3K27ac	4	H3K27Ac_04h	25607692	Histone Input
H3K27ac	12	H3K27Ac_12h	36499727	Histone Input
ETS1 Input		ETS1_input_hour0	27142686	NA
Histone Input		histone_input_4hour_rep1 AND histone_input_4hour_rep2	28751932	NA
p300 Input		p300_input	7538893	NA
p300, rep1	0	p300_00h_rep1	5794835	p300 Input
p300, rep2	0	p300_00h_rep2	20973349	p300 Input
p300, rep1	1	p300_01h_rep1	7418396	p300 Input
p300, rep2	1	p300_01h_rep2	18092115	p300 Input
p300, rep1	4	p300_04h_rep1	6543974	p300 Input
p300, rep2	4	p300_04h_rep2	13948102	p300 Input
p300, rep1	12	p300_12h_rep1	8514903	p300 Input
p300, rep2	12	p300_12h_rep2	22027139	p300 Input
H3K27ac C646-treated	0	H3K27Ac_C646_00h	13094746	C646 Input
H3K27ac C646-treated	1	H3K27Ac_C646_01h	19368671	C646 Input
H3K27ac C646-treated	4	H3K27Ac_C646_04h	10738022	C646 Input
C646 Input		C646_input	26108937	NA

## Sheet: DV-IDENTITY-0
#VALUE!	#VALUE!	#VALUE!	#VALUE!	#REF!	#VALUE!	#VALUE!	#REF!	#REF!	#REF!	#REF!	#REF!	#REF!	#REF!	#REF!	#REF!	#REF!	#REF!	#REF!	#REF!	#REF!	#REF!	#REF!	#REF!	#REF!	#REF!	#REF!	#REF!	#REF!	#REF!	#REF!	#REF!	#REF!	#REF!	#REF!	#REF!	#REF!	#REF!	#REF!	#REF!	#REF!	#REF!	0	#VALUE!	#VALUE!	#VALUE!	#REF!	#VALUE!	#VALUE!	0
#REF!	#REF!	#REF!	#REF!	#REF!	#REF!	#REF!	#REF!	#REF!	#REF!	0	#VALUE!	#VALUE!	#VALUE!	#REF!	#VALUE!	#VALUE!	0	#VALUE!	#VALUE!	#VALUE!	#REF!	#VALUE!	#VALUE!	0	#VALUE!	#VALUE!	#VALUE!	#REF!	#VALUE!	#VALUE!	0	#VALUE!	#VALUE!	#VALUE!	#REF!	#VALUE!	#VALUE!	0	#VALUE!	#VALUE!	#VALUE!	#REF!	#VALUE!	#VALUE!	0	#VALUE!	#VALUE!	#VALUE!	#REF!
#REF!	#REF!	#REF!	#REF!	#VALUE!	#VALUE!	#VALUE!	#VALUE!	#VALUE!	#REF!	#VALUE!	0	#VALUE!	#VALUE!	#VALUE!	#VALUE!	#REF!	#VALUE!	0	#VALUE!	#VALUE!	#VALUE!	#VALUE!	#REF!	#VALUE!	#REF!	#REF!	#REF!	#REF!	#REF!	#REF!	#REF!	#REF!	#REF!	#REF!	#REF!	#REF!	#REF!	#REF!	#REF!	#REF!	#REF!	#REF!	#REF!	#REF!	#REF!	#REF!	0	#VALUE!	0
#VALUE!	#VALUE!	#VALUE!	#VALUE!	#VALUE!	#VALUE!	0	#VALUE!	#VALUE!	#VALUE!	#VALUE!	#VALUE!	0	#VALUE!	#VALUE!	#VALUE!	#VALUE!	#VALUE!	0	#VALUE!	#VALUE!	#VALUE!	#VALUE!	#VALUE!
[truncated: 206 more columns]

## Sheet: legend
Suppl. Table 1. Summary of NGS data.
The table summarizes the NGS data used in this manuscript. The number of aligned reads are indicated. Different input chromatin samples were used based on the batch of chromatin used for ChIP.
