# Supplementary material for: A dynamic H3K27ac signature identifies VEGFA-stimulated endothelial enhancers and requires EP300 activity
Source: HighWire-hosted journal article supplement (doi:10.1101/gr.149674.112), 2013-04-01
Supplement: Zhang_ST-02_DE_dynamic_sites_and_nearest_gene.xlsx [file Zhang_ST-02_DE_dynamic_sites_and_nearest_gene.xlsx]

## Sheet: Table
	Chromosome	Start	End	Hour 0 Enrichment	Hour 1 Enrichment	Hour 4 Enrichment	Hour 12 Enrichment	log2 Variance Score	Cluster	Annotation	Ensembl ID	HGNC ID	Hour 0 FPKM	Hour 1 FPKM	Hour 4 FPKM	Hour 12 FPKM
1	chr21	39812100	39812299	134.076	141.669	73.5393	59.1318	4.09929	H1	intron	NA	NA	NA	NA	NA	NA
2	chr21	46293100	46293299	106.06	111.41	59.5318	47.7915	3.67728	H1	intron	ENSG00000183255	PTTG1IP	325.072	299.747	311.455	301.032
3	chr14	21737150	21737349	550.313	565.302	372.366	328.06	5.01986	H1	intron	ENSG00000092199	HNRNPC	1069.9	1008.09	916.527	692.149
4	chr2	114647800	114647999	126.072	130.666	57.1973	41.3113	4.58528	H1	promoter	ENSG00000115091	ACTR3	228.42	236.162	244.947	245.538
5	chr1	145477100	145477299	86.0489	89.403	38.5206	28.3509	4.04728	H1	promoter	ENSG00000131795	RBM8A	70.4712	74.241	76.3532	50.791
6	chr12	102270650	102270849	150.085	155.424	96.8852	81.8125	3.5138	H1	promoter	ENSG00000136048	DRAM1	28.2726	30.3857	27.7011	40.3334
7	chr6	139696150	139696349	286.163	295.718	178.596	146.615	4.64547	H1	intergenic	ENSG00000164442	CITED2	21.147	85.04	30.6894	25.4796
8	chr2	152684800	152684999	70.0398	72.8978	33.8514	23.4907	3.65288	H1	intron	ENSG00000162980	ARL5A	20.8113	20.0931	21.7312	30.1628
9	chr2	128395900	128396099	174.099	177.431	108.558	89.9128	3.87115	H1	promoter	ENSG00000144230	GPR17	0.736151	0.432445	0.983743	0.454128
10	chr5	136695900	136696099	36.4207	37.1366	15.1748	9.88231	3.02572	H1	intron	NA	NA	NA	NA	NA	NA
11	chr4	170584450	170584649	94.0535	97.6556	47.8589	31.591	4.01562	H1	intron	ENSG00000109572	CLCN3	52.7381	52.7827	50.4969	56.5622
12	chr8	67976550	67976749	54.0307	56.3927	26.8477	17.0105	3.32416	H1	promoter	NA	NA	NA	NA	NA	NA
13	chr3	58069200	58069399	202.115	207.69	143.577	122.314	3.41873	H1	intron	ENSG00000136068	FLNB	311.583	320.469	308.696	246.407
14	chr11	57092000	57092199	54.0307	56.3927	29.1823	20.2506	3.02016	H1	intron	ENSG00000149115	TNKS1BP1	76.5352	76.7746	78.2663	100.379
15	chr14	73130900	73131099	151.419	158.175	85.9904	64.532	4.25283	H1	intergenic	NA	NA	NA	NA	NA	NA
16	chr14	77786800	77786999	138.078	141.669	89.8814	73.7123	3.40006	H1	promoter	ENSG00000009830	POMT2	19.5999	18.9551	21.0385	18.3317
17	chr2	112813200	112813399	218.124	224.195	124.9	94.773	4.69554	H1	promoter	ENSG00000153214	TMEM87B	24.1848	23.7849	23.2762	30.3683
18	chr5	32098100	32098299	222.126	224.195	152.915	130.414	3.65571	H1	intron	ENSG00000224282	CTD-2290C23.1	2.28401	3.62516	1.7281	2.47101
19	chr12	3227000	3227199	86.0489	86.6521	50.1935	38.0712	3.24533	H1	intron	ENSG00000011105	TSPAN9	47.4007	51.983	51.9863	57.1875
20	chr8	1734200	1734399	298.169	303.97	190.268	149.855	4.67049	H1	exon	ENSG00000253982	CTD-2336O2.1	16.4773	13.2464	12.4301	10.0664
21	chr12	52541400	52541599	144.749	146.254	87.5468	66.1521	3.88955	H1	intergenic	ENSG00000167767	KRT80	12.3246	10.7627	6.82502	6.40645
22	chr1	25050700	25050899	202.115	215.943	113.227	98.0131	4.5301	H1	intergenic	ENSG00000169504	CLIC4	204.028	192.396	223.257	152.904
23	chr17	27918000	27918199	98.0557	108.659	38.5206	28.3509	4.60602	H1	intergenic	ENSG00000198720	ANKRD13B	10.7284	9.55596	10.0299	9.19982
24	chr13	52529250	52529449	18.0102	20.6315	3.50187	0.810025	3.22726	H1	intron	ENSG00000236044	FABP5P2	5.58998	4.62706	5.40298	10.7887
25	chr1	223895950	223896149	178.101	193.936	99.2197	85.0526	4.43734	H1	intron	ENSG00000162909	CAPN2	206.514	173.447	193.984	117.507
26	chr20	3793200	3793399	30.0171	34.3858	8.17104	4.05013	3.60398	H1	intergenic	ENSG00000125843	C20orf29	10.0086	8.9335	8.40706	8.40054
27	chr17	58485800	58485999	30.0171	34.3858	8.17104	4.05013	3.60398	H1	intergenic	ENSG00000141371	C17orf64	0.0961823	0	0	0
28	chr3	174159250	174159449	52.6966	59.1435	24.5131	19.1706	3.3585	H1	intergenic	ENSG00000177694	NAALADL2	2.91344	2.00353	3.87842	2.12169
29	chr22	46481550	46481749	78.0444	86.6521	38.5206	31.591	3.70563	H1	promoter	ENSG00000182257	C22orf26	0.0710467	0.268893	0.165353	0.339413
30	chr4	87928450	87928649	150.085	160.925	99.2197	89.9128	3.34655	H1	promoter	NA	NA	NA	NA	NA	NA
31	chr20	39657800	39657999	74.0421	81.1504	40.8552	34.8311	3.22913	H1	promoter	ENSG00000124181	PLCG1	81.5208	84.4593	100.969	94.7408
32	chr22	39915750	39915949	182.103	199.437	113.227	99.6331	4.04443	H1	promoter	ENSG00000128272	ATF4	232.41	251.411	303.456	162.508
33	chr19	48233100	48233299	128.74	142.586	78.9867	68.3121	3.67078	H1	intron	ENSG00000105373	GLTSCR2	70.2459	71.1836	64.0061	60.8122
34	chr5	134094700	134094899	98.0557	108.659	59.5318	51.0316	3.33642	H1	promoter	ENSG00000145833	DDX46	74.6988	56.3153	69.0686	58.0154
35	chr17	38175300	38175499	282.16	303.97	180.93	167.675	4.36343	H1	promoter	ENSG00000108342	CSF3	1.03726	1.22317	0.222077	0.212365
36	chr22	46449250	46449449	210.119	229.697	129.569	117.454	4.2136	H1	intron	ENSG00000197182	MIR4763	0.231726	0	0	0.0954375
37	chr14	64970050	64970249	166.094	180.181	108.558	99.6331	3.56038	H1	intron	ENSG00000089775	ZBTB25	2.90686	3.53506	2.62284	3.86847
38	chr15	75165450	75165649	282.16	306.721	183.265	167.675	4.37022	H1	intron	ENSG00000140497	SCAMP2	39.93	35.2118	38.2445	43.0683
39	chr16	578450	578649	114.065	119.662	54.8627	44.5514	4.19581	H1	promoter	ENSG00000103326	SOLH	6.63043	5.48476	6.30254	5.71674
40	chr21	27542900	27543099	90.0512	94.9047	43.1898	34.8311	3.88081	H1	exon	ENSG00000142192	APP	575.732	544.592	640.493	581.056
41	chr5	16935950	16936149	250.142	259.956	134.238	114.214	4.9317	H1	exon	ENSG00000145555	MYO10	54.2387	61.1007	56.0821	76.4994
42	chr16	22037450	22037649	54.0307	56.3927	26.8477	21.8707	3.01832	H1	intron	ENSG00000185716	C16orf52	5.44208	4.94435	4.75601	5.52875
43	chr19	3968150	3968349	58.033	61.8944	29.1823	23.4907	3.15672	H1	intron	ENSG00000167657	DAPK3	46.7426	43.0278	50.1071	43.5087
44	chr16	86963850	86964049	278.158	298.468	134.238	106.113	5.55826	H1	intergenic	NA	NA	NA	NA	NA	NA
45	chr19	58951200	58951399	114.065	119.662	73.5393	65.612	3.02934	H1	exon	ENSG00000131849	ZNF132	1.1859	0.802552	1.3596	1.71648
46	chr19	42757650	42757849	134.076	141.669	68.8702	57.5118	4.23284	H1	intron	ENSG00000105722	ERF	55.4093	49.2826	53.9977	52.3723
47	chr5	72144200	72144399	194.11	202.188	124.9	112.594	3.75398	H1	exon	ENSG00000083312	TNPO1	243.753	249.249	316.25	243.745
48	chr3	185655450	185655649	190.108	198.52	121.787	112.053	3.70127	H1	intron	ENSG00000136527	TRA2B	335.496	328.9	296.697	218.705
49	chr12	111882700	111882899	202.115	210.441	134.238	123.934	3.58729	H1	intron	ENSG00000238168	RP11-686G8.1	1.52483	1.23805	1.23619	0.913138
50	chr1	156095700	156095899	198.113	207.69	120.231	107.733	4.07852	H1	promoter	ENSG00000196189	SEMA4A	0.350388	0.476643	1.29146	0.810168
51	chr1	159649250	159649449	106.06	116.912	50.1935	33.211	4.46445	H1	intergenic	ENSG00000132693	CRP	0.187769	0	0	0
52	chr12	20522200	20522399	58.033	64.6452	22.1785	12.1504	4.10302	H1	promoter	ENSG00000131982	UBE2L2	0.577335	1.3177	0.511505	0.252873
53	chr17	78734400	78734599	122.069	127.915	78.2085	65.612	3.30254	H1	intron	NA	NA	NA	NA	NA	NA
54	chr1	153540050	153540249	250.142	265.458	155.25	127.174	4.55859	H1	intergenic	ENSG00000196754	S100A2	7.12481	5.90529	4.82805	2.43635
55	chr19	55628250	55628449	158.09	171.929	71.2048	47.7915	5.09407	H1	intron	ENSG00000125503	PPP1R12C	15.0637	17.1367	18.5046	15.7285
56	chr16	67881200	67881399	98.0557	105.908	52.5281	41.3113	3.80673	H1	promoter	ENSG00000102898	NUTF2	98.5592	93.741	99.3822	96.5604
57	chr11	107880200	107880399	190.108	199.437	138.908	125.554	3.04351	H1	promoter	ENSG00000075239	ACAT1	109.221	101.453	86.5729	91.7853
58	chr12	12869700	12869899	254.144	270.96	150.581	127.174	4.7055	H1	promoter	ENSG00000111276	CDKN1B	18.9347	15.5396	17.6148	16.8938
59	chr2	10545300	10545499	202.115	218.693	110.893	89.9128	4.73993	H1	intron	ENSG00000115758	ODC1	68.2092	71.8769	71.4161	49.7398
60	chr3	58037500	58037699	358.204	386.496	222.953	191.976	5.01219	H1	intron	ENSG00000136068	FLNB	311.583	320.469	308.696	246.407
61	chr12	122906400	122906599	198.113	210.441	136.573	122.314	3.52882	H1	intron	ENSG00000130779	CLIP1	23.0931	29.3859	24.8836	27.8981
62	chr14	74960700	74960899	74.0421	83.9013	31.5169	20.2506	4.21966	H1	promoter	ENSG00000119655	NPC2	614.158	519.49	741.326	566.919
63	chr21	38738250	38738449	138.078	147.171	94.5506	83.4326	3.10038	H1	intergenic	NA	NA	NA	NA	NA	NA
64	chr14	64194650	64194849	50.0284	50.8909	17.5094	17.0105	3.44038	H1	exon	ENSG00000126821	SGPP1	2.5463	2.55052	2.31274	2.70149
65	chr6	31462550	31462749	110.063	111.41	61.8664	60.7519	3.24375	H1	intergenic	ENSG00000204516	MICB	38.0816	29.034	34.5483	29.4511
66	chr17	80416150	80416349	182.103	185.683	122.566	122.314	3.04139	H1	promoter	ENSG00000141562	NARF	35.8185	33.7051	39.8789	30.2457
67	chr20	23330900	23331099	302.172	309.472	183.265	180.636	4.39321	H1	promoter	ENSG00000132661	NXT1	12.4027	12.2281	12.5533	9.6368
68	chr12	120670500	120670699	274.156	279.212	162.253	159.575	4.35357	H1	intron	ENSG00000240925	RPS20P31	0	0.229593	0	0.399116
69	chr17	21221850	21222049	14.008	15.1297	1.16729	0.810025	2.98777	H1	intergenic	ENSG00000034152	MAP2K3	17.9872	18.7651	29.5753	18.2337
70	chr6	151561850	151562049	38.0216	39.8875	12.8402	12.1504	3.18542	H1	promoter	ENSG00000131016	AKAP12	53.4014	94.4952	104.328	108.384
71	chr8	38240000	38240199	278.158	284.714	157.584	153.095	4.60392	H1	intergenic	ENSG00000147535	PPAPDC1B	57.1017	65.6419	65.4367	63.8171
72	chr19	42758700	42758899	138.078	144.42	45.5244	41.3113	5.11507	H1	intron	ENSG00000105722	ERF	55.4093	49.2826	53.9977	52.3723
73	chr10	89396200	89396399	38.0216	39.8875	12.8402	13.7704	3.07385	H1	intergenic	ENSG00000198682	PAPSS2	59.4891	45.0931	69.843	50.7137
74	chr19	935500	935699	38.0216	39.8875	12.8402	13.7704	3.07385	H1	intron	ENSG00000116017	ARID3A	1.49197	1.35804	1.18601	1.76085
75	chr19	1862600	1862799	102.058	108.659	36.186	38.0712	4.4523	H1	intron	ENSG00000129911	KLF16	8.36626	7.91271	7.34568	7.33104
76	chr12	52463800	52463999	142.081	147.171	85.2122	86.6727	3.32161	H1	promoter	ENSG00000123395	C12orf44	19.7273	22.4628	23.5382	15.9691
77	chr15	60690600	60690799	238.135	246.202	143.577	146.615	4.02554	H1	intergenic	ENSG00000182718	ANXA2	1490.23	1295.87	1275.56	1235.61
78	chr19	46459700	46459899	214.122	221.444	134.238	136.894	3.67926	H1	intron	ENSG00000104967	NOVA2	7.5666	7.63106	7.12209	8.01392
79	chr15	67053950	67054149	88.7171	91.2369	46.3025	48.8715	3.12757	H1	intron	ENSG00000137834	SMAD6	1.81642	1.2625	0.547162	1.88221
80	chr5	148442600	148442799	222.126	229.697	136.573	141.754	3.78854	H1	exon	ENSG00000169247	SH3TC2	2.57254	3.42989	2.39113	2.43718
81	chr11	35641050	35641249	114.065	119.662	54.8627	57.5118	3.83361	H1	exon	ENSG00000179431	FJX1	8.52894	16.195	5.59508	7.66652
82	chr14	62031000	62031199	107.394	111.41	59.5318	61.8319	3.22433	H1	intergenic	ENSG00000182107	TMEM30B	0.493081	0.271436	0.183425	0.335333
83	chr19	50379550	50379749	410.233	416.755	255.637	266.498	4.52615	H1	promoter	ENSG00000104946	TBC1D17	12.0469	11.1152	13.0545	13.8416
84	chr6	36098850	36099049	96.7216	98.5725	36.9642	41.3113	4.06516	H1	promoter	ENSG00000156711	MAPK13	4.70006	5.35883	6.28521	5.09177
85	chr8	145027200	145027399	50.0284	50.8909	12.8402	15.3905	3.7734	H1	intron	ENSG00000178209	PLEC	25.5761	25.8266	25.0144	19.6667
86	chr21	34752400	34752599	122.069	122.413	66.5356	70.4722	3.33914	H1	intergenic	ENSG00000159128	IFNGR2	33.0927	30.7246	38.4721	43.6262
87	chr3	46989150	46989349	198.113	199.437	129.569	133.654	3.18917	H1	intron	ENSG00000160796	NBEAL2	35.6245	32.9488	27.3686	23.9694
88	chrX	153665650	153665849	58.033	59.1435	12.8402	15.3905	4.18361	H1	promoter	ENSG00000203879	GDI1	77.5959	77.6168	90.5322	82.5985
89	chr1	45273800	45273999	287.497	292.05	184.043	186.036	3.94662	H1	promoter	ENSG00000222009	BTBD19	30.5795	37.4682	40.303	28.3715
90	chr5	163186100	163186299	74.0421	75.6487	33.8514	34.8311	3.32593	H1	intergenic	ENSG00000224012	RP11-756G12.1	13.7496	16.0657	14.728	17.5492
91	chr9	75192650	75192849	198.113	199.437	117.896	119.074	3.76016	H1	intron	ENSG00000165091	TMC1	0.686604	0.191206	0.497777	1.02927
92	chr3	50281300	50281499	302.172	303.97	185.599	188.736	4.19196	H1	intron	ENSG00000230454	U73166.2	0.711929	0.776512	1.30731	0.585385
93	chr3	73046450	73046649	138.078	138.918	85.2122	86.6727	3.03715	H1	promoter	NA	NA	NA	NA	NA	NA
94	chr1	59250350	59250549	294.167	309.472	194.938	191.976	3.99725	H1	promoter	ENSG00000234807	RP4-794H19.2	0.0527467	0.0202505	0.240665	0.0806868
95	chr9	33816700	33816899	350.199	367.24	243.964	240.577	3.92691	H1	promoter	ENSG00000107341	UBE2R2	38.1509	36.1578	36.378	43.8312
96	chr11	85375450	85375649	174.099	188.434	80.5431	75.3323	4.79492	H1	exon	ENSG00000171202	TMEM126A	98.4035	89.4297	77.0327	81.6221
97	chr5	79703900	79704099	150.085	158.175	92.216	89.9128	3.44759	H1	promoter	ENSG00000039319	ZFYVE16	10.9418	9.26706	7.33163	13.0842
98	chr7	158622150	158622349	18.0102	20.6315	3.50187	2.43008	3.02168	H1	exon	ENSG00000117868	ESYT2	22.714	21.2008	32.0277	29.2162
99	chr10	33246700	33246899	78.0444	83.9013	43.1898	41.3113	3.03818	H1	exon	ENSG00000228816	AK3P5	0.589935	0.273989	0.758797	0.18873
100	chrX	68151750	68151949	62.0353	67.3961	31.5169	29.9709	3.03008	H1	intergenic	NA	NA	NA	NA	NA	NA
101	chr19	41768700	41768899	66.0375	72.8978	26.8477	25.1108	3.74251	H1	promoter	ENSG00000105323	HNRNPUL1	126.036	120.229	109.748	118.03
102	chr17	16188700	16188899	54.0307	61.8944	12.8402	8.91028	4.44937	H1	intron	ENSG00000225436	AC005971.3	1.38332	1.38051	0.950733	1.25356
103	chr20	60936350	60936549	86.0489	97.6556	29.1823	23.4907	4.62544	H1	intron	ENSG00000130702	LAMA5	38.1137	29.1478	29.6809	23.9597
104	chr22	19842950	19843149	170.097	182.932	94.5506	86.6727	4.22493	H1	intergenic	ENSG00000185838	GNB1L	4.20562	2.45737	3.07527	2.28976
105	chr14	77384100	77384299	142.081	152.673	82.8777	76.9524	3.76179	H1	intergenic	ENSG00000241081	RP11-488C13.1	100.504	93.6785	94.7708	120.042
106	chr6	89790750	89790949	190.108	199.437	129.569	123.934	3.28048	H1	promoter	ENSG00000146278	PNRC1	44.6444	60.0092	60.1829	63.0002
107	chr1	151171150	151171349	63.3693	68.3131	31.5169	28.8909	3.15772	H1	promoter	ENSG00000143398	PIP5K1A	118.227	117.133	105.705	93.459
108	chr14	103058500	103058699	238.135	248.953	162.253	156.335	3.56956	H1	promoter	ENSG00000089902	RCOR1	15.4692	20.2874	17.753	17.4621
109	chr12	124068350	124068549	106.06	111.41	64.201	60.7519	3.0723	H1	promoter	ENSG00000086598	TMED2	186.555	168.859	228.095	210.145
110	chr2	239077200	239077399	50.0284	53.6418	22.1785	20.2506	3.10993	H1	intergenic	ENSG00000178752	FAM132B	0.466763	0.0937258	0.687873	0.299009
111	chr13	45915000	45915199	182.103	188.434	127.235	120.694	3.03415	H1	promoter	ENSG00000170919	XXyac-R12DG2.2	15.3783	19.2486	22.0303	16.1564
112	chr15	90578650	90578849	118.067	125.164	70.4266	65.072	3.37215	H1	intron	ENSG00000140548	ZNF710	11.5948	11.593	15.3689	18.9727
113	chr17	75136250	75136449	258.147	268.209	183.265	174.155	3.44667	H1	intron	ENSG00000129657	SEC14L1	139.791	153.945	148.183	164.464
114	chr8	42397100	42397299	162.092	171.929	89.8814	88.2927	3.9942	H1	exon	ENSG00000168575	SLC20A2	14.1304	20.0742	16.8519	16.3414
115	chr1	153585100	153585299	90.0512	94.9047	50.1935	49.4115	3.10265	H1	intron	ENSG00000188643	S100A16	593.474	609.492	613.986	513.001
116	chr19	3428300	3428499	130.074	136.168	80.5431	80.1925	3.12901	H1	intron	ENSG00000095932	C19orf77	0.101646	0	0	0
117	chr3	11556750	11556949	34.0193	37.1366	8.17104	8.91028	3.47557	H1	intron	NA	NA	NA	NA	NA	NA
118	chr1	61516000	61516199	126.072	133.417	64.201	65.612	3.85738	H1	intergenic	NA	NA	NA	NA	NA	NA
119	chr9	25677900	25678099	110.063	116.912	61.8664	62.3719	3.33726	H1	exon	ENSG00000198680	TUSC1	3.4096	4.26137	3.22975	3.55664
120	chr14	96001500	96001699	42.0239	45.3892	15.1748	15.3905	3.20084	H1	promoter	ENSG00000182512	GLRX5	35.0575	30.7393	26.8428	30.1902
121	chr4	40058600	40058799	254.144	279.212	131.904	132.034	4.94825	H1	promoter	ENSG00000078177	N4BP2	1.72401	2.89466	2.26316	1.82519
122	chr19	50094000	50094199	108.728	118.746	63.4228	63.452	3.27929	H1	promoter	ENSG00000126464	PRR12	4.78888	4.86551	5.43397	4.86502
123	chr3	11609900	11610099	446.254	471.773	314.001	315.1	4.19114	H1	intron	NA	NA	NA	NA	NA	NA
124	chr6	157342350	157342549	290.165	312.223	176.261	177.396	4.45357	H1	intron	NA	NA	NA	NA	NA	NA
125	chr17	43415450	43415649	134.076	143.503	84.4341	85.5927	3.12908	H1	intergenic	ENSG00000006062	MAP3K14	1.38127	1.01757	1.56523	1.07376
126	chr3	188666100	188666299	69.2394	75.6487	34.3184	35.1551	3.16572	H1	intergenic	ENSG00000188001	TPRG1	0.0141524	0.107518	0.391018	0
127	chr1	16472450	16472649	184.772	197.604	107.78	109.893	3.93141	H1	intron	ENSG00000142627	EPHA2	33.5131	41.134	35.4191	32.1792
128	chr18	46368000	46368199	114.065	122.413	59.5318	60.7519	3.67215	H1	intron	NA	NA	NA	NA	NA	NA
129	chr20	49126900	49127099	154.088	166.427	87.5468	86.6727	3.87049	H1	promoter	ENSG00000196396	PTPN1	29.8481	37.7382	33.133	25.0123
130	chr4	10118750	10118949	286.163	301.219	190.268	190.356	3.89498	H1	intergenic	ENSG00000071127	WDR1	312.887	316.262	309.062	263.617
131	chr6	30484800	30484999	182.103	193.936	110.893	110.973	3.74498	H1	intergenic	ENSG00000235781	XXbac-BPG249D20.9	0	0.187128	0	0.0974848
132	chrX	152992150	152992349	70.0398	72.8978	26.8477	18.6306	4.09353	H1	intron	ENSG00000101986	ABCD1	3.19564	2.6612	2.64151	2.58452
133	chr3	156392500	156392699	114.065	116.912	64.201	54.2717	3.61788	H1	promoter	ENSG00000163659	TIPARP	7.1358	13.327	7.38582	8.06502
134	chr17	61752900	61753099	135.677	138.918	85.6792	75.6564	3.31882	H1	intron	ENSG00000136490	LIMD2	15.463	16.7717	19.1124	15.6706
135	chr1	23073450	23073649	122.069	125.164	59.5318	47.7915	4.22345	H1	intron	ENSG00000133216	EPHB2	24.9469	20.7958	19.0432	11.9832
136	chr1	16122200	16122399	174.099	177.431	106.223	94.773	3.79101	H1	intergenic	ENSG00000224321	RP11-169K16.6	6.52577	6.55352	6.53492	5.65205
137	chr2	47077450	47077649	74.0421	74.7317	33.8514	28.3509	3.57752	H1	intron	ENSG00000222005	AC016722.1	0.103687	0	0	0
138	chr3	23245150	23245349	86.0489	86.6521	40.8552	34.8311	3.67005	H1	promoter	ENSG00000182247	UBE2E2	12.662	14.2851	14.6278	12.9413
139	chr17	73682550	73682749	146.083	147.171	92.216	85.0526	3.26373	H1	intron	ENSG00000161526	SAP30BP	76.1451	74.2409	88.8463	51.2944
140	chr5	34608450	34608649	294.167	298.468	129.569	107.733	5.67551	H1	intergenic	ENSG00000039560	RAI14	400.761	376.799	554.661	367.973
141	chr6	31704900	31705099	102.058	103.157	57.1973	51.0316	3.33438	H1	intergenic	ENSG00000213719	CLIC1	314.829	277.961	287.445	216.297
142	chr2	9347400	9347599	150.085	149.922	96.8852	88.2927	3.19541	H1	promoter	ENSG00000151693	ASAP2	27.5606	27.173	33.764	33.8924
143	chr1	113217600	113217799	146.083	147.171	82.8777	72.0922	3.84757	H1	promoter	ENSG00000155363	MOV10	141.354	125.771	118.735	125.149
144	chr17	73120300	73120499	72.708	72.8978	37.7424	31.591	3.1921	H1	intron	ENSG00000125458	NT5C	9.25577	7.85286	8.75701	5.00554
145	chr6	35996200	35996399	262.149	262.707	131.904	109.353	5.14718	H1	promoter	ENSG00000112062	MAPK14	30.258	23.229	28.7851	25.9917
146	chr13	21649800	21649999	298.169	303.97	166.923	148.235	4.91678	H1	intergenic	ENSG00000150457	LATS2	23.8247	37.6806	32.0778	24.5809
147	chr12	54822100	54822299	149.285	153.223	82.8777	75.0083	3.93124	H1	intergenic	ENSG00000139572	GPR84	0	0.0293593	0	0
148	chr1	59365200	59365399	238.135	243.451	141.242	128.794	4.32265	H1	exon	ENSG00000232453	RP4-794H19.1	2.31034	1.08559	0.317439	0.191886
149	chr1	19536300	19536499	138.078	141.669	78.2085	70.4722	3.75262	H1	intron	ENSG00000127481	UBR4	105.952	99.1435	89.8913	93.7872
150	chr14	100608450	100608649	342.194	353.486	197.272	177.396	5.0187	H1	intron	ENSG00000100811	YY1	53.7332	51.7265	51.8562	60.8718
151	chr1	230778300	230778499	134.076	138.918	73.5393	65.612	3.87066	H1	promoter	ENSG00000135775	COG2	11.1349	13.9344	14.3357	12.6333
152	chr15	89173450	89173649	46.0262	48.1401	17.5094	13.7704	3.40687	H1	exon	ENSG00000172183	ISG20	16.6395	24.8781	55.0101	28.2146
153	chr3	127453050	127453249	142.081	149.922	59.5318	47.7915	4.84814	H1	intron	ENSG00000114626	ABTB1	6.00442	5.1533	5.80226	6.66825
154	chr11	86511100	86511299	150.085	155.424	92.216	83.4326	3.56427	H1	promoter	ENSG00000150687	PRSS23	420.596	417.179	426.81	368.3
155	chr10	43892500	43892699	98.0557	100.406	52.5281	49.4115	3.37459	H1	intron	ENSG00000169813	HNRNPF	162.521	155.653	162.082	151.832
156	chr16	2318200	2318399	118.067	120.579	62.6446	58.5918	3.67923	H1	exon	ENSG00000205937	RNPS1	49.1791	50.1849	49.5353	42.7863
157	chr11	94226500	94226699	142.081	144.42	82.8777	78.5724	3.54501	H1	intron	ENSG00000020922	MRE11A	22.8677	19.4962	19.0253	16.3936
158	chr2	9770800	9770999	50.0284	50.8909	22.1785	20.2506	2.99566	H1	intron	ENSG00000134308	YWHAQ	297.169	281.778	291.205	265.083
159	chr2	202316650	202316849	66.0375	67.3961	26.8477	23.4907	3.65212	H1	promoter	ENSG00000115993	TRAK2	18.7381	21.079	20.3432	20.0882
160	chr1	155532600	155532799	62.0353	64.6452	24.5131	20.2506	3.71632	H1	promoter	ENSG00000116539	ASH1L	6.20394	7.66418	7.15668	7.64328
161	chr19	8407400	8407599	130.074	133.417	80.5431	75.3323	3.21197	H1	intron	ENSG00000186994	KANK3	4.57242	4.50516	6.04277	6.03879
162	chr7	107642850	107643049	326.185	336.98	166.923	149.855	5.36075	H1	intron	ENSG00000091136	LAMB1	247.497	276.982	236.342	265.453
163	chr1	23885600	23885799	94.0535	97.6556	54.0845	50.4916	3.10429	H1	exon	ENSG00000117318	ID3	111.154	137.025	135.724	178.615
164	chr18	46429100	46429299	60.7012	63.7283	26.0695	22.9507	3.45956	H1	intergenic	ENSG00000101665	SMAD7	0.777619	0.420655	0.435883	1.06989
165	chr2	160569400	160569599	66.0375	68.3131	33.0732	30.511	3.08289	H1	promoter	ENSG00000136536	2013-03-07	57.8402	59.9683	50.1093	51.8852
166	chr16	30538350	30538549	234.133	240.7	120.231	110.973	4.81477	H1	intergenic	ENSG00000245600	AC002310.2	1.60552	1.49214	1.17512	0.810164
167	chr4	107237400	107237599	226.129	221.444	146.69	145.535	3.44557	H1	exon	ENSG00000145348	TBCK	13.064	18.2716	12.4998	21.0339
168	chr10	32635300	32635499	72.708	70.147	31.5169	30.511	3.41326	H1	intron	ENSG00000120616	EPC1	14.4837	14.786	12.4057	13.3857
169	chr2	20818200	20818399	210.119	207.69	96.8852	91.5329	4.85655	H1	promoter	ENSG00000118960	HS1BP3	12.9196	10.3675	10.5831	14.5492
170	chr14	69261100	69261299	166.094	163.676	80.5431	76.9524	4.34543	H1	intron	ENSG00000185650	ZFP36L1	74.7702	57.3956	49.7738	52.0268
171	chr11	122527100	122527299	66.0375	64.6452	22.1785	20.2506	3.90874	H1	promoter	ENSG00000154127	UBASH3B	14.577	12.5556	17.4052	8.95854
172	chr16	85168200	85168399	38.0216	37.1366	12.8402	12.1504	3.06785	H1	intergenic	ENSG00000248782	AC026469.1	0	0	0.00212961	0
173	chr18	13659450	13659649	30.0171	28.884	8.17104	7.29023	3.08358	H1	intergenic	ENSG00000177150	C18orf19	4.55944	3.83472	5.17743	4.1564
174	chr14	21572400	21572599	88.7171	85.7352	45.5244	46.7115	3.08313	H1	intron	ENSG00000165795	NDRG2	0.121013	0	0	0.088979
175	chr17	36607800	36607999	162.893	159.275	99.2197	100.605	3.25961	H1	intron	ENSG00000225485	ARHGAP23	27.7932	38.5208	43.2897	32.2535
176	chr20	36781650	36781849	70.0398	67.3961	22.1785	23.4907	3.94129	H1	intron	ENSG00000198959	TGM2	423.948	396.201	355.729	289.933
177	chr4	10097700	10097899	170.097	163.676	59.5318	62.3719	5.04039	H1	intron	ENSG00000071127	WDR1	312.887	316.262	309.062	263.617
178	chr10	12084850	12085049	306.174	301.219	183.265	187.116	4.26134	H1	intron	ENSG00000151461	UPF2	42.2339	33.0498	31.6636	35.796
179	chr1	60746050	60746249	134.076	130.666	75.8739	78.5724	3.27853	H1	intergenic	NA	NA	NA	NA	NA	NA
180	chr20	34329650	34329849	128.74	126.081	75.8739	78.0324	3.05734	H1	intron	ENSG00000131051	RBM39	186.607	192.877	189.385	203.935
181	chr1	20208950	20209149	110.063	108.659	54.8627	55.8917	3.56065	H1	promoter	ENSG00000169914	OTUD3	2.6486	1.7236	3.7026	3.43876
182	chr1	203598550	203598749	126.072	125.164	50.1935	52.6516	4.37451	H1	intron	ENSG00000058668	ATP2B4	36.7953	33.3046	27.2403	29.7898
183	chr20	2851350	2851549	138.078	137.085	64.9792	66.6921	4.07694	H1	intron	ENSG00000132670	PTPRA	34.2994	34.4747	30.2699	33.2632
184	chr2	219537050	219537249	126.072	125.164	64.201	63.992	3.73355	H1	promoter	ENSG00000163482	STK36	16.6066	15.1915	17.8774	20.3886
185	chr3	127309350	127309549	130.074	127.915	68.8702	68.8521	3.60785	H1	exon	ENSG00000073111	MCM2	23.7862	20.9703	17.0869	11.9961
186	chrX	153236700	153236899	138.078	136.168	71.2048	70.4722	3.81675	H1	exon	ENSG00000172534	HCFC1	22.814	28.0808	22.2249	24.9943
187	chr19	17622550	17622749	230.131	226.946	152.915	144.995	3.49181	H1	promoter	ENSG00000130313	PGLS	31.25	28.5427	31.7465	29.7814
188	chr17	1620000	1620199	654.372	650.579	421.392	396.102	5.2297	H1	promoter	ENSG00000167716	WDR81	3.31769	4.42727	3.59109	4.09814
189	chr17	32567550	32567749	84.7148	83.9013	47.0807	42.9313	3.00169	H1	intergenic	ENSG00000108691	CCL2	433.351	822.364	327.942	280.75
190	chr7	44622150	44622349	286.163	284.714	171.592	164.435	4.34421	H1	intergenic	ENSG00000158604	TMED4	82.6434	90.6801	84.8401	86.5241
191	chr2	113570150	113570349	62.0353	61.8944	23.5793	20.8987	3.64653	H1	intergenic	ENSG00000125538	IL1B	0	0.0933934	0.355716	0
192	chr17	42977650	42977849	62.0353	61.8944	24.5131	21.8707	3.5603	H1	promoter	ENSG00000167131	CCDC103	1.85418	2.18621	1.76543	2.85667
193	chr7	26192600	26192799	54.0307	53.6418	24.5131	21.8707	3.02829	H1	promoter	ENSG00000050344	NFE2L3	15.5897	15.5168	13.8872	16.4853
194	chr13	95254050	95254249	54.0307	53.6418	19.8439	17.0105	3.53663	H1	promoter	ENSG00000152749	GPR180	4.7865	4.35041	4.00747	5.33153
195	chr14	95725800	95725999	70.0398	70.147	36.186	33.211	2.99968	H1	intron	ENSG00000165959	CLMN	4.09137	4.17035	1.65726	1.45824
196	chr18	33040000	33040199	114.065	114.161	69.6484	65.072	3.01227	H1	intergenic	ENSG00000153391	INO80C	52.6387	49.142	44.71	37.3273
197	chr10	106086250	106086449	194.11	193.936	127.235	120.694	3.36948	H1	intron	ENSG00000148841	ITPRIP	23.1921	48.7079	22.9548	21.3352
198	chr8	103876000	103876199	158.09	158.175	94.5506	88.2927	3.57785	H1	intron	ENSG00000253263	KB-1507C5.3	0.206869	0	0	0
199	chr4	18022950	18023149	126.072	122.413	54.8627	46.1714	4.38574	H1	intron	ENSG00000178177	LCORL	8.11951	9.30493	7.01425	7.51795
200	chr20	32375800	32375999	126.072	122.413	59.5318	51.0316	4.15534	H1	intron	ENSG00000229188	RP4-553F4.2	0	0	0	0.285012
201	chr18	12308550	12308749	166.094	158.175	68.8702	57.5118	4.8703	H1	promoter	ENSG00000176014	TUBB6	217.056	197.927	245.846	126.364
202	chr4	184365300	184365499	182.103	177.431	108.558	99.6331	3.76207	H1	promoter	ENSG00000168564	CDKN2AIP	7.99035	10.4467	7.86389	6.13853
203	chr11	9634950	9635149	158.09	153.59	93.7724	86.1327	3.5706	H1	intergenic	ENSG00000243964	RP11-16F15.1	1017.8	931.648	1092.45	799.052
204	chr4	144435050	144435249	122.069	119.662	66.5356	62.3719	3.52227	H1	promoter	ENSG00000153147	SMARCA5	54.0148	44.6513	52.668	65.8912
205	chr17	6923000	6923199	206.117	202.188	117.896	110.973	4.0798	H1	intergenic	ENSG00000161940	BCL6B	138.232	300.313	259.622	142.68
206	chr21	43299700	43299899	150.085	144.42	78.2085	72.0922	3.97157	H1	intergenic	NA	NA	NA	NA	NA	NA
207	chr2	182756600	182756799	78.0444	75.6487	38.5206	34.8311	3.25297	H1	promoter	ENSG00000138434	SSFA2	172.239	168.148	220.865	206.911
208	chr3	52528450	52528649	206.117	199.437	89.8814	80.1925	5.01216	H1	promoter	ENSG00000010327	STAB1	133.126	127.461	94.3637	82.2272
209	chr4	125634250	125634449	155.688	152.123	95.9513	91.5329	3.29093	H1	intergenic	ENSG00000151458	ANKRD50	18.6665	22.7769	13.8284	13.4828
210	chr22	38072550	38072749	66.0375	84.8182	40.077	33.7511	3.31726	H1	promoter	ENSG00000100097	LGALS1	6623.65	7427.32	6224.7	4930.96
211	chr1	204462500	204462699	134.076	171.929	82.8777	70.4722	4.26403	H1	intergenic	ENSG00000133056	PIK3C2B	30.9993	24.8013	26.3379	28.8625
212	chr16	2220850	2221049	178.101	218.693	122.566	109.353	4.03076	H1	intron	ENSG00000131653	TRAF7	47.5309	44.3429	43.9766	41.8138
213	chr7	75988450	75988649	278.158	342.482	190.268	172.535	4.6753	H1	intergenic	ENSG00000170027	YWHAG	101.072	97.0212	125.55	109.083
214	chr1	23503600	23503799	162.092	193.936	120.231	110.973	3.33524	H1	intergenic	ENSG00000169641	LUZP1	38.0525	46.0407	42.8721	40.5038
215	chr8	97273550	97273749	146.083	180.181	99.2197	85.0526	3.9015	H1	intron	ENSG00000156469	MTERFD1	13.0342	9.70103	11.1082	11.681
216	chr11	35133050	35133249	178.101	226.946	106.223	88.2927	4.78933	H1	intergenic	ENSG00000026508	CD44	137.918	108.612	108.063	68.63
217	chr19	17833250	17833449	74.0421	97.6556	38.5206	29.9709	4.04725	H1	intron	ENSG00000130479	MAP1S	15.4293	14.5777	15.6464	14.8865
218	chr21	44758200	44758399	50.0284	64.6452	24.5131	18.6306	3.56749	H1	intergenic	NA	NA	NA	NA	NA	NA
219	chr19	41830350	41830549	127.406	156.341	78.2085	66.6921	4.04438	H1	exon	ENSG00000142046	TMEM91	11.7376	10.2667	12.3908	11.0166
220	chr17	47438850	47439049	118.067	147.171	68.8702	57.5118	4.17576	H1	intron	ENSG00000198740	ZNF652	6.04351	5.00641	5.91365	9.40461
221	chr3	179168700	179168899	222.126	262.707	157.584	141.754	4.02141	H1	intron	ENSG00000114450	GNB4	30.448	31.3564	26.7094	29.1323
222	chr9	21335150	21335349	242.138	273.711	190.268	179.016	3.15959	H1	exon	ENSG00000198642	KLHL9	13.2753	12.9776	14.475	17.3264
223	chr5	96270350	96270549	238.135	279.212	171.592	157.955	3.94077	H1	promoter	NA	NA	NA	NA	NA	NA
224	chr22	18121500	18121699	56.6989	71.9809	33.8514	28.8909	3.08236	H1	promoter	ENSG00000099968	BCL2L13	31.893	28.0914	32.3026	30.524
225	chr1	159894500	159894699	210.119	270.96	115.562	98.0131	5.25496	H1	intron	ENSG00000158710	TAGLN2	404.452	394.797	417.468	332.715
226	chr2	232027400	232027599	74.0421	97.6556	38.5206	31.591	3.99054	H1	intron	ENSG00000135914	HTR2B	0.180966	0.239116	0.0637068	0.12229
227	chr5	42992550	42992749	282.16	331.479	197.272	182.256	4.33479	H1	intergenic	ENSG00000250711	CTD-2201E18.1	0.281422	0.52008	0.110692	1.3175
228	chr1	59281250	59281449	105.26	130.666	62.3333	54.5957	3.87867	H1	intron	ENSG00000234807	RP4-794H19.2	0.0527467	0.0202505	0.240665	0.0806868
229	chr6	31587900	31588099	124.738	149.005	84.4341	76.9524	3.41395	H1	promoter	ENSG00000204469	PRRC2A	83.592	90.0193	83.7118	74.7964
230	chr12	13254600	13254799	298.169	347.984	213.614	201.696	4.20022	H1	intron	ENSG00000111305	GSG1	0.0755566	0.16301	0.197232	0
231	chr10	43902800	43902999	106.06	136.168	57.1973	49.4115	4.27972	H1	intron	ENSG00000169813	HNRNPF	162.521	155.653	162.082	151.832
232	chr12	54814850	54815049	262.149	328.728	150.581	132.034	5.31862	H1	intergenic	ENSG00000094916	CBX5	58.8328	55.1433	50.3114	42.7779
233	chr2	62534250	62534449	334.19	380.994	236.96	224.377	4.29188	H1	intergenic	NA	NA	NA	NA	NA	NA
234	chr5	131132400	131132599	174.099	196.687	127.235	120.694	3.1256	H1	intron	ENSG00000158987	RAPGEF6	6.72804	5.138	5.8025	11.7883
235	chr17	41446750	41446949	138.078	158.175	96.8852	89.9128	3.15245	H1	promoter	ENSG00000243582	AC087650.2	1.34941	3.74758	0	0
236	chr3	58037600	58037799	174.099	207.69	101.554	89.9128	4.49392	H1	intron	ENSG00000136068	FLNB	311.583	320.469	308.696	246.407
237	chr7	148580800	148580999	42.0239	53.6418	17.5094	13.7704	3.54444	H1	intron	ENSG00000106462	EZH2	18.584	18.8232	15.9661	12.7683
238	chr22	36731100	36731299	122.069	141.669	82.8777	75.3323	3.24708	H1	intron	ENSG00000100345	MYH9	437.159	523.426	468.625	436.561
239	chr17	64455250	64455449	162.092	188.434	108.558	98.0131	3.74016	H1	intron	NA	NA	NA	NA	NA	NA
240	chr2	122288250	122288449	232.799	270.96	156.028	140.674	4.26771	H1	intron	NA	NA	NA	NA	NA	NA
241	chr6	43026900	43027099	130.074	149.922	89.8814	81.8125	3.2224	H1	promoter	ENSG00000044090	CUL7	8.6241	11.0623	9.94788	9.48091
242	chr2	232571400	232571599	330.188	386.496	222.953	200.076	4.77513	H1	intergenic	ENSG00000187514	PTMA	1522.31	1321.65	1785.54	1264.97
243	chrX	64888200	64888399	274.156	328.728	173.926	151.475	4.91405	H1	promoter	ENSG00000147065	MSN	423.935	437.143	447.234	481.72
244	chr10	124069250	124069449	102.058	122.413	64.201	55.8917	3.52043	H1	intron	ENSG00000138152	BTBD16	0.160985	0.390822	0.177021	0.158874
245	chr19	13166100	13166299	126.072	152.673	78.2085	68.8521	3.88945	H1	intron	ENSG00000104903	LYL1	27.065	22.2908	18.637	14.859
246	chr9	14315600	14315799	142.081	177.431	75.8739	63.992	4.6688	H1	intron	ENSG00000147862	NFIB	81.8551	88.4204	61.2824	75.9083
247	chr22	24236750	24236949	62.0353	81.1504	26.8477	20.2506	4.13802	H1	promoter	ENSG00000218537	AP000350.4	0.739229	1.30709	1.45908	0.653045
248	chr1	16502300	16502499	94.0535	111.41	57.1973	48.3315	3.5259	H1	intergenic	ENSG00000224621	RP11-276H7.3	0.2002	0.102419	0	0
249	chr9	116360550	116360749	66.0375	80.0501	39.4544	31.915	3.22249	H1	intergenic	ENSG00000237073	RP11-168K11.2	0.996566	1.17414	0.589507	1.45157
250	chr11	109964500	109964699	198.113	237.949	122.566	101.253	4.63328	H1	promoter	ENSG00000149289	ZC3H12C	2.90271	8.5435	7.03597	4.90665
251	chr1	156867000	156867199	354.201	408.503	243.964	214.657	4.77163	H1	intron	ENSG00000187800	PEAR1	46.7005	41.4276	41.0376	35.5792
252	chr4	77996800	77996999	106.06	125.164	68.8702	59.1318	3.42495	H1	exon	ENSG00000118816	CCNI	499.208	510.493	442.006	491.866
253	chr18	22931350	22931549	294.167	353.486	204.276	177.396	4.68129	H1	intron	ENSG00000198795	ZNF521	28.6669	31.4809	21.9517	23.7722
254	chr1	10459250	10459449	122.069	155.424	73.5393	57.5118	4.30246	H1	promoter	ENSG00000142657	PGD	288.569	290.551	308.783	262.075
255	chr1	46598200	46598399	90.0512	108.659	61.8664	52.6516	3.08082	H1	exon	ENSG00000117461	PIK3R3	8.34365	5.12993	6.38581	5.03907
256	chr11	64623700	64623899	29.2166	39.3373	12.8402	7.93825	3.24193	H1	intron	ENSG00000171219	CDC42BPG	0.360556	0.338816	0.0711273	0.618728
257	chr6	44214250	44214449	142.081	177.431	85.2122	68.8521	4.41971	H1	promoter	ENSG00000096384	HSP90AB1	1191.95	1051.29	999.231	982.168
258	chr6	26158600	26158799	50.0284	64.6452	26.8477	20.2506	3.38805	H1	promoter	ENSG00000197697	HIST1H2BE	0.114419	0.116751	0.202398	0
259	chr17	73975850	73976049	127.406	149.005	89.1032	79.1125	3.26682	H1	promoter	ENSG00000161533	ACOX1	10.9574	10.9289	12.6143	13.3805
260	chr5	172287500	172287699	362.206	427.759	253.302	219.517	4.8788	H1	intron	ENSG00000113719	ERGIC1	157.466	156.364	165.849	152.004
261	chr14	55369250	55369449	42.0239	56.3927	17.5094	10.5303	3.84808	H1	exon	ENSG00000131979	GCH1	2.07973	2.2931	5.46086	2.89822
262	chr1	23429550	23429749	103.392	118.746	64.201	61.2919	3.23639	H1	intron	ENSG00000169641	LUZP1	38.0525	46.0407	42.8721	40.5038
263	chr9	33025250	33025449	178.101	204.939	108.558	104.493	4.086	H1	promoter	ENSG00000086061	DNAJA1	242.133	198.047	217.639	216.229
264	chr19	41907200	41907399	190.108	218.693	115.562	110.973	4.19449	H1	intron	ENSG00000142046	TMEM91	11.7376	10.2667	12.3908	11.0166
265	chr17	43662000	43662199	90.0512	103.157	54.8627	54.2717	3.03078	H1	intergenic	ENSG00000204652	RPS26P8	79.7663	64.8858	83.8123	66.4171
266	chrX	9982600	9982799	122.069	138.918	75.8739	73.7123	3.39837	H1	intergenic	ENSG00000047644	WWC3	18.2377	22.0613	18.1558	18.8743
267	chr9	137285050	137285249	134.076	155.424	73.5393	70.4722	4.08668	H1	intron	ENSG00000186350	RXRA	9.32432	9.39429	7.24168	7.53367
268	chr9	21995850	21996049	106.06	122.413	59.5318	57.5118	3.64416	H1	intron	NA	NA	NA	NA	NA	NA
269	chr19	47583150	47583349	46.0262	56.3927	19.8439	17.0105	3.43845	H1	intron	ENSG00000130748	TMEM160	36.1545	38.5061	36.3516	37.8623
270	chr17	40670850	40671049	147.684	170.278	91.7491	86.3487	3.79392	H1	intron	ENSG00000108784	NAGLU	16.3098	18.1047	11.472	9.74859
271	chr21	45674600	45674799	106.06	122.413	66.5356	62.3719	3.28947	H1	intron	ENSG00000141956	PRDM15	2.51096	1.9695	4.34848	2.75694
272	chr1	55777000	55777199	110.063	130.666	61.0882	59.1318	3.82805	H1	intergenic	ENSG00000231900	GOT2P1	0.296305	0.512482	0.463767	0.467486
273	chr9	114246450	114246649	78.0444	92.1538	45.5244	44.5514	3.12663	H1	exon	ENSG00000136813	KIAA0368	31.5451	30.136	31.6978	35.077
274	chr20	36155800	36155999	142.081	169.178	80.5431	76.9524	4.1599	H1	intron	ENSG00000166619	BLCAP	48.2481	40.507	42.0291	44.6116
275	chr1	159893900	159894099	390.222	452.517	243.964	234.097	5.15262	H1	intron	ENSG00000158710	TAGLN2	404.452	394.797	417.468	332.715
276	chr15	75660550	75660749	174.099	204.939	101.554	96.393	4.32735	H1	intron	ENSG00000140400	MAN2C1	12.4777	12.7486	12.8275	12.8202
277	chr11	64036700	64036899	94.0535	105.908	57.1973	55.8917	3.05983	H1	exon	ENSG00000173264	GPR137	18.9263	18.3831	23.3833	15.6662
278	chr3	50197900	50198099	158.09	188.434	66.5356	63.992	5.083	H1	intron	ENSG00000235016	RP11-493K19.3	3.24581	4.26321	3.65493	1.53857
279	chr11	65327700	65327899	76.7103	89.403	37.7424	36.9912	3.58548	H1	intergenic	ENSG00000168056	LTBP3	43.8831	37.1062	38.1032	39.4933
280	chr17	18217950	18218149	86.0489	100.406	40.8552	41.3113	3.80822	H1	promoter	ENSG00000177302	TOP3A	11.5163	9.5278	11.6748	9.30543
281	chr2	43454350	43454549	150.085	171.929	78.2085	78.5724	4.29807	H1	promoter	ENSG00000234936	AC010883.5	0	0.347502	1.32292	0.585556
282	chr20	43976800	43976999	90.0512	103.157	47.8589	47.7915	3.50835	H1	intron	ENSG00000124145	SDC4	21.1378	30.4494	25.8588	29.2847
283	chr8	144679200	144679399	54.0307	61.8944	26.8477	26.7308	2.97954	H1	intron	ENSG00000104529	EEF1D	315.745	293.633	333.514	251.761
284	chr17	47755000	47755199	218.124	240.7	145.911	144.995	3.69936	H1	intron	ENSG00000121067	SPOP	65.3697	48.0751	49.5099	56.3173
285	chr22	24437200	24437399	14.008	17.8806	1.16729	0.810025	3.18648	H1	intron	ENSG00000099991	CABIN1	18.3052	21.0357	13.9682	14.4606
286	chr2	197791000	197791199	150.085	169.178	96.8852	93.1529	3.5141	H1	intron	ENSG00000197121	PGAP1	3.44355	3.62236	2.94223	3.13966
287	chr13	114884300	114884499	534.304	587.309	384.039	371.802	4.63253	H1	intron	ENSG00000185989	RASA3	17.4007	16.3815	19.6133	15.1656
288	chrX	152759900	152760099	114.065	133.417	57.1973	52.6516	4.20225	H1	promoter	ENSG00000183479	TREX2	0	0.11524	0.0988247	0
289	chr17	25887550	25887749	314.179	339.731	234.626	229.237	3.48253	H1	intron	ENSG00000168961	LGALS9	22.4607	26.2211	22.5554	12.4343
290	chr20	2633500	2633699	106.06	125.164	45.5244	41.3113	4.50153	H1	promoter	ENSG00000101361	NOP56	157.327	150.457	152.409	118.198
291	chr8	61822650	61822849	102.058	114.161	61.8664	59.1318	3.21208	H1	intergenic	ENSG00000254777	AC022182.1	0	0.0937013	0	0
292	chr8	10573000	10573199	266.151	306.721	134.238	127.174	5.32602	H1	intergenic	ENSG00000183638	RP1L1	0.216671	0.225814	0.237015	0.300122
293	chr3	128903000	128903199	294.167	331.479	199.607	179.016	4.42354	H1	intergenic	ENSG00000169714	CNBP	162.885	166.186	168.774	132.264
294	chr3	51977050	51977249	106.06	122.413	64.201	54.2717	3.62395	H1	promoter	ENSG00000041880	PARP3	6.59423	9.70494	7.98189	5.58422
295	chr1	65886300	65886499	130.074	144.42	89.8814	81.8125	3.05306	H1	promoter	ENSG00000116678	LEPR	5.85647	7.28538	7.35574	10.0795
296	chr17	61523950	61524149	194.11	218.693	127.235	115.834	3.94379	H1	intergenic	ENSG00000008283	CYB561	24.6427	26.998	29.3906	37.8061
297	chr16	73053850	73054049	66.0375	76.5656	36.9642	31.591	3.18534	H1	intron	ENSG00000140836	ZFHX3	4.33057	5.03216	3.91106	4.74147
298	chr20	60961750	60961949	174.099	199.437	96.8852	85.0526	4.52154	H1	promoter	ENSG00000171858	RPS21	2495.17	2792.33	2336.89	2117.93
299	chr16	25269300	25269499	154.088	174.68	94.5506	86.6727	3.89375	H1	intergenic	ENSG00000155592	ZKSCAN2	1.56741	2.16082	1.60395	1.73536
300	chr21	38444900	38445099	122.069	138.918	75.8739	68.8521	3.54261	H1	promoter	ENSG00000141959	PFKL	43.3043	44.9572	51.3182	43.3488
301	chr19	8510250	8510449	106.06	122.413	59.5318	52.6516	3.79167	H1	promoter	ENSG00000099783	HNRNPM	138.185	134.011	122.523	104.148
302	chr19	4574750	4574949	198.113	221.444	131.904	122.314	3.82313	H1	intergenic	ENSG00000167680	SEMA6B	35.6923	35.6139	33.8448	37.2299
303	chr2	162016800	162016999	114.065	130.666	71.2048	63.992	3.47264	H1	intron	ENSG00000136560	TANK	96.7239	102.532	82.8444	83.6087
304	chr1	94146600	94146799	214.122	248.953	129.569	114.214	4.5876	H1	intron	NA	NA	NA	NA	NA	NA
305	chr13	25086700	25086899	226.129	268.209	127.235	110.973	4.98657	H1	intron	ENSG00000102699	PARP4	39.1112	35.0919	27.3094	36.884
306	chr2	161264050	161264249	38.0216	48.1401	12.8402	8.91028	3.75951	H1	intron	ENSG00000153250	RBMS1	26.2992	28.886	30.419	36.7742
307	chr12	95467050	95467249	90.0512	103.157	57.1973	52.6516	3.01191	H1	intron	ENSG00000120798	NR2C1	20.0376	11.7106	18.5385	22.719
308	chr8	48651250	48651449	62.0353	70.147	31.5169	29.9709	3.14347	H1	intergenic	ENSG00000221869	CEBPD	1.01839	2.23154	1.17795	1.03184
309	chr7	5631850	5632049	54.0307	61.8944	22.1785	20.2506	3.54181	H1	promoter	ENSG00000075618	FSCN1	148.409	138.693	143.848	150.051
310	chr6	139350200	139350399	118.067	127.915	75.8739	73.7123	3.00028	H1	promoter	ENSG00000146386	C6orf115	237.981	257.833	234.822	269.182
311	chr3	141595600	141595799	70.0398	78.3995	29.1823	26.7308	3.82906	H1	promoter	ENSG00000069849	ATP1B3	204.729	203.583	278.227	408.963
312	chr10	74033050	74033249	210.119	229.697	117.896	112.594	4.47242	H1	promoter	ENSG00000168209	DDIT4	64.6338	41.9192	53.4383	45.7059
313	chr17	38171200	38171399	87.383	97.6556	41.6334	40.2313	3.76158	H1	promoter	ENSG00000108342	CSF3	1.03726	1.22317	0.222077	0.212365
314	chr6	85473500	85473699	110.063	122.413	50.1935	47.7915	4.21447	H1	intron	ENSG00000112837	TBX18	7.75457	6.77732	7.34593	5.01182
315	chr10	97803600	97803799	162.092	182.932	80.5431	72.0922	4.67068	H1	intron	ENSG00000226688	RP11-429G19.2	4.52346	5.5566	5.61604	3.89856
316	chr12	125004600	125004799	162.092	174.68	113.227	107.733	3.04289	H1	intron	ENSG00000196498	NCOR2	56.5258	60.4064	65.1262	39.9603
317	chr2	3622350	3622549	58.033	64.6452	29.1823	26.7308	3.0884	H1	promoter	ENSG00000247886	AC108488.1	0.920063	1.24082	0.573332	0.908094
318	chr13	103249000	103249199	294.167	314.974	204.276	195.216	3.89393	H1	promoter	ENSG00000134900	TPP2	27.7841	28.1831	27.5924	36.9788
319	chr6	692800	692999	82.0466	92.1538	45.5244	41.3113	3.32952	H1	intron	ENSG00000112685	EXOC2	52.0462	71.2014	53.7395	45.5583
320	chr6	16761200	16761399	48.6943	55.4757	24.5131	21.3307	2.96506	H1	intron	ENSG00000124788	ATXN1	12.3368	15.2456	14.2219	10.6996
321	chr8	131540500	131540699	146.083	163.676	85.2122	76.9524	3.99281	H1	intergenic	ENSG00000153317	ASAP1	56.6304	64.8224	61.6316	58.1017
322	chr7	23571350	23571549	430.245	469.022	304.663	290.799	4.41543	H1	intron	ENSG00000164548	TRA2A	155.113	158.715	128.966	163.479
323	chr7	87848900	87849099	66.0375	75.6487	33.8514	29.9709	3.34799	H1	intron	ENSG00000075142	SRI	166.52	139.334	149.98	134.437
324	chr16	88349200	88349399	290.165	323.226	173.926	162.815	4.79203	H1	intergenic	NA	NA	NA	NA	NA	NA
325	chr20	19866550	19866749	118.067	130.666	75.8739	72.0922	3.14124	H1	promoter	ENSG00000132669	RIN2	28.0598	38.9134	40.4833	36.0189
326	chr1	154493650	154493849	54.0307	67.3961	26.8477	26.7308	3.24011	H1	intron	ENSG00000163239	TDRD10	3.67904	3.18742	2.6401	2.60854
327	chr1	210406750	210406949	50.0284	62.8113	23.7349	23.4907	3.26998	H1	intron	ENSG00000082497	SERTAD4	5.83563	5.14606	2.85658	6.62478
328	chr21	46786600	46786799	100.724	122.413	56.4191	55.8917	3.71595	H1	intergenic	ENSG00000228930	MTCO1P3	14.0308	17.802	30.5305	13.6004
329	chr6	151187200	151187399	118.067	147.171	54.8627	54.2717	4.53643	H1	promoter	ENSG00000120254	MTHFD1L	62.1776	51.9233	68.0952	43.4281
330	chr17	49244350	49244549	126.072	152.673	68.8702	68.8521	4.09171	H1	promoter	ENSG00000011052	NME2	375.31	340.002	342.318	307.902
331	chr11	19701350	19701549	127.406	148.088	87.5468	88.2927	2.99407	H1	intron	NA	NA	NA	NA	NA	NA
332	chr1	6552400	6552599	118.067	138.918	78.2085	78.5724	3.13583	H1	intron	ENSG00000171680	PLEKHG5	18.9138	20.8133	19.2885	15.3101
333	chrX	56591050	56591249	54.0307	67.3961	26.8477	28.3509	3.16358	H1	exon	ENSG00000188021	UBQLN2	14.1183	13.1516	18.5797	16.481
334	chrX	153958650	153958849	178.101	213.192	106.223	109.353	4.19556	H1	intron	ENSG00000160219	GAB3	5.8015	2.60578	2.0329	2.21282
335	chr1	21607000	21607199	91.1947	106.301	52.1946	53.5774	3.28588	H1	intron	ENSG00000231105	RP5-1071N3.1	0.113881	0.21993	0.0286209	0
336	chr9	136710200	136710399	210.119	248.953	110.893	115.834	4.79333	H1	intron	NA	NA	NA	NA	NA	NA
337	chr9	139980850	139981049	86.0489	105.908	31.5169	34.8311	4.41999	H1	promoter	ENSG00000177239	MAN1B1	25.3036	25.3123	25.3037	22.3895
338	chr6	35695600	35695799	186.106	218.693	103.889	109.353	4.39013	H1	intron	ENSG00000096060	FKBP5	38.5916	36.6275	40.2168	33.4489
339	chr17	62409150	62409349	330.188	369.991	225.287	232.477	4.15852	H1	intergenic	ENSG00000136478	TEX2	8.51535	7.60495	9.88336	9.21833
340	chr18	812100	812299	90.0512	105.908	52.5281	54.2717	3.21918	H1	exon	ENSG00000176105	YES1	24.8637	25.8628	22.9807	28.0015
341	chr1	91487350	91487549	318.181	372.742	190.268	195.216	4.94246	H1	intron	ENSG00000122482	ZNF644	20.5758	15.865	27.8558	22.7209
342	chr3	129158500	129158699	218.124	251.704	141.242	146.615	3.96212	H1	promoter	ENSG00000129071	MBD4	18.5665	20.5506	24.7789	19.3479
343	chr17	79884600	79884799	106.06	125.164	61.8664	65.612	3.4204	H1	promoter	ENSG00000197063	MAFG	9.9605	10.7782	11.2224	11.3826
344	chr16	83372050	83372249	198.113	229.697	110.893	112.594	4.48483	H1	intron	NA	NA	NA	NA	NA	NA
345	chr18	72265150	72265349	126.072	141.669	82.8777	83.4326	3.04877	H1	intergenic	ENSG00000206029	AC116904.1	1.48691	0.976211	1.44832	1.32297
346	chr1	8197250	8197449	22.0125	28.884	3.50187	4.05013	3.49269	H1	intergenic	ENSG00000232848	CTA-215D11.4	1.10049	0.707249	1.24731	1.02102
347	chr1	90309400	90309599	110.063	130.666	52.5281	54.2717	4.17188	H1	intron	ENSG00000226394	RP11-413E1.2	1.08073	0	0.168464	0.518818
348	chr4	129732900	129733099	82.0466	100.406	38.5206	38.0712	3.93437	H1	intron	ENSG00000077684	PHF17	14.504	14.9348	19.0241	13.6057
349	chr5	154135200	154135399	82.0466	100.406	38.5206	38.0712	3.93437	H1	intron	ENSG00000155506	LARP1	75.2517	73.858	86.4317	73.6265
350	chr7	92462550	92462749	138.078	171.929	54.8627	55.8917	5.05613	H1	exon	ENSG00000105810	CDK6	3.94696	6.40523	8.89275	4.80115
351	chr19	45244950	45245149	66.0375	78.3995	36.186	36.4511	3.06794	H1	intergenic	ENSG00000069399	BCL3	11.0501	13.9274	9.9431	10.4075
352	chr5	138941300	138941499	74.0421	94.9047	33.8514	31.591	4.04335	H1	promoter	ENSG00000131508	UBE2D2	220.731	211.381	191.869	221.388
353	chr16	88366750	88366949	198.113	237.949	120.231	114.214	4.44773	H1	intergenic	NA	NA	NA	NA	NA	NA
354	chr6	90062350	90062549	82.0466	103.157	40.8552	38.0712	3.94473	H1	exon	ENSG00000198833	UBE2J1	112.066	129.103	217.451	206.768
355	chr19	47217850	47218049	274.156	320.475	183.265	177.396	4.36617	H1	intron	ENSG00000105287	PRKD2	20.0408	19.0894	21.4904	18.823
356	chr11	86666650	86666849	230.131	270.96	145.911	141.754	4.3697	H1	promoter	ENSG00000246523	RP11-736K20.6	0.374873	1.22883	0.313784	0.502796
357	chr17	74381000	74381199	39.3557	49.974	17.5094	15.9305	3.18696	H1	promoter	ENSG00000161542	PRPSAP1	39.5667	34.6665	35.9262	36.5766
358	chr6	151187150	151187349	122.069	155.424	59.5318	51.0316	4.69885	H1	promoter	ENSG00000120254	MTHFD1L	62.1776	51.9233	68.0952	43.4281
359	chr6	85473950	85474149	102.058	125.164	54.8627	49.4115	4.02976	H1	intergenic	ENSG00000112837	TBX18	7.75457	6.77732	7.34593	5.01182
360	chr1	109642950	109643149	170.097	199.437	110.893	104.493	3.86484	H1	promoter	ENSG00000238881	SCARNA2	2.092	2.57489	1.32425	3.13889
361	chr13	104600250	104600449	42.0239	53.6418	17.5094	15.3905	3.45119	H1	intergenic	NA	NA	NA	NA	NA	NA
362	chr17	6917600	6917799	86.0489	107.742	41.6334	37.5312	4.10736	H1	exon	ENSG00000161939	C17orf49	0.308157	0.572246	0.113898	0.317745
363	chr19	984450	984649	106.06	127.915	61.8664	57.5118	3.7361	H1	promoter	ENSG00000065268	WDR18	16.9623	15.7395	15.9337	12.6014
364	chr9	132259300	132259499	142.081	180.181	78.2085	78.5724	4.39747	H1	intron	ENSG00000204054	RP11-492E3.1	22.2875	32.4532	27.178	23.0109
365	chr20	62687150	62687349	174.099	204.939	122.566	122.314	3.41037	H1	intergenic	ENSG00000171703	TCEA2	51.6821	54.605	54.2236	53.48
366	chr2	11484350	11484549	62.0353	83.9013	24.5131	25.1108	4.12452	H1	exon	ENSG00000134318	ROCK2	25.8692	24.5546	31.6571	36.6408
367	chr18	9708350	9708549	70.0398	89.403	36.186	36.4511	3.57288	H1	promoter	ENSG00000168461	RAB31	18.0972	21.5143	26.0843	22.7693
368	chr7	7606750	7606949	58.033	75.6487	29.1823	28.3509	3.48448	H1	promoter	ENSG00000164654	MIOS	5.95503	5.14281	4.47846	5.44268
369	chr20	30154900	30155099	38.0216	53.6418	12.8402	12.1504	3.81755	H1	intron	ENSG00000230613	HM13-AS1	0	0	0	2.09008
370	chr9	95892350	95892549	86.0489	105.908	54.8627	54.2717	3.08205	H1	intron	ENSG00000131669	NINJ1	26.4722	24.8765	22.791	19.8766
371	chr21	44394900	44395099	34.0193	48.1401	12.8402	12.1504	3.51233	H1	promoter	NA	NA	NA	NA	NA	NA
372	chr1	70820100	70820299	222.126	265.458	148.246	144.995	4.1486	H1	exon	ENSG00000118454	ANKRD13C	5.01062	5.20294	3.88815	4.00549
373	chr15	68836250	68836449	178.101	221.444	101.554	98.0131	4.60613	H1	intergenic	ENSG00000103647	CORO2B	4.95402	4.41758	4.73624	4.91029
374	chr6	157098350	157098549	122.069	155.424	59.5318	57.5118	4.56299	H1	promoter	ENSG00000049618	ARID1B	15.0221	13.4732	12.8666	12.4667
375	chr1	21589650	21589849	138.078	171.929	75.8739	73.7123	4.34581	H1	intron	ENSG00000231105	RP5-1071N3.1	0.113881	0.21993	0.0286209	0
376	chr19	52692350	52692549	126.072	152.673	78.2085	76.9524	3.68061	H1	promoter	ENSG00000105568	PPP2R1A	222.043	240.889	241.455	215.836
377	chr11	119189100	119189299	122.069	149.005	73.5393	72.0922	3.78153	H1	intergenic	ENSG00000076706	MCAM	730.422	768.687	1006.32	1045.79
378	chr17	73085000	73085199	108.728	132.5	65.7574	64.532	3.59206	H1	promoter	ENSG00000170190	SLC16A5	4.71275	5.71195	4.08006	4.81944
379	chr10	127407550	127407749	66.0375	83.9013	33.8514	33.211	3.5276	H1	intron	ENSG00000107938	C10orf137	14.1866	8.47922	8.90261	10.2688
380	chr16	87425300	87425499	138.078	160.925	96.8852	96.393	3.04893	H1	intron	ENSG00000140941	MAP1LC3B	49.1325	66.157	62.7116	75.0382
381	chr1	23158200	23158399	174.099	229.697	82.8777	75.3323	5.30402	H1	intron	NA	NA	NA	NA	NA	NA
382	chr3	119041700	119041899	86.0489	111.41	45.5244	41.3113	3.99079	H1	intron	ENSG00000031081	ARHGAP31	25.1073	21.0627	27.6789	26.8125
383	chr1	155024450	155024649	90.0512	111.41	52.5281	49.4115	3.57355	H1	promoter	ENSG00000232093	RP11-307C12.11	3.57233	2.31732	1.62621	2.65449
384	chr12	46873850	46874049	18.0102	26.1332	3.50187	2.43008	3.40779	H1	intergenic	NA	NA	NA	NA	NA	NA
385	chr2	121010800	121010999	146.083	177.431	92.216	88.2927	3.8919	H1	promoter	ENSG00000144118	RALB	112.713	103.826	95.8771	124.884
386	chr3	137906250	137906449	382.217	449.766	267.31	260.018	4.64525	H1	promoter	ENSG00000114098	ARMC8	38.7788	27.7169	26.791	27.5769
387	chr9	127049550	127049749	78.0444	89.403	43.1898	34.8311	3.51094	H1	intron	ENSG00000119408	NEK6	23.9966	25.723	24.9475	20.4647
388	chrX	77041400	77041599	186.106	204.939	129.569	115.834	3.54579	H1	intron	ENSG00000085224	ATRX	23.9546	25.3961	26.7122	22.3207
389	chr5	16936000	16936199	83.3807	93.9878	51.7499	42.9313	3.14464	H1	exon	ENSG00000145555	MYO10	54.2387	61.1007	56.0821	76.4994
390	chr20	17876350	17876549	158.09	174.68	113.227	101.253	3.17517	H1	intergenic	ENSG00000233625	RP5-905G11.3	0	0.0832762	0	0
391	chr1	171454750	171454949	294.167	325.977	204.276	180.636	4.27753	H1	promoter	ENSG00000117523	PRRC2C	185.505	177.266	166.767	155.194
392	chr19	49122200	49122399	298.169	334.23	192.603	166.055	4.73076	H1	intron	ENSG00000063176	SPHK2	3.10136	3.36753	2.89669	2.97958
393	chr19	17830650	17830849	62.0353	73.8148	33.0732	25.1108	3.46689	H1	promoter	ENSG00000130479	MAP1S	15.4293	14.5777	15.6464	14.8865
394	chr10	124739900	124740099	64.7034	76.5656	38.5206	31.051	3.12902	H1	promoter	ENSG00000095574	IKZF5	6.74279	8.47981	11.3386	9.60825
395	chr15	91197550	91197749	46.0262	56.3927	22.1785	15.3905	3.42562	H1	intergenic	ENSG00000197299	BLM	9.91699	4.59685	7.08331	5.04079
396	chr1	153756000	153756199	162.092	180.181	120.231	106.113	3.08676	H1	intergenic	ENSG00000143554	SLC27A3	10.6974	7.92862	10.7403	10.5261
397	chr18	3771550	3771749	78.0444	92.1538	45.5244	34.8311	3.53262	H1	intron	NA	NA	NA	NA	NA	NA
398	chr11	843050	843249	54.0307	64.6452	26.8477	18.6306	3.53749	H1	promoter	ENSG00000214063	TSPAN4	40.3682	37.7301	42.008	40.3033
399	chr19	3404100	3404299	82.0466	94.9047	47.8589	38.0712	3.48122	H1	intron	ENSG00000141905	NFIC	30.2737	28.433	32.4393	24.1041
400	chr6	116600850	116601049	226.129	254.455	150.581	125.554	4.29801	H1	promoter	ENSG00000111817	DSE	14.4825	14.0592	18.9092	13.826
401	chr2	139259650	139259849	42.0239	50.8909	19.8439	12.1504	3.41137	H1	promoter	ENSG00000144228	SPOPL	4.0336	4.26584	6.89032	6.27728
402	chr17	1014350	1014549	326.185	364.489	222.953	177.396	4.80308	H1	intron	ENSG00000159842	ABR	17.9943	17.8368	16.1139	17.906
403	chr11	615900	616099	70.0398	81.1504	38.5206	25.1108	3.68225	H1	exon	ENSG00000185507	IRF7	4.27239	6.14794	6.30985	6.33241
404	chr2	198300000	198300199	394.224	430.51	288.321	247.058	4.45939	H1	intergenic	ENSG00000115524	SF3B1	488.861	389.914	432.621	361.769
405	chr18	33039950	33040149	118.067	131.583	73.5393	58.0518	3.69213	H1	intergenic	ENSG00000153391	INO80C	52.6387	49.142	44.71	37.3273
406	chr4	7651000	7651199	50.0284	59.1435	22.1785	12.1504	3.79334	H1	intron	NA	NA	NA	NA	NA	NA
407	chr20	48391100	48391299	110.063	125.164	64.201	47.7915	3.95738	H1	intergenic	ENSG00000197818	SLC9A8	8.19036	10.1581	9.0105	6.53271
408	chr10	126772400	126772599	186.106	204.939	129.569	110.973	3.66606	H1	intron	ENSG00000175029	CTBP2	73.7273	70.9682	81.0435	66.0639
409	chr21	44582050	44582249	130.074	147.171	73.5393	55.8917	4.24018	H1	intergenic	NA	NA	NA	NA	NA	NA
410	chr6	148763250	148763449	174.099	188.434	127.235	112.594	3.13694	H1	intron	NA	NA	NA	NA	NA	NA
411	chr1	214724600	214724799	246.14	270.96	166.923	143.374	4.18371	H1	exon	ENSG00000152104	PTPN14	22.1987	24.0014	29.9403	18.2068
412	chr22	46731350	46731549	98.0557	108.659	64.201	54.2717	3.07285	H1	promoter	ENSG00000100416	TRMU	43.489	38.6393	37.3214	25.0492
413	chr2	20780100	20780299	154.088	169.178	92.216	73.7123	4.14117	H1	intergenic	ENSG00000118960	HS1BP3	12.9196	10.3675	10.5831	14.5492
414	chr9	71788850	71789049	42.0239	48.1401	15.1748	7.29023	3.82309	H1	promoter	ENSG00000119139	TJP2	40.8772	40.2171	43.3943	39.6548
415	chr6	28104750	28104949	242.138	262.707	169.257	149.855	3.86816	H1	intergenic	ENSG00000198315	ZNF192	5.72594	6.15762	7.02382	6.49178
416	chr1	228270750	228270949	154.088	169.178	99.2197	83.4326	3.77143	H1	promoter	ENSG00000143761	ARF1	382.045	384.559	384.278	353.241
417	chr4	2796250	2796449	190.108	210.441	110.893	88.2927	4.55849	H1	intron	ENSG00000087266	SH3BP2	23.9622	21.8232	22.7657	18.6416
418	chr19	45244500	45244699	82.0466	92.1538	43.1898	31.591	3.79355	H1	intergenic	ENSG00000069399	BCL3	11.0501	13.9274	9.9431	10.4075
419	chr20	60938900	60939099	74.0421	92.1538	45.5244	29.9709	3.69131	H1	intron	ENSG00000130702	LAMA5	38.1137	29.1478	29.6809	23.9597
420	chr6	56708650	56708849	54.0307	67.3961	33.8514	23.4907	3.12501	H1	intergenic	NA	NA	NA	NA	NA	NA
421	chr2	201753350	201753549	102.058	122.413	73.5393	57.5118	3.23898	H1	intron	ENSG00000201499	U6	7.82853	0	44.6822	0
422	chr16	16214150	16214349	76.4434	92.1538	53.4619	40.9873	2.99764	H1	intron	ENSG00000241067	RP11-517A5.1	0.385222	0	0.340475	0.169786
423	chr17	36904150	36904349	206.117	248.953	143.577	109.353	4.4639	H1	exon	ENSG00000056661	PCGF2	18.0829	18.442	17.3466	21.9465
424	chr1	200638900	200639099	166.094	202.188	113.227	89.9128	4.17496	H1	exon	ENSG00000118197	DDX59	5.28326	7.96294	5.76939	7.50659
425	chr20	30424950	30425149	86.0489	103.157	59.5318	47.7915	3.0883	H1	intergenic	ENSG00000179772	FOXS1	0.0653873	0.0338888	0	0
426	chr17	38178100	38178299	63.3693	80.2335	37.7424	25.6508	3.55423	H1	intron	ENSG00000108342	CSF3	1.03726	1.22317	0.222077	0.212365
427	chr19	342150	342349	78.0444	103.157	40.8552	23.4907	4.39699	H1	intron	ENSG00000105556	MIER2	7.9114	7.03895	8.61474	7.01081
428	chr2	28974450	28974649	46.0262	59.1435	22.1785	12.1504	3.73275	H1	promoter	ENSG00000163806	SPDYA	0.151615	0.517194	0.584066	0.174979
429	chr17	1627600	1627799	114.065	141.669	66.5356	46.1714	4.36714	H1	promoter	ENSG00000167716	WDR81	3.31769	4.42727	3.59109	4.09814
430	chr6	33661750	33661949	34.8198	44.2889	18.9101	11.8264	2.99082	H1	intron	ENSG00000246981	AL139044.1	0.771915	0.98622	0.844404	0.519232
431	chr1	21660850	21661049	194.11	229.697	131.904	110.973	4.17567	H1	intron	ENSG00000117298	ECE1	289.012	300.854	312.91	373.891
432	chr3	38066100	38066299	59.3671	72.8978	36.9642	28.3509	3.07554	H1	exon	ENSG00000187091	PLCD1	8.10916	5.51293	7.05226	5.83113
433	chr1	28835850	28836049	90.0512	105.908	61.8664	44.5514	3.32968	H1	exon	ENSG00000180198	RCC1	39.3757	34.1328	33.7207	25.0364
434	chr8	128747150	128747349	238.135	268.209	185.599	153.095	3.65923	H1	promoter	ENSG00000136997	MYC	32.9364	64.1088	26.6507	27.2964
435	chr6	15245800	15245999	102.058	116.912	73.5393	55.8917	3.11911	H1	promoter	ENSG00000008083	JARID2	3.30126	4.58443	3.34912	5.22409
436	chr13	107269600	107269799	54.0307	64.6452	33.8514	21.8707	3.09666	H1	promoter	ENSG00000227590	ATP5G1P5	6.2772	7.41275	5.09465	5.00528
437	chr1	27692350	27692549	66.0375	78.3995	43.1898	31.591	3.04468	H1	intron	ENSG00000142733	MAP3K6	8.65096	4.94637	9.17474	6.44574
438	chr7	92219450	92219649	162.092	182.932	122.566	102.873	3.21986	H1	intron	ENSG00000234545	FAM133B	25.6457	16.183	19.4647	18.1688
439	chr1	86042150	86042349	254.144	287.465	194.938	164.435	3.78624	H1	intron	ENSG00000142867	BCL10	58.9993	61.8367	56.7706	58.4743
440	chr9	131418800	131418999	78.0444	94.9047	47.8589	31.591	3.69991	H1	exon	ENSG00000119333	WDR34	29.7615	23.4511	26.6218	16.731
441	chr16	2564600	2564799	54.0307	67.3961	29.1823	15.3905	3.73789	H1	promoter	ENSG00000185883	ATP6V0C	75.4252	76.8359	82.599	78.4278
442	chr3	170076000	170076199	110.063	130.666	73.5393	52.6516	3.75296	H1	promoter	ENSG00000136603	SKIL	50.4289	68.9417	37.4366	40.331
443	chr14	77386050	77386249	238.135	276.462	169.257	130.414	4.41601	H1	intergenic	ENSG00000241081	RP11-488C13.1	100.504	93.6785	94.7708	120.042
444	chr11	66103550	66103749	146.083	174.68	89.8814	60.7519	4.51244	H1	exon	ENSG00000254756	RP11-867G23.12	0	0	0.330249	0
445	chr5	86563750	86563949	134.076	155.424	92.216	68.8521	3.77451	H1	promoter	ENSG00000145715	RASA1	19.1445	20.648	19.5981	24.0721
446	chr8	42009850	42010049	166.094	188.434	122.566	98.0131	3.54558	H1	promoter	ENSG00000070718	AP3M2	11.8123	18.1243	20.5248	17.627
447	chr20	50073350	50073549	43.6248	52.5414	24.5131	16.6865	3.00265	H1	intron	NA	NA	NA	NA	NA	NA
448	chr22	39651100	39651299	115.399	133.417	77.4303	61.8319	3.49628	H1	intergenic	ENSG00000100311	PDGFB	71.1797	68.48	94.7562	122.726
449	chr1	97187250	97187449	118.067	136.168	80.5431	67.2321	3.35539	H1	promoter	ENSG00000117569	PTBP2	6.18017	7.54418	6.80814	7.82685
450	chr17	17598550	17598749	78.0444	92.1538	47.8589	36.4511	3.39559	H1	intron	ENSG00000108557	RAI1	6.51362	7.26687	6.95923	7.75086
451	chr20	44462400	44462599	74.0421	86.6521	47.8589	38.0712	3.04329	H1	promoter	ENSG00000101470	TNNC2	0	0.381006	0	0
452	chr9	130600450	130600649	94.8539	107.008	66.0687	52.9756	2.96116	H1	intron	ENSG00000106991	ENG	261.084	246.237	198.178	245.337
453	chr12	48152600	48152799	86.0489	97.6556	57.1973	44.5514	3.0928	H1	exon	ENSG00000211584	SLC48A1	15.9088	14.6732	12.3412	15.7713
454	chr9	99180250	99180449	62.0353	75.6487	31.5169	17.0105	3.96773	H1	exon	ENSG00000165244	ZNF367	1.77301	2.50104	1.06757	1.34618
455	chr9	130497450	130497649	90.0512	105.908	54.8627	38.0712	3.75253	H1	exon	ENSG00000160404	TOR2A	6.68391	5.64919	7.26286	4.7553
456	chr11	64637950	64638149	134.076	154.507	89.8814	69.9322	3.75903	H1	intron	ENSG00000110047	EHD1	43.0254	36.6383	43.006	27.0175
457	chr2	85133750	85133949	119.401	137.085	78.9867	61.2919	3.63189	H1	exon	ENSG00000186854	C2orf89	1.5445	1.61098	2.32472	1.12165
458	chr19	6238900	6239099	100.724	120.579	55.6409	35.9111	4.29329	H1	intron	ENSG00000130382	MLLT1	15.6364	14.5689	12.5131	13.4079
459	chr10	114713050	114713249	102.058	116.912	68.8702	51.0316	3.42144	H1	intron	ENSG00000148737	TCF7L2	16.2914	27.9212	19.2139	21.3103
460	chr11	102218000	102218199	98.0557	114.161	64.201	46.1714	3.57597	H1	promoter	ENSG00000110330	BIRC2	119.952	127.827	102.749	108.23
461	chr22	50731800	50731999	50.0284	59.1435	26.8477	15.3905	3.43388	H1	intron	ENSG00000196576	PLXNB2	47.6774	43.8666	50.9886	58.0506
462	chr4	89444550	89444749	110.063	130.666	59.5318	33.211	4.59242	H1	intron	ENSG00000138641	HERC3	8.9615	6.60423	7.65053	6.70606
463	chr4	77069200	77069399	114.065	133.417	66.5356	41.3113	4.33538	H1	intron	ENSG00000138750	NUP54	52.9047	42.3952	48.0661	33.9435
464	chr13	45508500	45508699	50.0284	59.1435	31.5169	18.6306	3.0586	H1	intergenic	ENSG00000083635	NUFIP1	1.82044	1.88307	1.47159	1.30795
465	chr12	52298450	52298649	86.0489	100.406	54.8627	34.8311	3.67446	H1	intergenic	ENSG00000139567	ACVRL1	98.3704	93.6015	83.1989	99.8446
466	chr5	17123800	17123999	18.0102	23.3823	8.17104	0.810025	3.00907	H1	intergenic	ENSG00000206814	Y_RNA	0	2.99334	0	0
467	chr22	37309700	37309899	142.081	163.676	106.223	80.1925	3.48484	H1	promoter	ENSG00000100368	CSF2RB	7.94072	7.42832	10.6574	9.71324
468	chr16	66907950	66908149	30.0171	37.1366	15.1748	4.05013	3.35207	H1	intergenic	ENSG00000172840	PDP2	3.25686	1.93219	3.24875	3.7445
469	chr4	141016550	141016749	478.272	524.039	384.039	315.1	4.37085	H1	intron	ENSG00000178458	H3F3AP6	137.286	115.732	127.411	120.264
470	chr4	129444050	129444249	50.0284	59.1435	29.1823	13.7704	3.46118	H1	intergenic	ENSG00000248187	RP11-184M15.1	1.49857	1.60906	1.54621	0.91797
471	chr16	68298150	68298349	150.085	169.178	108.558	76.9524	3.76707	H1	promoter	ENSG00000103064	SLC7A6	15.0335	14.8234	17.3156	16.5378
472	chr1	32155750	32155949	106.06	125.164	73.5393	46.1714	3.79989	H1	intron	ENSG00000084636	COL16A1	0.576201	0.542569	0.983611	0.303609
473	chr7	5602200	5602399	110.063	125.164	80.5431	55.8917	3.3579	H1	intergenic	ENSG00000075624	ACTB	17027.9	17045.9	14977	14889.2
474	chr15	83875650	83875849	126.072	141.669	80.5431	51.0316	4.11584	H1	intron	ENSG00000166503	AC024270.1	47.3575	45.5455	45.6966	52.528
475	chr9	74979000	74979199	198.113	224.195	129.569	85.0526	4.66448	H1	intron	ENSG00000107372	ZFAND5	84.7953	84.5486	91.974	93.4888
476	chr1	51702100	51702299	50.0284	59.1435	26.8477	10.5303	3.73476	H1	promoter	ENSG00000123091	RNF11	69.9725	78.1907	82.712	81.8089
477	chr5	102091050	102091249	46.0262	53.6418	26.8477	13.7704	3.22859	H1	intergenic	ENSG00000145730	PAM	133.432	135.348	151.882	166.8
478	chr9	35490400	35490599	166.094	182.932	122.566	93.1529	3.56621	H1	promoter	ENSG00000198853	RUSC2	10.298	12.3933	13.7332	10.8508
479	chr1	151254800	151254999	138.078	149.922	103.889	78.5724	3.16974	H1	promoter	ENSG00000143373	ZNF687	9.63672	8.53226	10.2137	8.57589
480	chr2	99952500	99952699	107.394	118.746	76.6521	54.2717	3.26893	H1	intron	ENSG00000115514	TXNDC9	24.1943	24.1487	27.9278	30.3635
481	chr9	33167700	33167899	130.074	144.42	92.216	63.992	3.62995	H1	intergenic	ENSG00000086062	B4GALT1	33.53	38.2635	46.683	46.8087
482	chr20	36783300	36783499	66.0375	75.6487	43.1898	25.1108	3.30449	H1	intron	ENSG00000198959	TGM2	423.948	396.201	355.729	289.933
483	chr3	195622250	195622449	70.0398	81.1504	43.1898	20.2506	3.80493	H1	exon	ENSG00000061938	TNK2	14.5441	17.3833	18.5762	19.8234
484	chr17	71338550	71338749	94.0535	108.659	57.1973	26.7308	4.25271	H1	intron	ENSG00000179604	CDC42EP4	7.92755	6.75096	6.99639	6.26178
485	chr2	43301500	43301699	118.067	127.915	82.8777	60.7519	3.31708	H1	intergenic	ENSG00000231826	AC016735.2	0	0	0	0.00672334
486	chr9	123837300	123837499	110.063	119.662	73.5393	52.6516	3.46323	H1	intergenic	NA	NA	NA	NA	NA	NA
487	chr12	53298100	53298299	58.033	64.6452	33.8514	20.2506	3.28241	H1	intron	ENSG00000111057	KRT18	99.7921	82.9563	73.2009	45.6665
488	chr11	69080550	69080749	182.103	199.437	122.566	88.2927	4.17412	H1	intergenic	ENSG00000172927	MYEOV	39.8192	40.4229	31.7562	17.9085
489	chr19	42724450	42724649	102.058	111.41	71.2048	52.6516	3.13559	H1	promoter	ENSG00000167625	ZNF526	5.29406	3.87541	8.02702	5.4654
490	chr20	37082050	37082249	206.117	235.199	134.238	93.1529	4.66323	H1	intergenic	ENSG00000174365	SNHG11	6.86706	7.95535	8.36522	5.42344
491	chr2	240323500	240323699	158.09	174.68	110.893	83.4326	3.74662	H1	intergenic	ENSG00000068024	HDAC4	4.07108	5.06637	4.50731	5.68134
492	chr11	101982350	101982549	170.097	191.185	110.893	76.9524	4.33613	H1	promoter	ENSG00000137693	YAP1	15.7984	14.1811	14.162	12.0175
493	chr3	157248750	157248949	99.3898	107.742	68.8702	53.1917	2.99404	H1	intergenic	ENSG00000197415	VEPH1	153.203	127.616	110.539	85.0146
494	chr8	57906400	57906599	22.0125	26.1332	8.17104	0.810025	3.28992	H1	exon	ENSG00000104331	IMPAD1	34.3796	36.1027	39.2899	44.182
495	chr17	48123850	48124049	66.0375	75.6487	36.186	20.2506	3.74336	H1	intergenic	ENSG00000246640	RP11-1094H24.4	0.0794656	0.016528	0	0.0282667
496	chr14	21944800	21944999	82.0466	92.1538	47.8589	31.591	3.67378	H1	intron	ENSG00000092203	TOX4	64.3075	74.3051	70.9121	41.0143
497	chr4	1340100	1340299	78.0444	89.403	40.8552	23.4907	4.04656	H1	promoter	ENSG00000163945	KIAA1530	1.6838	2.0444	1.95328	1.79849
498	chr4	83294650	83294849	102.058	116.912	59.5318	38.0712	4.08272	H1	exon	ENSG00000138668	HNRNPD	425.377	402.466	430.516	352.822
499	chr6	30710750	30710949	166.094	180.181	122.566	101.253	3.25266	H1	promoter	ENSG00000137312	FLOT1	84.2509	79.1632	67.2982	73.4663
500	chr5	95907850	95908049	42.0239	48.1401	19.8439	10.5303	3.40222	H1	intergenic	NA	NA	NA	NA	NA	NA
501	chr16	89388150	89388349	166.094	182.932	101.554	75.3323	4.32282	H1	intron	NA	NA	NA	NA	NA	NA
502	chr6	43596650	43596849	194.11	207.69	136.573	109.353	3.75017	H1	intron	ENSG00000172432	GTPBP2	59.4805	73.8266	67.352	61.0857
503	chr12	58335500	58335699	90.0512	97.6556	57.1973	42.9313	3.24605	H1	promoter	ENSG00000166896	XRCC6BP1	5.26777	2.991	4.51973	3.72821
504	chr20	1549150	1549349	82.0466	89.403	52.5281	39.6912	3.08568	H1	intron	ENSG00000125900	SIRPD	2.76e-06	0	0	0.0373271
505	chr20	61568900	61569099	206.117	226.946	108.558	65.612	5.29624	H1	intron	ENSG00000101191	DIDO1	19.5874	16.4966	18.474	18.1508
506	chr14	23584450	23584649	74.0421	81.1504	40.8552	26.7308	3.61256	H1	intergenic	ENSG00000100813	ACIN1	158.478	130.739	146.476	125.421
507	chrX	39868200	39868399	18.0102	20.6315	5.83646	0.810025	3.00139	H1	intergenic	ENSG00000223486	AC092198.1	0.0297952	0.0154957	0	0.0529985
508	chr6	151362800	151362999	190.108	199.437	136.573	119.074	3.27339	H1	intron	NA	NA	NA	NA	NA	NA
509	chr1	174968450	174968649	354.201	375.493	243.964	204.936	4.54949	H1	promoter	ENSG00000116161	CACYBP	140.091	120.59	101.745	85.2311
510	chr10	28822300	28822499	42.0239	48.1401	12.8402	2.43008	4.22149	H1	promoter	ENSG00000095787	WAC	113.769	110.522	112.407	119.139
511	chr14	77427750	77427949	166.094	180.181	96.8852	72.0922	4.41874	H1	intergenic	ENSG00000243225	RP11-7F17.1	0.160519	0.428664	1.18976	1.85889
512	chr8	107282700	107282899	146.083	155.424	92.216	70.4722	3.87207	H1	promoter	ENSG00000164830	OXR1	6.91814	7.29484	6.03604	10.9855
513	chr22	29168750	29168949	130.074	136.168	87.5468	72.0922	3.22135	H1	promoter	ENSG00000159873	CCDC117	14.0114	13.9531	15.0953	15.9846
514	chr2	220025050	220025249	58.033	61.8944	31.5169	21.8707	3.15877	H1	promoter	ENSG00000187736	NHEJ1	13.6687	14.5014	14.972	13.5524
515	chr12	123964150	123964349	230.131	240.7	173.926	136.894	3.60685	H1	intron	ENSG00000184209	SNRNP35	24.4106	27.7836	27.4676	21.7479
516	chr6	136610000	136610199	170.097	180.181	103.889	55.8917	4.74737	H1	intron	ENSG00000029363	BCLAF1	114.02	120.273	112.616	112.149
517	chr3	129313350	129313549	134.076	141.669	94.5506	65.612	3.53415	H1	intron	ENSG00000004399	PLXND1	368.368	370.156	426.614	506.071
518	chr14	59655500	59655699	90.0512	97.6556	64.201	42.9313	3.08637	H1	promoter	ENSG00000100592	DAAM1	24.5979	25.6319	33.0386	26.1536
519	chr19	11253800	11253999	128.74	137.085	97.6634	71.5522	3.05359	H1	intergenic	ENSG00000161888	SPC24	52.4735	46.2519	39.4563	22.7798
520	chr14	100224550	100224749	98.0557	103.157	66.5356	41.3113	3.43703	H1	intergenic	ENSG00000066629	EML1	29.6155	27.2824	28.1055	23.2198
521	chr1	67395900	67396099	78.0444	83.9013	52.5281	31.591	3.24576	H1	intron	ENSG00000198160	MIER1	18.5047	19.9294	15.3346	12.0292
522	chr14	91976250	91976449	86.0489	92.1538	57.1973	33.211	3.47061	H1	intron	ENSG00000100796	SMEK1	92.185	84.678	75.638	71.7059
523	chr16	31470050	31470249	178.101	185.683	141.242	110.973	2.96152	H1	promoter	ENSG00000140691	ARMC5	3.05385	4.42795	3.64048	3.53727
524	chr12	125076450	125076649	75.3762	82.0674	44.7462	27.8109	3.51148	H1	intergenic	ENSG00000196498	NCOR2	56.5258	60.4064	65.1262	39.9603
525	chrX	49028750	49028949	62.0353	67.3961	36.186	21.8707	3.30569	H1	promoter	ENSG00000102007	PLP2	139.791	135.505	117.294	87.7981
526	chr1	153505750	153505949	158.09	169.178	96.8852	65.612	4.32023	H1	intergenic	ENSG00000238279	BX470102.3	1.4518	2.2265	0.916635	0.730095
527	chr5	176793700	176793899	78.0444	83.9013	43.1898	26.7308	3.70621	H1	exon	ENSG00000169220	RGS14	3.39106	2.33012	3.22814	2.58538
528	chr17	29923250	29923449	146.083	155.424	93.7724	69.3922	3.87844	H1	intergenic	ENSG00000228768	AC003101.1	1.03504	3.68595	1.37434	1.81618
529	chr11	507100	507299	134.076	138.918	92.216	73.7123	3.2112	H1	exon	ENSG00000023191	RNH1	70.4062	68.2296	69.9964	55.4489
530	chr8	17468200	17468399	90.0512	94.9047	50.1935	33.211	3.76389	H1	intron	ENSG00000104213	PDGFRL	11.0405	7.68011	9.20065	7.15258
531	chr12	120703150	120703349	106.06	108.659	66.5356	49.4115	3.38397	H1	intron	ENSG00000089159	PXN	141.383	137.422	112.437	87.6489
532	chr8	129061700	129061899	78.0444	82.0674	46.3025	31.051	3.36631	H1	intron	NA	NA	NA	NA	NA	NA
533	chr1	39324800	39324999	70.0398	72.8978	40.8552	26.7308	3.27018	H1	intron	ENSG00000116954	RRAGC	22.4116	22.1541	20.9382	28.609
534	chr11	61595050	61595249	146.083	149.922	99.2197	76.9524	3.44072	H1	promoter	ENSG00000134824	FADS2	346.268	336.994	367.057	353.713
535	chr6	36098450	36098649	98.0557	103.157	61.8664	41.3113	3.52446	H1	promoter	ENSG00000156711	MAPK13	4.70006	5.35883	6.28521	5.09177
536	chr8	110345750	110345949	138.078	144.42	85.2122	57.5118	4.05147	H1	promoter	ENSG00000120526	NUDCD1	24.6589	23.9968	19.0827	20.3969
537	chr8	71519700	71519899	114.065	119.662	75.8739	55.8917	3.35993	H1	promoter	ENSG00000067167	TRAM1	74.2893	89.3335	109.618	99.6529
538	chr12	56552850	56553049	128.74	129.749	83.6559	59.6719	3.57988	H1	promoter	ENSG00000092841	MYL6	10802.3	9619.1	12064.5	10629.9
539	chr6	30457700	30457899	174.099	180.181	113.227	76.9524	4.18136	H1	promoter	ENSG00000204592	HLA-E	147.311	163.201	185.938	159.492
540	chr10	103454250	103454449	126.072	130.666	68.8702	39.6912	4.43478	H1	exon	ENSG00000107829	FBXW4	7.94744	6.4731	8.263	6.55563
541	chr11	65782650	65782849	99.3898	102.24	66.5356	48.8715	3.08572	H1	intergenic	ENSG00000175315	CST6	0.509197	0.262329	0.449072	0.450244
542	chrX	49023200	49023399	154.088	191.185	94.5506	133.654	3.50377	H1	exon	ENSG00000017621	MAGIX	0.395183	0.296636	0.340952	0.649934
543	chr20	62317750	62317949	246.14	301.219	157.584	214.657	3.97053	H1	intron	ENSG00000026036	RTEL1	1.02956	2.21045	0.993214	0.984656
544	chr1	245026650	245026849	46.0262	64.6452	3.50187	29.9709	4.21919	H1	intron	ENSG00000153187	HNRNPU	179.005	181.459	166.19	170.837
545	chr5	76383100	76383299	158.09	199.437	78.2085	125.554	4.22761	H1	promoter	ENSG00000250615	CTC-564N23.2	6.86304	8.97604	10.3414	7.43849
546	chrX	64822350	64822549	130.074	160.925	73.5393	109.353	3.5064	H1	intergenic	ENSG00000231669	RP11-368D24__A.1	0.351986	0.415099	0	0
547	chr17	17743450	17743649	66.0375	86.6521	26.8477	51.0316	3.46085	H1	intergenic	ENSG00000072310	SREBF1	34.9613	47.7	41.4343	50.9703
548	chr15	91412350	91412549	64.7034	81.1504	31.5169	47.7915	3.02518	H1	promoter	ENSG00000140564	FURIN	45.3773	39.6304	52.1482	42.8224
549	chr2	120980800	120980999	106.06	130.666	54.8627	80.1925	3.52408	H1	exon	ENSG00000226479	TMEM185B	14.151	15.9409	14.2852	13.2431
550	chr9	115095750	115095949	78.0444	97.6556	38.5206	59.1318	3.23298	H1	exon	ENSG00000213529	RP11-432F4.2	0	0	0.094735	0.0933854
551	chr17	4046650	4046849	162.092	196.687	85.2122	125.554	4.01146	H1	promoter	ENSG00000167740	CYB5D2	7.77302	8.58896	9.26297	7.71265
552	chr9	93955500	93955699	226.129	279.212	143.577	185.496	4.00607	H1	intergenic	ENSG00000230147	RP11-305L7.5	0	0	0	0.0130883
553	chr4	99916300	99916499	102.058	136.168	43.1898	73.7123	4.14967	H1	promoter	ENSG00000164024	METAP1	49.9877	49.3634	49.9028	47.0109
554	chr7	1498150	1498349	118.067	155.424	54.8627	86.6727	4.158	H1	intron	ENSG00000164877	MICALL2	8.59801	7.24217	7.04887	8.3158
555	chr3	193855300	193855499	178.101	221.444	106.223	141.754	3.91264	H1	intron	ENSG00000114315	HES1	92.0888	129.129	50.1923	117.468
556	chr8	97274400	97274599	50.0284	67.3961	22.1785	38.0712	3.0378	H1	promoter	ENSG00000156471	PTDSS1	86.9572	70.8502	78.5225	75.8847
557	chr7	72996800	72996999	70.0398	92.1538	31.5169	52.6516	3.42883	H1	intergenic	ENSG00000106638	TBL2	24.2688	21.9842	28.8977	19.9231
558	chrX	152756750	152756949	54.0307	70.147	24.5131	41.3113	2.97732	H1	intergenic	ENSG00000183479	TREX2	0	0.11524	0.0988247	0
559	chr11	128391600	128391799	322.183	378.243	236.96	277.839	3.59604	H1	intron	ENSG00000134954	ETS1	81.768	126.35	196.96	148.758
560	chr18	29522600	29522799	114.065	158.175	47.8589	78.5724	4.49868	H1	exon	ENSG00000153339	TRAPPC8	4.28046	4.44049	4.37371	5.82132
561	chr1	19250550	19250749	90.0512	119.662	47.8589	68.8521	3.52649	H1	intron	ENSG00000159423	ALDH4A1	6.92788	5.53096	5.20436	5.80159
562	chr1	65532600	65532799	66.0375	92.1538	31.5169	49.4115	3.47456	H1	intergenic	ENSG00000231485	RP4-535B20.1	1.32643	2.89479	4.73265	1.83216
563	chr8	22462550	22462749	126.072	155.424	71.2048	96.393	3.56676	H1	promoter	ENSG00000158941	KIAA1967	164.807	181.9	164.028	136.93
564	chr10	49689050	49689249	22.0125	31.6349	3.50187	12.1504	3.09663	H1	intron	NA	NA	NA	NA	NA	NA
565	chr2	183989300	183989499	114.065	149.922	54.8627	80.1925	4.09643	H1	promoter	ENSG00000163002	NUP35	33.6109	22.5834	28.4732	17.4925
566	chr1	21608150	21608349	46.0262	61.8944	19.8439	31.591	3.05393	H1	intron	ENSG00000117298	ECE1	289.012	300.854	312.91	373.891
567	chr10	1034550	1034749	166.094	213.192	82.8777	117.454	4.48179	H1	promoter	ENSG00000107937	GTPBP4	36.6098	48.1932	42.9269	34.6707
568	chr11	118492200	118492399	174.099	210.441	110.893	138.514	3.55985	H1	intron	ENSG00000019144	PHLDB1	81.4874	115.956	131.878	106.457
569	chr6	37102150	37102349	222.126	237.949	124.9	167.675	3.83471	H1	intergenic	ENSG00000137193	PIM1	3.39422	3.97022	2.79707	2.36728
570	chr12	133263750	133263949	30.0171	34.3858	5.83646	15.3905	3.02075	H1	promoter	ENSG00000176894	PXMP2	6.98097	8.52416	7.19372	5.45941
571	chr11	61524150	61524349	50.0284	56.3927	12.8402	28.3509	3.44333	H1	intron	ENSG00000124915	RP11-467L20.10	0.127677	0	0	0
572	chr6	27777950	27778149	142.081	155.424	82.8777	110.973	3.10455	H1	promoter	ENSG00000196747	HIST1H2AI	0	0	0.183306	0
573	chr7	75922550	75922749	190.108	204.939	122.566	154.715	3.02132	H1	intergenic	ENSG00000106211	HSPB1	719.515	665.984	691.368	588.404
574	chr17	46689400	46689599	90.0512	100.406	43.1898	65.612	3.13516	H1	promoter	ENSG00000248304	AC103702.1	0.0558905	0	0	0
575	chr16	71323050	71323249	138.078	152.673	78.2085	107.733	3.20138	H1	exon	ENSG00000180917	FTSJD1	5.01736	4.35367	4.08105	4.38173
576	chr22	45608350	45608549	62.0353	72.8978	15.1748	38.0712	3.81713	H1	intron	ENSG00000100364	KIAA0930	20.9844	20.0764	15.9157	20.8818
577	chr1	28285700	28285899	34.0193	39.8875	5.83646	20.2506	3.20753	H1	promoter	ENSG00000130768	SMPDL3B	0.417613	0.362993	0.156962	0.118454
578	chr22	31365700	31365899	106.06	119.662	54.8627	81.8125	3.1651	H1	promoter	NA	NA	NA	NA	NA	NA
579	chr18	29522550	29522749	150.085	177.431	43.1898	98.0131	4.90807	H1	intron	ENSG00000153339	TRAPPC8	4.28046	4.44049	4.37371	5.82132
580	chr6	158430700	158430899	130.074	158.175	68.8702	96.393	3.74325	H1	intron	ENSG00000078269	SYNJ2	17.5078	21.5241	25.4168	10.7212
581	chr9	131314150	131314349	242.138	279.212	155.25	190.356	3.79494	H1	promoter	ENSG00000228395	RP11-216B9.6	1.38615	1.73794	0.975065	3.02847
582	chr6	2765750	2765949	94.0535	111.41	50.1935	68.8521	3.17076	H1	promoter	ENSG00000145949	MYLK4	0.244401	0.1841	0.154795	0.168473
583	chr1	150124600	150124799	166.094	191.185	99.2197	127.174	3.51034	H1	intron	ENSG00000023902	PLEKHO1	57.7223	69.426	92.6217	84.2235
584	chr9	38066900	38067099	114.065	136.168	52.5281	78.5724	3.85259	H1	intron	ENSG00000107338	SHB	9.03135	10.6156	7.68392	5.10874
585	chr19	48814050	48814249	66.0375	81.1504	19.8439	39.6912	3.84754	H1	intron	ENSG00000105479	CCDC114	0	0.0205265	0.205287	0.104549
586	chr17	56083700	56083899	98.0557	119.662	36.186	63.992	4.09483	H1	exon	ENSG00000136450	SRSF1	87.7693	81.7091	82.6772	76.7111
587	chr1	38465000	38465199	148.751	168.261	92.9942	121.234	3.01923	H1	exon	ENSG00000183386	FHL3	35.792	33.1372	32.8673	35.3403
588	chr8	38033500	38033699	106.06	125.164	50.1935	76.9524	3.59533	H1	promoter	ENSG00000147465	STAR	0.0377879	0.0653578	0	0.0204694
589	chr16	87998100	87998299	82.0466	100.406	31.5169	55.8917	3.75046	H1	intron	ENSG00000172530	BANP	12.7635	7.33386	13.5197	9.98403
590	chr5	154237200	154237399	282.16	334.23	138.908	222.757	4.84569	H1	promoter	ENSG00000170271	C5orf4	5.06498	3.63941	3.17091	3.2218
591	chr2	69533550	69533749	134.076	152.673	75.8739	107.733	3.24305	H1	intergenic	ENSG00000198380	GFPT1	18.2115	20.1388	36.3991	26.0584
592	chr3	4910550	4910749	146.083	171.929	75.8739	114.214	3.75926	H1	intergenic	ENSG00000235947	EGOT	0.117272	0.303917	0.572345	0.21116
593	chr16	89788250	89788449	86.0489	92.1538	19.8439	51.0316	4.17942	H1	promoter	ENSG00000158805	ZNF276	4.9622	5.4684	5.73379	5.04601
594	chr20	48762550	48762749	70.0398	75.6487	17.5094	41.3113	3.83276	H1	intron	ENSG00000240849	TMEM189	46.0127	42.2794	50.4716	46.6618
595	chr15	22833500	22833699	94.0535	94.9047	31.5169	59.1318	3.73788	H1	promoter	ENSG00000153575	TUBGCP5	10.7729	7.21598	8.26306	5.84393
596	chr3	50375200	50375399	126.072	130.666	54.8627	86.6727	3.6822	H1	intron	ENSG00000068028	RASSF1	11.0253	12.2844	15.6833	8.93255
597	chr9	137299600	137299799	98.0557	100.406	33.8514	62.3719	3.77361	H1	intron	ENSG00000186350	RXRA	9.32432	9.39429	7.24168	7.53367
598	chr1	236165450	236165649	174.099	177.431	103.889	135.274	3.04428	H1	intron	ENSG00000229291	RP4-580N22.2	1.03615	0	0	0
599	chr1	244997400	244997599	170.097	174.68	73.5393	117.454	4.09924	H1	intergenic	ENSG00000203667	FAM36A	64.9212	54.8437	52.7284	48.1554
600	chr1	87493450	87493649	54.0307	56.3927	17.5094	36.4511	2.98957	H1	intron	NA	NA	NA	NA	NA	NA
601	chr6	3806300	3806499	198.113	202.188	122.566	161.195	3.01589	H1	intergenic	ENSG00000145945	FAM50B	4.30525	2.52563	2.70199	2.28031
602	chr16	70834500	70834699	126.072	130.666	45.5244	86.6727	4.02072	H1	intron	ENSG00000103043	VAC14	13.7133	14.1909	12.657	11.2086
603	chr19	11200600	11200799	174.099	182.932	101.554	141.754	3.17984	H1	promoter	ENSG00000130164	LDLR	103.269	117.378	139.033	109.347
604	chr1	156630850	156631049	167.428	178.347	95.3288	134.194	3.28083	H1	intergenic	ENSG00000229953	RP11-284F21.7	1.07293	1.73119	0.562296	1.20485
605	chr17	41855950	41856149	126.072	138.918	50.1935	93.1529	3.94127	H1	intron	ENSG00000108861	DUSP3	26.0825	30.2401	34.7997	29.9658
606	chr7	87849650	87849849	154.088	152.673	80.5431	117.454	3.26515	H1	intron	ENSG00000075142	SRI	166.52	139.334	149.98	134.437
607	chr15	69110650	69110849	138.078	141.669	50.1935	99.6331	4.07991	H1	intron	NA	NA	NA	NA	NA	NA
608	chr21	46740750	46740949	82.0466	83.9013	19.8439	55.8917	3.88931	H1	intergenic	ENSG00000184274	LINC00315	0.0697693	0.0544009	0.122744	0.0620325
609	chr16	66637900	66638099	86.0489	83.9013	22.1785	59.1318	3.81341	H1	promoter	ENSG00000140931	CMTM3	38.7786	36.0658	38.9482	48.6373
610	chr22	42084700	42084899	114.065	114.161	50.1935	86.6727	3.32919	H1	intron	ENSG00000100138	NHP2L1	123.213	107.078	115.063	90.4732
611	chr7	73686300	73686499	234.133	232.448	136.573	188.736	3.41873	H1	intergenic	ENSG00000106665	CLIP2	9.52773	10.0617	8.56297	11.3928
612	chr8	103424200	103424399	62.0353	61.8944	19.8439	42.9313	3.10103	H1	intron	ENSG00000104517	UBR5	31.1479	26.7721	38.9268	37.2516
613	chr1	1148200	1148399	46.0262	50.8909	8.17104	31.591	3.42729	H1	intron	ENSG00000186827	TNFRSF4	2.2401	2.49383	2.50708	1.38474
614	chr19	13276450	13276649	106.06	114.161	52.5281	85.0526	3.07992	H1	intergenic	ENSG00000213253	CTC-250I14.1	3.01102	2.51846	2.7476	2.03179
615	chr19	16987350	16987549	66.0375	72.8978	12.8402	44.5514	3.89377	H1	exon	ENSG00000127533	F2RL3	0.953227	5.32383	1.54776	1.48692
616	chr1	167191450	167191649	126.072	138.918	57.1973	102.873	3.6045	H1	intron	ENSG00000143190	POU2F1	10.7757	12.3972	15.1204	12.3484
617	chr3	183415800	183415999	106.06	114.161	50.1935	88.2927	3.17436	H1	promoter	ENSG00000163872	YEATS2	25.216	22.2308	30.6305	33.0252
618	chr14	45723100	45723299	166.094	188.434	106.223	164.435	2.98112	H1	intergenic	ENSG00000129534	MIS18BP1	18.4796	19.3893	22.9987	17.4244
619	chr2	37875350	37875549	214.122	232.448	99.2197	193.596	4.24727	H1	intron	ENSG00000163171	CDC42EP3	15.6076	23.2295	11.3546	18.1034
620	chr5	61602550	61602749	74.0421	83.9013	22.1785	63.992	3.59386	H1	promoter	ENSG00000068796	KIF2A	50.7359	39.5964	40.5602	50.7369
621	chr12	122228600	122228799	26.0148	37.1366	3.50187	20.2506	3.17869	H1	intron	ENSG00000089053	ANAPC5	105.913	108.806	117.25	96.8351
622	chr5	14872250	14872449	38.0216	48.1401	8.17104	33.211	3.17841	H1	intergenic	ENSG00000154122	ANKH	9.26505	12.9853	14.6384	11.0526
623	chr1	235184000	235184199	186.106	210.441	117.896	170.915	3.16278	H1	intergenic	ENSG00000238005	RP11-443B7.1	0.758469	1.26002	0	9.02e-06
624	chr2	110457300	110457499	62.0353	81.1504	15.1748	51.0316	3.87678	H1	intergenic	ENSG00000233307	AC109815.2	0.673022	1.20232	1.3172	1.04623
625	chr15	66663250	66663449	30.0171	37.1366	3.50187	21.8707	3.18352	H1	intergenic	ENSG00000240821	RP11-352G18.1	16.3932	13.5711	14.6319	16.8272
626	chr20	37434600	37434799	150.085	166.427	85.2122	128.794	3.22102	H1	promoter	ENSG00000101445	PPP1R16B	31.3791	46.0485	48.9149	38.9644
627	chr6	158589300	158589499	94.0535	108.659	47.8589	76.9524	3.05889	H1	promoter	ENSG00000122335	SERAC1	3.46386	3.8538	4.70072	4.26865
628	chr6	167104750	167104949	110.063	127.915	52.5281	88.2927	3.4749	H1	intron	NA	NA	NA	NA	NA	NA
629	chr7	139761950	139762149	142.081	169.178	52.5281	107.733	4.42393	H1	intron	ENSG00000059378	PARP12	37.0133	33.2169	32.2389	28.866
630	chr9	130606650	130606849	126.072	144.42	71.2048	106.113	3.1338	H1	intron	ENSG00000106991	ENG	261.084	246.237	198.178	245.337
631	chr19	45595600	45595799	58.033	70.147	22.1785	44.5514	3.11634	H1	promoter	ENSG00000104866	PPP1R37	7.71853	5.98747	11.0482	7.49361
632	chr5	38556900	38557099	130.074	155.424	61.8664	106.113	3.80472	H1	intron	ENSG00000244968	MIR3650	0.196397	0.247452	0.292445	0.113753
633	chr8	80695900	80696099	110.063	133.417	50.1935	91.5329	3.68493	H1	intergenic	ENSG00000164683	HEY1	1.875	6.7845	4.06051	2.41736
634	chr3	12965250	12965449	62.0353	56.3927	10.5056	31.591	3.81531	H1	intron	ENSG00000144713	RPL32	634.241	563.278	606.493	538.887
635	chr4	141677400	141677599	94.0535	86.6521	31.5169	55.8917	3.63636	H1	exon	ENSG00000109436	TBC1D9	22.3673	22.4771	27.5491	21.6305
636	chr17	40761150	40761349	142.081	133.417	64.201	94.773	3.58092	H1	promoter	ENSG00000141699	FAM134C	17.6068	13.3043	16.6472	18.382
637	chr9	125579450	125579649	42.0239	37.1366	8.17104	20.2506	3.17454	H1	promoter	ENSG00000136940	PDCL	33.0533	37.4486	25.7624	29.6897
638	chr12	110433800	110433999	118.067	108.659	52.5281	75.3323	3.36915	H1	intron	ENSG00000139436	GIT2	30.9236	26.7997	32.0128	38.8506
639	chr20	3788600	3788799	186.106	174.68	110.114	137.974	2.99019	H1	intergenic	ENSG00000125843	C20orf29	10.0086	8.9335	8.40706	8.40054
640	chr18	33709400	33709599	194.11	180.181	99.2197	135.274	3.62489	H1	promoter	ENSG00000134759	ELP2	80.1535	84.2646	94.2272	88.6526
641	chr19	54974650	54974849	110.063	103.157	43.1898	72.0922	3.52669	H1	exon	ENSG00000182909	LENG9	0.70441	0.537954	0.449553	0.323028
642	chr15	40627650	40627849	58.033	53.6418	15.1748	34.8311	3.24995	H1	exon	ENSG00000188549	C15orf52	19.4733	17.3394	18.4086	22.812
643	chr12	50057850	50058049	378.215	358.987	204.276	282.699	4.36456	H1	intron	ENSG00000110844	PRPF40B	10.4217	7.69205	12.384	7.78928
644	chr10	105668000	105668199	94.0535	93.0708	43.968	63.992	2.99772	H1	intron	ENSG00000107960	OBFC1	8.73002	6.68135	7.15246	7.19808
645	chr10	99094350	99094549	74.0421	72.8978	24.5131	44.5514	3.40627	H1	exon	ENSG00000225850	RP11-452K12.4	0.241201	0	0.422655	0.539963
646	chr12	120678150	120678349	146.083	141.669	80.5431	109.353	2.97605	H1	intron	ENSG00000089159	PXN	141.383	137.422	112.437	87.6489
647	chr12	25056100	25056299	206.117	202.188	101.554	148.235	3.90212	H1	intron	ENSG00000060982	BCAT1	145.197	153.744	150.998	131.728
648	chr12	124852500	124852699	58.033	56.3927	15.1748	33.211	3.36066	H1	intron	ENSG00000214650	RP11-83B20.1	0.0338473	0.105165	0	0.120553
649	chr22	50912500	50912699	62.0353	64.6452	17.5094	33.211	3.55995	H1	intron	ENSG00000100241	SBF1	12.8607	9.70435	9.10889	12.9043
650	chr12	57081600	57081799	198.113	202.188	110.893	141.754	3.59923	H1	intron	ENSG00000110958	PTGES3	78.784	72.0977	67.1675	72.4319
651	chr14	58764550	58764749	366.208	375.493	227.622	272.979	4.06587	H1	intron	ENSG00000139971	C14orf37	1.24847	4.57131	1.75323	3.96137
652	chr9	134609600	134609799	342.194	345.233	243.964	276.219	3.05314	H1	intron	ENSG00000107263	RAPGEF1	54.1752	62.2193	95.2091	95.2159
653	chr16	28834650	28834849	106.06	108.659	54.8627	72.0922	3.01916	H1	promoter	ENSG00000168488	ATXN2L	32.4404	33.0223	33.4957	34.1935
654	chr16	87872700	87872899	50.0284	50.8909	10.5056	25.1108	3.51807	H1	intron	ENSG00000103257	SLC7A5	6.36185	9.19222	9.86714	5.4499
655	chr15	45018400	45018599	146.083	149.922	66.5356	98.0131	3.80352	H1	intergenic	ENSG00000185880	TRIM69	14.8828	12.8629	15.5553	10.4639
656	chr9	27573550	27573749	174.099	177.431	71.2048	112.594	4.29757	H1	intron	ENSG00000147894	C9orf72	3.86351	4.8143	3.04115	3.61128
657	chr19	39177550	39177749	58.033	59.1435	17.5094	33.211	3.28569	H1	intron	ENSG00000130402	ACTN4	325.172	329.358	370.076	564.999
658	chr6	159239700	159239899	42.0239	42.6383	3.50187	18.6306	3.76926	H1	intron	ENSG00000092820	EZR	83.6075	74.4778	72.9235	79.254
659	chr7	27206450	27206649	378.215	391.998	215.949	276.219	4.4875	H1	intron	ENSG00000253187	RP1-170O19.6	15.4009	7.741	8.81753	11.7106
660	chr15	69453100	69453299	154.088	160.925	54.8627	93.1529	4.47605	H1	intron	ENSG00000138604	GLCE	43.0897	38.8986	34.7224	36.7264
661	chr6	36792350	36792549	306.174	323.226	138.908	206.556	4.94928	H1	intron	NA	NA	NA	NA	NA	NA
662	chr12	66219100	66219299	66.0375	70.147	15.1748	36.4511	3.8437	H1	intron	ENSG00000149948	HMGA2	52.6565	31.8166	61.8255	34.4976
663	chr2	113032750	113032949	286.163	273.711	162.253	191.976	4.016	H1	promoter	ENSG00000188177	ZC3H6	2.73595	2.56597	2.52124	4.24127
664	chr10	3138350	3138549	192.776	176.514	75.8739	104.493	4.52099	H1	intron	ENSG00000067057	PFKP	178.216	164.678	145.263	152.474
665	chr14	53173700	53173899	182.103	171.929	94.5506	117.454	3.6575	H1	promoter	ENSG00000100519	PSMC6	110.893	89.5396	116.99	90.9864
666	chr1	59369600	59369799	82.0466	76.5656	36.9642	48.3315	2.96003	H1	intergenic	ENSG00000232453	RP4-794H19.1	2.31034	1.08559	0.317439	0.191886
667	chr22	31639100	31639299	42.0239	38.0536	10.5056	18.6306	3.07373	H1	intron	ENSG00000182541	LIMK2	35.778	34.7464	43.7879	35.3695
668	chr1	212459250	212459449	110.063	103.157	38.5206	60.7519	3.90747	H1	promoter	ENSG00000066027	PPP2R5A	17.8109	16.5596	13.9143	17.8614
669	chr19	7694850	7695049	190.108	180.181	92.216	120.694	3.92565	H1	promoter	ENSG00000229833	C19orf79	221.805	212.948	207.421	199.972
670	chr20	30110800	30110999	66.0375	61.8944	24.5131	36.4511	3.08362	H1	intron	ENSG00000101294	HM13	119.063	104.632	127.598	130.857
671	chr14	105668700	105668899	66.0375	59.1435	15.1748	31.591	3.71693	H1	intergenic	ENSG00000179364	PACS2	21.1135	20.5523	19.6126	22.3099
672	chr1	223276250	223276449	414.235	383.745	190.268	251.918	5.1925	H1	intergenic	ENSG00000187554	TLR5	0.0479379	0.0735183	0.0337198	0.439957
673	chr19	1249350	1249549	106.06	97.6556	40.8552	60.7519	3.63242	H1	promoter	ENSG00000167470	MIDN	22.2577	46.3543	29.5984	29.3077
674	chr9	4741400	4741599	38.0216	34.3858	8.17104	17.0105	3.043	H1	intron	ENSG00000147853	AK3	24.9263	23.3556	25.2569	28.8568
675	chr2	112689200	112689399	38.0216	34.3858	8.17104	17.0105	3.043	H1	intron	ENSG00000153208	MERTK	37.8959	41.8995	26.082	38.6514
676	chr7	30028500	30028699	166.094	163.676	85.2122	110.973	3.60385	H1	intron	ENSG00000106080	FKBP14	20.2671	19.1307	20.0632	24.5531
677	chr17	66433400	66433599	30.0171	28.884	3.50187	12.1504	3.17685	H1	intron	ENSG00000070540	WIPI1	27.5393	26.1616	33.0955	29.4503
678	chr10	104394500	104394699	90.0512	89.403	22.1785	44.5514	4.21425	H1	intergenic	ENSG00000228657	RP11-170J3.2	3.47335	4.21557	3.72866	2.84649
679	chr11	76411750	76411949	170.097	169.178	101.554	125.554	3.01497	H1	intron	ENSG00000204529	RP11-672A2.2	0	0.38083	0	0.163761
680	chr16	84150700	84150899	166.094	163.676	87.5468	114.214	3.48228	H1	intergenic	ENSG00000140943	MBTPS1	35.9143	33.3365	32.0338	39.9571
681	chr12	124997500	124997699	254.144	251.704	148.246	183.876	3.70269	H1	intron	ENSG00000196498	NCOR2	56.5258	60.4064	65.1262	39.9603
682	chr1	161102100	161102299	106.06	103.157	43.1898	65.612	3.54108	H1	intron	ENSG00000143256	PFDN2	166.134	165.181	163.317	137.361
683	chr1	224692100	224692299	74.0421	70.147	29.1823	44.5514	3.06383	H1	intergenic	NA	NA	NA	NA	NA	NA
684	chr19	22018750	22018949	222.126	215.943	138.908	166.055	3.11165	H1	intron	ENSG00000198521	ZNF43	1.04929	1.44384	1.19579	1.32482
685	chr1	154934250	154934449	62.0353	60.9774	19.8439	32.671	3.3316	H1	promoter	ENSG00000163346	PBXIP1	43.029	39.906	39.3832	48.6897
686	chr11	9595400	9595599	90.0512	89.403	31.5169	49.4115	3.7277	H1	promoter	ENSG00000166483	WEE1	24.3712	19.7186	19.0435	21.9664
687	chr2	43405750	43405949	378.215	375.493	211.28	263.258	4.49962	H1	intergenic	ENSG00000234936	AC010883.5	0	0.347502	1.32292	0.585556
688	chr20	328200	328399	70.0398	70.147	29.1823	41.3113	3.02687	H1	promoter	ENSG00000225377	RP5-1103G7.4	4.31655	2.64632	2.48681	2.61814
689	chr6	26157300	26157499	162.092	163.676	66.5356	93.1529	4.31583	H1	promoter	ENSG00000197697	HIST1H2BE	0.114419	0.116751	0.202398	0
690	chr11	118661400	118661599	302.172	290.216	131.904	172.535	5.0068	H1	intron	ENSG00000110367	DDX6	53.0437	44.4911	61.362	56.7982
691	chr1	231524300	231524499	162.092	158.175	82.8777	102.873	3.63999	H1	intron	ENSG00000116903	EXOC8	4.02221	6.38403	4.56166	5.76284
692	chr8	55294250	55294449	274.156	268.209	178.596	203.316	3.28556	H1	intergenic	ENSG00000244107	AC027250.2	0.605832	0.576604	0	0
693	chr3	194872100	194872299	278.158	268.209	124.9	166.055	4.77595	H1	intron	ENSG00000206600	U6	1.21357	0.346519	0	0
694	chr7	27146550	27146749	150.085	144.42	54.8627	83.4326	4.32915	H1	promoter	ENSG00000253552	AC004080.12	3.18794	3.02289	2.92811	4.00974
695	chr19	4391000	4391199	127.406	124.247	68.8702	85.5927	3.04063	H1	intron	ENSG00000141985	SH3GL1	36.3487	37.4899	39.913	33.0988
696	chr3	45731100	45731299	134.076	130.666	68.8702	86.6727	3.31884	H1	promoter	ENSG00000230530	RP11-697K23.1	0	0	2.27937	0.53083
697	chr8	103423800	103423999	90.0512	86.6521	31.5169	47.7915	3.70824	H1	intron	ENSG00000104517	UBR5	31.1479	26.7721	38.9268	37.2516
698	chr8	21524500	21524699	110.063	108.659	50.1935	91.5329	3.11215	H1	intergenic	NA	NA	NA	NA	NA	NA
699	chr13	114200650	114200849	102.058	100.406	33.8514	83.4326	3.6662	H1	intron	ENSG00000198176	TFDP1	74.2812	68.2503	63.9458	56.8915
700	chr12	109082450	109082649	46.0262	45.3892	10.5056	33.211	3.02814	H1	intron	ENSG00000110880	CORO1C	304.542	297.256	281.986	172.559
701	chr3	183967600	183967799	74.0421	75.6487	12.8402	54.2717	3.9792	H1	promoter	NA	NA	NA	NA	NA	NA
702	chr17	80493750	80493949	110.063	111.41	50.1935	91.5329	3.16618	H1	intron	ENSG00000141568	FOXK2	25.0536	21.9923	23.3532	22.4009
703	chr6	42714550	42714749	106.06	100.406	47.8589	94.773	3.02768	H1	intergenic	ENSG00000124659	TBCC	12.1674	9.60911	13.6676	12.4779
704	chr1	159824350	159824549	62.0353	59.1435	19.8439	52.6516	2.96586	H1	intron	ENSG00000158714	SLAMF8	0.109097	0	0	0
705	chr11	2399300	2399499	130.074	125.164	57.1973	112.594	3.4029	H1	promoter	ENSG00000236264	RPL26P30	38.9349	37.8704	51.8491	31.7738
706	chr3	8544300	8544499	62.0353	59.1435	15.1748	51.0316	3.31899	H1	promoter	NA	NA	NA	NA	NA	NA
707	chr19	41829700	41829899	218.124	207.69	113.227	187.116	3.62513	H1	exon	ENSG00000142046	TMEM91	11.7376	10.2667	12.3908	11.0166
708	chr7	132695050	132695249	58.033	50.8909	12.8402	46.1714	3.25665	H1	intron	ENSG00000106554	CHCHD3	203.928	172.997	169.427	116.891
709	chr22	19515400	19515599	94.0535	89.403	40.8552	72.0922	2.96979	H1	intergenic	ENSG00000184113	CLDN5	79.3507	75.6304	38.2929	35.4509
710	chr17	43510700	43510899	142.081	133.417	61.8664	109.353	3.53496	H1	intergenic	ENSG00000159314	ARHGAP27	16.0705	13.9722	14.8678	15.9447
711	chr8	28559300	28559499	102.058	92.1538	33.8514	73.7123	3.58734	H1	promoter	ENSG00000246339	CTD-2172A10.1	0.890606	0.980513	0.301044	0.589283
712	chr8	17520000	17520199	306.174	287.465	194.938	260.018	3.17461	H1	intron	ENSG00000104213	PDGFRL	11.0405	7.68011	9.20065	7.15258
713	chr10	119216500	119216699	210.119	185.683	94.5506	153.095	3.95802	H1	intergenic	ENSG00000170370	EMX2	0.0147862	0.0153802	0.0260092	0.0467581
714	chr1	67218100	67218299	110.063	97.6556	47.8589	78.5724	3.13431	H1	promoter	ENSG00000152760	TCTEX1D1	5.09638	4.12434	3.57153	5.29371
715	chr22	35827250	35827449	78.0444	67.3961	24.5131	51.0316	3.29759	H1	intergenic	ENSG00000100297	MCM5	52.9645	50.6067	43.8326	36.0293
716	chr3	42094800	42094999	34.0193	28.884	3.50187	18.6306	3.09036	H1	intergenic	ENSG00000182606	TRAK1	37.9612	49.8146	49.4192	48.4824
717	chr17	7759800	7759999	62.8357	54.7421	18.4432	39.6912	3.11515	H1	promoter	ENSG00000182224	CYB5D1	4.94249	4.93164	3.77453	3.98898
718	chr2	75185700	75185899	58.033	48.1401	8.17104	31.591	3.7034	H1	promoter	ENSG00000115350	POLE4	34.8293	31.35	37.49	18.9988
719	chr2	46500300	46500499	278.158	257.206	171.592	222.757	3.22056	H1	intergenic	ENSG00000116016	EPAS1	230.042	253.621	226.896	235.164
720	chr2	191399300	191399499	94.0535	86.6521	31.5169	62.3719	3.53528	H1	exon	ENSG00000189362	TMEM194B	1.75819	2.15945	1.95755	1.6306
721	chr1	35658250	35658449	66.0375	59.1435	17.5094	42.9313	3.32459	H1	exon	ENSG00000116560	SFPQ	236.888	275.323	234.763	197.809
722	chr2	85726650	85726849	62.0353	56.3927	19.8439	42.9313	2.95897	H1	intergenic	ENSG00000168906	MAT2A	147.987	133.406	152.223	124.576
723	chr3	129106750	129106949	134.076	108.659	52.5281	104.493	3.54928	H1	intron	ENSG00000244932	RP11-529F4.1	1.95346	1.7226	2.70893	0.958509
724	chr17	76356500	76356699	74.0421	56.3927	19.8439	52.6516	3.33249	H1	intergenic	ENSG00000184557	SOCS3	4.41762	5.8165	3.43355	6.97047
725	chr21	38936000	38936199	142.081	116.912	71.2048	110.973	2.96446	H1	intergenic	NA	NA	NA	NA	NA	NA
726	chr4	77944050	77944249	102.058	78.3995	33.8514	72.0922	3.48143	H1	intron	ENSG00000234036	RP11-123J14.2	123.268	118.321	130.868	132.016
727	chr22	29784650	29784849	94.0535	78.3995	38.5206	68.8521	2.96735	H1	intergenic	ENSG00000100280	AP1B1	28.4281	29.8713	27.6493	28.7697
728	chr8	143757300	143757499	154.088	127.915	66.5356	117.454	3.53119	H1	intron	ENSG00000234616	JRK	6.02761	4.17101	7.01703	5.84744
729	chr3	48967750	48967949	110.063	89.403	43.1898	81.8125	3.26876	H1	intron	ENSG00000177479	ARIH2	71.0295	51.0648	60.7388	43.7786
730	chr2	39664900	39665099	174.099	152.673	80.5431	130.414	3.58102	H1	promoter	NA	NA	NA	NA	NA	NA
731	chr8	42751700	42751899	98.0557	78.3995	31.5169	62.3719	3.54919	H1	promoter	ENSG00000168172	HOOK3	24.3077	24.454	21.6204	31.0207
732	chr12	124937800	124937999	186.106	160.925	92.216	136.894	3.471	H1	intron	NA	NA	NA	NA	NA	NA
733	chr11	124790900	124791099	90.0512	70.147	36.186	59.1318	2.98164	H1	exon	ENSG00000221932	HEPN1	0.0464477	4.98e-05	0.104561	0.182149
734	chr15	57687200	57687399	94.0535	72.8978	33.8514	59.1318	3.29325	H1	intron	ENSG00000128849	CGNL1	18.8222	17.4493	9.71953	9.37089
735	chr1	205902000	205902199	110.063	86.6521	40.8552	70.4722	3.45603	H1	intron	ENSG00000174502	SLC26A9	0.0385964	0.0939159	0.0169681	0.107339
736	chr17	15870750	15870949	46.0262	34.3858	8.17104	26.7308	3.13124	H1	intron	ENSG00000011295	TTC19	22.2824	23.5204	21.8917	20.9458
737	chr2	64280300	64280499	94.0535	67.3961	15.1748	52.6516	4.23983	H1	intergenic	ENSG00000143952	VPS54	4.44827	4.41036	4.91568	4.52765
738	chr7	149411550	149411749	34.0193	23.3823	3.50187	18.6306	3.0144	H1	promoter	ENSG00000133619	KRBA1	3.21405	2.54688	2.50317	2.26202
739	chr3	187455350	187455549	59.3671	63.7283	27.6259	29.4309	3.0271	H1	intron	ENSG00000113916	BCL6	4.08249	23.3377	8.72072	7.50858
740	chr1	85039700	85039899	438.249	469.022	267.31	277.839	4.93455	H1	intron	ENSG00000117151	CTBS	7.94985	9.5283	8.29676	9.65126
741	chr11	124492850	124493049	234.133	248.953	138.908	144.995	4.12644	H1	promoter	ENSG00000064199	SPA17	22.1235	21.0282	21.1278	17.6954
742	chr2	45396800	45396999	34.0193	38.0536	9.72743	11.0703	3.25797	H1	intergenic	ENSG00000231054	AC009236.2	0.000434787	0	0.000162451	0
743	chr17	46703050	46703249	74.0421	83.9013	31.5169	33.211	3.73412	H1	intron	ENSG00000248304	AC103702.1	0.0558905	0	0	0
744	chr1	26560700	26560899	98.0557	108.659	52.5281	54.2717	3.4409	H1	promoter	ENSG00000130695	CEP85	8.5621	5.55226	7.00849	7.09514
745	chr22	37584050	37584249	128.74	139.835	76.6521	79.6525	3.33573	H1	intron	ENSG00000100385	IL2RB	0	0.0298565	0.0672331	0
746	chr1	222885900	222886099	442.251	474.524	292.99	300.519	4.55759	H1	promoter	ENSG00000186063	AIDA	26.3795	26.1348	25.3526	28.9298
747	chr12	45662050	45662249	110.063	119.662	64.201	65.612	3.23717	H1	intron	ENSG00000177119	ANO6	37.1607	44.6802	49.5361	56.5229
748	chr14	50359950	50360149	214.122	229.697	136.573	140.134	3.7176	H1	promoter	ENSG00000165527	ARF6	51.2499	54.3171	47.0454	51.1566
749	chr21	33897600	33897799	170.097	185.683	94.5506	98.0131	4.04473	H1	intergenic	ENSG00000186842	C21orf77	0.023349	0	0	0
750	chr11	118308100	118308299	66.0375	72.8978	31.5169	34.8311	3.1283	H1	promoter	ENSG00000095139	ARCN1	128.926	130.876	147.136	160.373
751	chr22	38147850	38148049	50.0284	56.3927	17.5094	20.2506	3.47523	H1	intron	ENSG00000189060	H1F0	70.1971	79.0422	57.6871	63.0018
752	chr17	63656700	63656899	42.0239	48.1401	15.1748	17.0105	3.22966	H1	intron	ENSG00000168646	AXIN2	0.825404	0.966787	0.534168	0.589256
753	chr5	90575650	90575849	90.0512	100.406	45.5244	49.4115	3.45192	H1	intergenic	ENSG00000234292	RP11-213H15.1	0.642437	0.354461	0.150912	0.303716
754	chr14	95624150	95624349	238.135	262.707	138.908	146.615	4.33736	H1	promoter	ENSG00000100697	DICER1	31.1833	23.7894	22.0191	23.6956
755	chrX	152110400	152110599	70.0398	81.1504	31.5169	34.8311	3.51624	H1	promoter	ENSG00000147394	ZNF185	17.9843	18.1565	12.7135	10.2574
756	chr13	51640150	51640349	34.0193	42.6383	8.17104	10.5303	3.62054	H1	exon	ENSG00000233672	RNASEH2B-AS1	0.166146	0	0.595493	0.147929
757	chr4	8201500	8201699	282.16	317.724	169.257	172.535	4.61366	H1	promoter	ENSG00000125089	SH3TC1	75.0353	64.7525	55.0615	59.7273
758	chr10	88728550	88728749	38.0216	45.3892	12.8402	13.7704	3.33754	H1	promoter	ENSG00000148671	C10orf116	107.667	112.899	133.405	64.0885
759	chr1	226250750	226250949	190.108	207.69	131.904	135.274	3.14955	H1	promoter	NA	NA	NA	NA	NA	NA
760	chr17	73008850	73009049	170.097	193.936	94.5506	99.6331	4.1648	H1	promoter	ENSG00000167862	ICT1	27.1748	22.7525	24.0918	16.9774
761	chr10	115439700	115439899	226.129	259.956	127.235	132.034	4.58804	H1	promoter	ENSG00000165806	CASP7	47.762	53.4816	56.9908	43.9573
762	chr9	140200850	140201049	290.165	325.977	178.596	183.876	4.51166	H1	promoter	ENSG00000238994	snoU13	0	0	0	21.6137
763	chr6	26020750	26020949	96.7216	106.825	55.6409	56.4318	3.17857	H1	promoter	ENSG00000112343	TRIM38	19.0347	14.3872	15.0167	19.4635
764	chr9	130530950	130531149	278.158	303.97	169.257	169.295	4.45698	H1	intron	ENSG00000095370	SH2D3C	45.9297	37.488	37.0356	38.268
765	chr1	16161850	16162049	334.19	356.237	241.629	242.198	3.63141	H1	exon	ENSG00000065526	SPEN	16.6878	19.5035	16.6291	12.8319
766	chr2	207160200	207160399	34.0193	39.8875	10.5056	10.5303	3.32997	H1	intron	ENSG00000204186	ZDBF2	1.43794	1.56866	1.80278	1.90127
767	chr9	95526950	95527149	46.0262	53.6418	15.1748	15.3905	3.64608	H1	exon	ENSG00000185963	BICD2	11.7738	11.659	11.1521	13.0132
768	chr1	23076000	23076199	106.06	125.164	36.186	38.0712	4.79126	H1	intron	ENSG00000133216	EPHB2	24.9469	20.7958	19.0432	11.9832
769	chr13	52158700	52158899	118.067	130.666	71.2048	73.7123	3.23355	H1	promoter	ENSG00000139668	WDFY2	2.54531	4.64117	2.96501	2.63427
770	chr22	39713250	39713449	118.067	130.666	66.5356	68.8521	3.51517	H1	intron	ENSG00000100316	RPL3	847.326	767.349	885.59	721.49
771	chr1	23670200	23670399	86.0489	97.6556	40.8552	42.9313	3.67667	H1	intron	ENSG00000125944	HNRNPR	108.393	94.0179	101.975	77.864
772	chr5	133707550	133707749	218.124	243.451	120.231	123.934	4.52005	H1	promoter	ENSG00000119048	UBE2B	89.0584	94.3089	103.957	131.362
773	chr7	559650	559849	66.0375	86.6521	17.5094	25.1108	4.48058	H1	promoter	ENSG00000197461	PDGFA	22.0972	23.7373	39.9882	39.7383
774	chr9	139050050	139050249	54.0307	67.3961	22.1785	26.7308	3.46874	H1	intergenic	ENSG00000238227	C9orf69	7.37179	4.62859	3.43967	4.75613
775	chr19	17970750	17970949	110.063	130.666	59.5318	67.2321	3.66201	H1	promoter	ENSG00000105640	RPL18A	127.967	131.158	140.663	126.579
776	chr15	83760650	83760849	26.0148	34.3858	5.83646	8.91028	3.3148	H1	intergenic	ENSG00000136404	TM6SF1	10.7434	10.1802	12.9486	13.9683
777	chr6	13487350	13487549	78.0444	97.6556	31.5169	36.4511	4.08711	H1	exon	ENSG00000145990	GFOD1	8.27663	10.5708	8.12779	10.4742
778	chr5	156816800	156816999	30.0171	39.8875	5.83646	8.91028	3.68052	H1	intron	NA	NA	NA	NA	NA	NA
779	chr7	150784150	150784349	146.083	169.178	89.8814	96.393	3.56353	H1	promoter	ENSG00000133612	AGAP3	38.0358	31.7815	30.388	37.3984
780	chr10	74114500	74114699	96.4548	111.41	55.7965	60.7519	3.18238	H1	intron	ENSG00000148719	DNAJB12	15.017	14.1603	16.1405	13.8753
781	chr7	27198200	27198399	72.708	86.6521	34.6296	39.1512	3.47063	H1	intergenic	ENSG00000105997	HOXA3	5.772	4.21094	3.24845	6.38329
782	chr7	32932200	32932399	99.6566	113.06	60.4657	65.288	2.97223	H1	intergenic	NA	NA	NA	NA	NA	NA
783	chr5	139944000	139944199	98.0557	114.161	52.5281	57.5118	3.5093	H1	exon	ENSG00000176087	SLC35A4	24.3071	25.3089	25.7284	22.6032
784	chr13	80914450	80914649	71.3739	82.9843	38.5206	42.3913	3.01207	H1	intron	ENSG00000136158	SPRY2	12.0717	31.1714	9.41508	9.08737
785	chr7	143077850	143078049	79.3784	93.9878	39.2988	45.0914	3.44318	H1	promoter	ENSG00000232533	AC093673.5	13.0907	17.0742	12.5924	9.82512
786	chr9	82187700	82187899	66.0375	78.3995	31.5169	36.4511	3.28285	H1	promoter	ENSG00000106829	TLE4	20.1054	18.9475	16.1549	16.3373
787	chr4	156588950	156589149	26.0148	34.3858	3.50187	7.29023	3.62214	H1	promoter	ENSG00000164116	GUCY1A3	1.22138	1.08629	2.66673	0.76023
788	chr14	77416800	77416999	270.154	298.468	194.938	206.556	3.3563	H1	intergenic	ENSG00000243225	RP11-7F17.1	0.160519	0.428664	1.18976	1.85889
789	chr5	180236900	180237099	234.133	257.206	134.238	146.615	4.30135	H1	intron	ENSG00000131446	MGAT1	86.2632	84.3822	94.713	96.748
790	chr8	10634100	10634299	152.753	168.261	82.8777	90.9928	3.90652	H1	intron	ENSG00000248896	CTD-2135J3.3	2.07727	0.95136	1.22114	0.51025
791	chr17	40831150	40831349	94.0535	105.908	36.186	44.5514	4.11934	H1	promoter	ENSG00000068137	PLEKHH3	1.86218	1.52338	1.81992	2.4354
792	chr15	25683950	25684149	154.088	169.178	78.2085	88.2927	4.10216	H1	exon	ENSG00000114062	UBE3A	10.1978	11.6206	10.2936	12.7719
793	chr16	1583850	1584049	146.083	158.175	87.5468	94.773	3.38651	H1	intron	ENSG00000100726	TELO2	6.6418	6.31264	6.4559	5.08123
794	chr12	6433200	6433399	126.072	141.669	66.5356	73.7123	3.78261	H1	intron	ENSG00000251534	RP1-96H9.6	0.692293	1.17438	0.691383	0.73386
795	chrX	39872100	39872299	158.09	180.181	73.5393	83.4326	4.51804	H1	intergenic	ENSG00000223486	AC092198.1	0.0297952	0.0154957	0	0.0529985
796	chr5	150460400	150460599	142.081	155.424	89.8814	96.393	3.14215	H1	intron	ENSG00000145901	TNIP1	42.9372	43.4405	45.8443	43.0329
797	chr19	9251100	9251299	91.3853	101.323	50.9717	55.8917	3.08297	H1	promoter	ENSG00000130803	ZNF317	8.92786	10.0844	8.8977	8.45769
798	chr19	49242400	49242599	86.0489	97.6556	43.1898	49.4115	3.38284	H1	exon	ENSG00000105538	RASIP1	20.4779	24.1712	19.3054	18.6779
799	chr1	156647050	156647249	66.0375	75.6487	29.1823	34.8311	3.34757	H1	exon	ENSG00000132688	NES	150.557	137.174	125.782	128.896
800	chr16	66583850	66584049	114.065	127.915	57.1973	65.612	3.75028	H1	exon	ENSG00000166548	TK2	7.74138	8.36525	7.9427	8.75796
801	chr3	49843200	49843399	498.283	526.79	370.031	389.622	3.766	H1	promoter	ENSG00000185614	C3orf54	13.7566	13.16	14.2836	13.3786
802	chr7	42276800	42276999	90.0512	100.406	45.5244	52.6516	3.35046	H1	intergenic	ENSG00000106571	GLI3	6.17136	6.69042	2.72718	3.88215
803	chr7	132104100	132104299	106.06	116.912	59.5318	67.2321	3.19525	H1	intron	NA	NA	NA	NA	NA	NA
804	chr1	24126950	24127149	94.0535	111.41	38.5206	46.1714	4.1361	H1	exon	ENSG00000117308	GALE	49.6688	41.0393	45.9586	35.8003
805	chr5	14144100	14144299	122.069	144.42	50.1935	59.1318	4.51957	H1	promoter	ENSG00000038382	TRIO	83.3057	96.754	99.8401	82.9061
806	chr4	89204850	89205049	110.063	127.915	47.8589	55.8917	4.1955	H1	intron	ENSG00000163644	PPM1K	2.89763	2.58807	3.81219	3.16172
807	chr19	13885600	13885799	48.6943	57.3096	19.0658	23.4907	3.24083	H1	promoter	ENSG00000104979	C19orf53	121.86	114.745	113.331	102.219
808	chr4	114900700	114900899	79.3784	91.2369	37.7424	45.0914	3.41227	H1	exon	ENSG00000180801	ARSJ	29.4464	24.6218	24.576	17.2704
809	chr17	38266900	38267099	98.0557	109.576	54.8627	62.912	3.11697	H1	intergenic	ENSG00000126368	NR1D1	3.2936	3.171	1.27542	2.68588
810	chr22	36877400	36877599	222.126	243.451	143.577	157.955	3.61689	H1	intron	ENSG00000100348	TXN2	80.7832	81.7307	67.9935	60.0853
811	chr12	10306300	10306499	70.0398	81.1504	31.5169	39.6912	3.34461	H1	intergenic	ENSG00000172243	CLEC7A	0	0	0.0929374	0.0586888
812	chr5	141256450	141256649	110.063	127.915	52.5281	63.992	3.87948	H1	intron	ENSG00000156453	PCDH1	40.206	46.2521	49.9592	47.5156
813	chr10	104952250	104952449	66.0375	76.5656	29.9605	36.9912	3.26507	H1	intron	ENSG00000076685	NT5C2	73.7115	80.5503	96.0206	63.7421
814	chr7	33761500	33761699	42.0239	50.8909	15.1748	20.2506	3.19003	H1	intergenic	ENSG00000173862	RP11-89N17.1	0.887277	1.31144	0.446612	0.524369
815	chr11	35160950	35161149	130.074	155.424	57.1973	72.0922	4.39222	H1	promoter	ENSG00000026508	CD44	137.918	108.612	108.063	68.63
816	chr18	9017050	9017249	162.092	180.181	108.558	117.454	3.07127	H1	intergenic	ENSG00000242058	RP11-143J12.1	0	0.0223086	0.417738	0.204228
817	chr6	30705000	30705199	166.094	191.185	85.2122	98.0131	4.29731	H1	intron	ENSG00000137312	FLOT1	84.2509	79.1632	67.2982	73.4663
818	chr16	84100850	84101049	18.0102	23.3823	1.16729	4.05013	3.30604	H1	intron	ENSG00000140943	MBTPS1	35.9143	33.3365	32.0338	39.9571
819	chr12	95900550	95900749	18.0102	23.3823	1.16729	4.05013	3.30604	H1	intron	ENSG00000111142	METAP2	312.568	299.472	281.036	199.097
820	chr1	204074050	204074249	194.11	199.437	89.8814	119.074	4.30932	H1	intron	ENSG00000230550	RP11-74C13.3	0	0	0.0705478	0
821	chr2	219432850	219433049	114.065	116.912	57.1973	73.7123	3.28403	H1	intron	ENSG00000135913	USP37	8.69333	4.81683	8.03074	6.28873
822	chr10	44504100	44504299	218.124	226.946	113.227	141.754	4.17427	H1	intergenic	ENSG00000223992	RP11-168P8.4	0	0.129043	0	0
823	chr3	43328450	43328649	178.101	182.932	101.554	122.314	3.49057	H1	promoter	ENSG00000011198	ABHD5	34.8713	25.534	22.3234	22.0998
824	chr19	16547400	16547599	70.0398	72.8978	30.7387	41.3113	3.02913	H1	intron	NA	NA	NA	NA	NA	NA
825	chr5	78280600	78280799	42.0239	42.6383	10.5056	17.0105	3.31579	H1	intron	ENSG00000113273	ARSB	13.6775	12.199	13.1416	15.4567
826	chr18	19750150	19750349	86.0489	86.6521	33.8514	46.1714	3.55216	H1	promoter	ENSG00000141448	GATA6	2.51463	3.26962	2.05514	1.57843
827	chr11	69069900	69070099	58.033	59.1435	19.8439	28.3509	3.30571	H1	intergenic	ENSG00000172927	MYEOV	39.8192	40.4229	31.7562	17.9085
828	chr20	30428150	30428349	50.0284	50.8909	17.5094	25.1108	3.02939	H1	intergenic	ENSG00000179772	FOXS1	0.0653873	0.0338888	0	0
829	chr21	46848050	46848249	54.0307	53.6418	19.8439	28.3509	2.97738	H1	intron	ENSG00000182871	COL18A1	49.781	54.8789	55.454	60.3191
830	chr5	78908150	78908349	54.0307	53.6418	12.8402	21.8707	3.68315	H1	promoter	ENSG00000164329	PAPD4	35.8004	35.1977	35.7818	35.8789
831	chr16	4323350	4323549	94.0535	92.1538	36.186	49.4115	3.68387	H1	intergenic	ENSG00000090447	TFAP4	4.19352	3.47084	3.42084	3.72778
832	chr1	32054200	32054399	238.135	248.953	143.577	164.435	3.79775	H1	intergenic	ENSG00000142910	TINAGL1	154.162	157.336	148.855	121.783
833	chr3	11243850	11244049	178.101	188.434	89.8814	110.973	4.06821	H1	intron	ENSG00000213964	AC083855.4	2.1358	2.01262	2.53637	5.34121
834	chr19	55997800	55997999	110.063	119.662	33.8514	52.6516	4.49579	H1	exon	ENSG00000090971	NAT14	12.6421	11.5722	12.2575	11.2487
835	chr19	12845000	12845199	94.0535	103.157	40.8552	55.8917	3.60237	H1	intron	ENSG00000123144	C19orf43	166.677	163.044	153.689	135.111
836	chr11	36138400	36138599	134.076	144.42	75.8739	91.5329	3.28569	H1	intron	NA	NA	NA	NA	NA	NA
837	chr2	128283800	128283999	234.133	254.455	122.566	149.855	4.42505	H1	exon	ENSG00000163166	IWS1	25.6388	21.3193	24.881	21.3669
838	chr14	105559400	105559599	54.0307	59.1435	22.1785	29.9709	2.97431	H1	intergenic	ENSG00000183484	GPR132	0.0107691	0	0.0253207	0
839	chr1	3506800	3506999	98.0557	105.908	45.5244	59.1318	3.48348	H1	intron	ENSG00000162591	MEGF6	7.17468	6.47051	5.62242	5.13168
840	chr7	1084200	1084399	38.0216	42.6383	5.83646	13.7704	3.69512	H1	intron	ENSG00000164849	GPR146	14.8843	10.9967	4.35678	13.651
841	chr11	72525200	72525399	84.7148	91.2369	43.1898	51.5716	3.06943	H1	promoter	ENSG00000168010	ATG16L2	14.549	12.6793	15.4754	11.6533
842	chr20	47804750	47804949	38.0216	42.6383	10.5056	15.3905	3.27269	H1	exon	ENSG00000124214	STAU1	56.8069	56.9479	55.4522	59.483
843	chr7	135194550	135194749	262.149	279.212	169.257	187.116	3.71802	H1	intron	ENSG00000080802	CNOT4	10.7562	9.03611	12.3811	15.7598
844	chr1	1197050	1197249	30.0171	34.3858	5.83646	10.5303	3.30191	H1	intron	ENSG00000160087	UBE2J2	46.4778	43.1293	60.8203	42.9347
845	chr22	37723850	37724049	30.0171	34.3858	5.83646	10.5303	3.30191	H1	intergenic	ENSG00000100055	CYTH4	0.367638	0.0830883	0.142848	0
846	chr7	143080450	143080649	66.0375	70.147	19.8439	28.3509	3.83992	H1	intron	ENSG00000159840	ZYX	162.101	192.415	190.802	132.653
847	chr11	124630000	124630199	163.693	170.278	98.2859	110.001	3.31213	H1	intron	ENSG00000019102	VSIG2	1.66836	1.74353	1.94452	2.13792
848	chr9	139540000	139540199	158.09	169.178	73.5393	89.9128	4.22958	H1	intergenic	ENSG00000172889	EGFL7	284.529	275.884	278.985	211.51
849	chr11	62538800	62538999	126.072	133.417	71.2048	81.8125	3.23717	H1	promoter	ENSG00000162227	TAF6L	14.8205	13.3192	10.3973	12.615
850	chr19	45906800	45906999	138.078	147.171	64.201	78.5724	4.02318	H1	intron	ENSG00000117877	CD3EAP	5.18858	4.23873	3.96932	2.87357
851	chr4	134073100	134073299	42.0239	45.3892	12.8402	18.6306	3.17414	H1	exon	ENSG00000138650	PCDH10	58.3904	62.0135	60.7294	43.2415
852	chr14	21539600	21539799	42.0239	45.3892	12.8402	18.6306	3.17414	H1	intron	ENSG00000165795	NDRG2	0.121013	0	0	0.088979
853	chr12	48499550	48499749	86.0489	92.1538	43.1898	47.7915	3.25781	H1	intron	ENSG00000079387	SENP1	9.20286	6.4364	9.15128	6.81171
854	chr14	76337200	76337399	34.0193	37.1366	8.17104	10.5303	3.36741	H1	intron	NA	NA	NA	NA	NA	NA
855	chr11	76289000	76289199	198.113	204.939	124.9	132.034	3.44383	H1	intergenic	ENSG00000254755	RP11-672A2.7	8.43	5.94559	11.3311	12.5237
856	chrX	117861800	117861999	62.0353	67.3961	12.8402	18.6306	4.33186	H1	promoter	ENSG00000131724	IL13RA1	27.2668	26.9282	24.8235	36.3964
857	chr1	1343400	1343599	78.0444	83.9013	26.8477	33.211	3.98288	H1	intergenic	ENSG00000242485	MRPL20	300.341	284.656	290.283	236.04
858	chr3	108308250	108308449	190.108	199.437	99.2197	112.594	4.15416	H1	promoter	ENSG00000198919	DZIP3	5.26184	2.79499	2.36536	2.27494
859	chr17	1415050	1415249	86.0489	92.1538	31.5169	39.6912	3.96145	H1	intron	ENSG00000132376	INPP5K	21.9864	21.174	25.2055	20.1759
860	chr10	3825600	3825799	192.776	201.271	123.344	134.194	3.28205	H1	intron	ENSG00000067082	KLF6	176	174.585	162.933	110.288
861	chr4	30721200	30721399	46.0262	50.8909	8.17104	13.7704	4.0066	H1	promoter	ENSG00000169851	PCDH7	5.44704	5.40486	3.13426	1.35006
862	chr7	26241450	26241649	270.154	290.216	150.581	167.675	4.50881	H1	promoter	ENSG00000122566	HNRNPA2B1	1184.98	1073.79	1089.04	818.679
863	chr4	30719650	30719849	62.0353	67.3961	24.5131	29.9709	3.3775	H1	intergenic	ENSG00000169851	PCDH7	5.44704	5.40486	3.13426	1.35006
864	chr11	68205500	68205699	106.06	114.161	47.8589	55.8917	3.83037	H1	intron	ENSG00000241760	AP000807.3	6100.94	10812.2	19215.8	10811.9
865	chr1	12238800	12238999	298.169	320.475	141.242	162.815	5.18776	H1	intron	ENSG00000028137	TNFRSF1B	13.2047	16.916	11.867	7.66112
866	chr19	59070050	59070249	218.124	226.946	103.889	119.074	4.63942	H1	exon	ENSG00000130725	UBE2M	33.5438	38.0564	30.2318	31.7338
867	chr5	10353600	10353799	30.0171	31.6349	7.39284	10.5303	3.0205	H1	promoter	ENSG00000145495	2013-03-06	65.3827	64.531	79.264	50.6146
868	chr9	127623850	127624049	154.088	160.925	61.8664	78.5724	4.5098	H1	intron	ENSG00000136942	RPL35	1877.83	1712.04	1516.88	1397.11
869	chr22	46408900	46409099	54.0307	56.3927	17.5094	23.4907	3.43184	H1	intergenic	ENSG00000231711	RP11-398F12.1	2.09204	1.71821	2.17676	2.28175
870	chr16	58718050	58718249	102.058	105.908	52.5281	60.7519	3.24396	H1	exon	ENSG00000103042	SLC38A7	13.5283	12.9106	15.5629	12.8323
871	chr1	202857900	202858099	114.065	116.912	57.1973	67.2321	3.4398	H1	intron	ENSG00000183155	RABIF	10.5186	9.00205	11.6639	10.9636
872	chr19	13273600	13273799	226.129	232.448	113.227	130.414	4.47557	H1	intergenic	ENSG00000213253	CTC-250I14.1	3.01102	2.51846	2.7476	2.03179
873	chr4	57886200	57886399	54.0307	56.3927	17.5094	25.1108	3.36303	H1	intron	ENSG00000047315	POLR2B	144.978	128.192	169.304	119.291
874	chr12	76477650	76477849	78.0444	81.1504	29.1823	39.6912	3.61756	H1	intron	ENSG00000187109	NAP1L1	389.193	380.212	370.745	407.094
875	chr14	89826350	89826549	22.0125	23.3823	1.16729	5.67018	3.2884	H1	intron	NA	NA	NA	NA	NA	NA
876	chr12	77158100	77158299	278.158	281.963	148.246	172.535	4.46816	H1	promoter	ENSG00000186908	ZDHHC17	41.819	45.7382	48.0246	37.2529
877	chr13	103425950	103426149	66.0375	67.3961	24.5131	31.591	3.41944	H1	intron	ENSG00000151287	C13orf27	33.3372	29.625	21.9729	18.9835
878	chr17	48716250	48716449	210.119	213.192	92.216	112.594	4.68858	H1	intron	ENSG00000108846	ABCC3	1.7165	1.12076	1.16129	1.18441
879	chr8	17354800	17354999	50.0284	50.8909	8.17104	15.3905	4.02748	H1	promoter	ENSG00000003989	SLC7A2	3.23422	4.35438	3.46756	2.39313
880	chr2	38829300	38829499	110.063	127.915	36.186	52.6516	4.57831	H1	intron	ENSG00000143889	HNRPLL	28.0142	26.1129	26.1419	30.3325
881	chr10	30025000	30025199	198.113	215.943	122.566	138.514	3.59921	H1	intergenic	ENSG00000197321	SVIL	42.0175	45.1684	45.5686	42.8327
882	chr15	75323750	75323949	42.0239	48.1401	15.1748	20.2506	3.05102	H1	intron	ENSG00000138621	PPCDC	3.26779	2.77758	2.12815	2.47183
883	chr16	24712750	24712949	54.0307	61.8944	22.1785	28.3509	3.1642	H1	intergenic	ENSG00000090905	TNRC6A	23.1526	18.8207	21.2012	22.4073
884	chr14	62162200	62162399	170.097	188.434	87.5468	109.353	4.05767	H1	promoter	ENSG00000023608	SNAPC1	9.73723	11.6735	8.26299	10.4278
885	chr10	3852150	3852349	222.126	240.7	129.569	153.095	3.93704	H1	intergenic	ENSG00000067082	KLF6	176	174.585	162.933	110.288
886	chr1	156716700	156716899	146.083	159.091	87.5468	102.333	3.24378	H1	intron	ENSG00000143294	PRCC	37.3721	37.937	35.211	33.5274
887	chr5	149974750	149974949	166.094	180.181	99.2197	115.834	3.43147	H1	intergenic	ENSG00000171992	SYNPO	51.7668	59.2121	57.072	49.4941
888	chr3	14474050	14474249	218.124	240.7	101.554	127.174	4.74408	H1	intron	ENSG00000131389	SLC6A6	23.2826	22.9922	22.4942	13.2016
889	chr12	56554450	56554649	242.138	262.707	145.911	167.675	3.96613	H1	intron	ENSG00000092841	MYL6	10802.3	9619.1	12064.5	10629.9
890	chr6	17706800	17706999	50.0284	56.3927	19.8439	26.7308	3.03323	H1	intergenic	ENSG00000124789	NUP153	13.8291	14.2083	15.7805	14.2648
891	chrX	149108400	149108599	150.085	169.178	71.2048	94.773	4.12141	H1	intron	ENSG00000183171	RP11-49C9.2	8.31818	5.4484	6.6656	6.43466
892	chr12	118489550	118489749	34.0193	39.8875	5.83646	13.7704	3.48597	H1	intron	ENSG00000176871	WSB2	39.6996	41.6815	40.6005	38.7383
893	chr17	20945400	20945599	82.0466	92.1538	38.5206	51.0316	3.27939	H1	intron	ENSG00000124422	USP22	104.858	108.891	113.544	98.2456
894	chr17	80231200	80231399	82.0466	92.1538	36.186	49.4115	3.43076	H1	exon	ENSG00000141551	CSNK1D	41.4269	42.107	42.4931	36.3709
895	chr8	37552800	37552999	30.0171	37.1366	3.50187	10.5303	3.6332	H1	promoter	ENSG00000183779	ZNF703	5.71122	4.97117	4.22636	3.42914
896	chr13	99739800	99739999	58.033	67.3961	19.8439	29.9709	3.53593	H1	intergenic	ENSG00000088387	DOCK9	152.877	177.48	179.006	274.602
897	chr6	143166950	143167149	198.113	229.697	92.216	117.454	4.73288	H1	intron	ENSG00000233138	RP1-67K17.3	0	0.038906	4.23807	0.326571
898	chr8	54792800	54792999	46.0262	56.3927	10.5056	20.2506	3.79363	H1	intron	ENSG00000147509	RGS20	5.67424	3.82825	5.74353	6.57021
899	chr16	16090100	16090299	96.7216	112.327	44.7462	58.5918	3.68401	H1	intron	ENSG00000103222	ABCC1	23.0736	24.3642	24.666	16.7433
900	chr8	10529900	10530099	54.0307	67.3961	8.17104	20.2506	4.37055	H1	promoter	ENSG00000183638	RP1L1	0.216671	0.225814	0.237015	0.300122
901	chr20	1308650	1308849	48.6943	57.3096	19.0658	26.7308	3.09488	H1	intron	ENSG00000203630	AL136531.1	0.0324194	0.302458	0.171246	0.0575428
902	chr7	644050	644249	266.151	295.718	176.261	203.316	3.68964	H1	intron	ENSG00000164818	HEATR2	14.7847	16.4392	13.7155	9.77247
903	chr8	103424100	103424299	90.0512	105.908	45.5244	59.1318	3.35217	H1	intron	ENSG00000104517	UBR5	31.1479	26.7721	38.9268	37.2516
904	chr15	40636400	40636599	198.113	218.693	124.9	146.615	3.47114	H1	intergenic	ENSG00000188549	C15orf52	19.4733	17.3394	18.4086	22.812
905	chr16	80965950	80966149	214.122	248.953	103.889	135.274	4.69406	H1	intergenic	ENSG00000166451	CENPN	31.5803	32.4917	29.0736	24.7011
906	chr2	201729000	201729199	214.122	243.451	117.896	144.995	4.24876	H1	intron	ENSG00000013441	CLK1	29.0239	46.33	42.0203	34.6503
907	chr7	100041400	100041599	154.088	174.68	87.5468	106.113	3.65854	H1	intergenic	ENSG00000160813	PPP1R35	21.6183	19.2241	19.2849	15.8571
908	chr3	194304300	194304499	162.092	180.181	92.216	119.074	3.53529	H1	promoter	ENSG00000229334	AC046143.3	4.25269	4.22523	2.74288	2.77227
909	chr11	119191850	119192049	78.0444	86.6521	37.7424	52.1116	3.01254	H1	intergenic	ENSG00000076706	MCAM	730.422	768.687	1006.32	1045.79
910	chr1	41342850	41343049	135.41	150.839	68.8702	92.6129	3.67616	H1	intergenic	ENSG00000229528	RP5-1066H13.4	0.12425	0	0	0
911	chr7	150066650	150066849	250.142	273.711	148.246	185.496	3.95962	H1	promoter	ENSG00000196456	ZNF775	5.97047	4.28237	4.53994	4.96621
912	chr1	204015300	204015499	70.0398	81.1504	33.8514	46.1714	3.01709	H1	intergenic	ENSG00000176754	LINC00303	0.0436343	0.0452274	0	0
913	chr22	50328350	50328549	102.058	119.662	31.5169	54.2717	4.44782	H1	intergenic	ENSG00000182858	ALG12	6.09337	8.64573	6.73708	7.20243
914	chr10	126745450	126745649	354.201	383.745	243.964	281.079	3.7171	H1	intron	NA	NA	NA	NA	NA	NA
915	chr2	128165450	128165649	54.0307	64.6452	12.8402	26.7308	3.85485	H1	intergenic	ENSG00000115718	PROC	0	0.67348	0	0
916	chr8	81158750	81158949	70.0398	75.6487	31.5169	44.5514	2.98022	H1	intergenic	ENSG00000076554	TPD52	13.0199	12.4871	6.36106	5.79629
917	chr9	139563800	139563999	202.115	215.943	106.223	138.514	4.0311	H1	intron	ENSG00000228401	RP11-251M1.1	15.2965	17.9375	16.4257	10.7499
918	chr10	114832850	114833049	126.072	138.918	50.1935	75.3323	4.16694	H1	intron	ENSG00000233547	RP11-57H14.2	0	1.50311	1.12215	1.54806
919	chr19	13972700	13972899	210.119	226.946	115.562	148.235	3.96009	H1	intergenic	ENSG00000187556	NANOS3	0.68055	0.701455	1.20026	0.554602
920	chr16	30065250	30065449	78.0444	86.6521	26.8477	44.5514	3.7424	H1	promoter	ENSG00000149925	ALDOA	334.183	326.284	376.157	315.027
921	chr20	2082700	2082899	214.122	229.697	122.566	154.715	3.80741	H1	promoter	ENSG00000125834	STK35	6.01463	7.34715	8.47925	8.27616
922	chrX	153237300	153237499	134.076	149.922	50.1935	76.9524	4.42725	H1	promoter	ENSG00000172534	HCFC1	22.814	28.0808	22.2249	24.9943
923	chr7	21467850	21468049	118.067	127.915	54.8627	73.7123	3.70845	H1	promoter	ENSG00000105866	SP4	4.42382	3.59229	1.55767	2.61173
924	chr15	78614400	78614599	250.142	262.707	159.919	188.736	3.48493	H1	intergenic	ENSG00000140395	WDR61	40.5515	33.1313	40.3669	36.7192
925	chr12	123432300	123432499	130.074	141.669	54.8627	78.5724	4.07753	H1	intron	ENSG00000111325	OGFOD2	11.6422	8.89595	10.8704	8.84459
926	chr11	46402700	46402899	66.0375	72.8978	22.1785	36.4511	3.55176	H1	promoter	ENSG00000110492	MDK	399.966	386.076	407.027	407.803
927	chr19	50380250	50380449	174.099	183.849	96.107	119.614	3.64462	H1	promoter	ENSG00000104946	TBC1D17	12.0469	11.1152	13.0545	13.8416
928	chr6	32937900	32938099	422.24	441.513	262.64	308.62	4.39419	H1	intron	ENSG00000204257	HLA-DMA	1.81777	2.19002	1.52836	2.03723
929	chr17	32563100	32563299	52.6966	57.3096	16.7312	27.2708	3.32225	H1	intergenic	ENSG00000108691	CCL2	433.351	822.364	327.942	280.75
930	chr2	148778700	148778899	234.133	243.451	150.581	179.016	3.29036	H1	promoter	ENSG00000204406	MBD5	16.3845	22.7604	18.3926	15.1348
931	chrX	153563750	153563949	34.0193	37.1366	3.50187	13.7704	3.56229	H1	intergenic	ENSG00000231830	XX-FW83128A1.2	0	0	0	0.378062
932	chr1	36614750	36614949	146.083	152.673	68.8702	94.773	3.82679	H1	intron	ENSG00000054116	TRAPPC3	171.592	178.914	189.59	143.98
933	chr2	113589550	113589749	35.3534	38.0536	7.39284	16.4705	3.17413	H1	intron	ENSG00000125538	IL1B	0	0.0933934	0.355716	0
934	chr4	185608900	185609099	54.0307	75.6487	17.5094	31.591	3.86673	H1	intron	ENSG00000164306	CCDC111	10.5104	9.15425	5.3745	8.27401
935	chr20	32307900	32308099	30.0171	45.3892	5.83646	15.3905	3.63059	H1	exon	ENSG00000101417	PXMP4	3.33322	3.9245	3.35449	3.11779
936	chr5	70751500	70751699	90.0512	116.912	47.8589	63.992	3.52497	H1	promoter	ENSG00000145734	BDP1	5.54698	5.6145	5.23594	6.69007
937	chr6	163757450	163757649	166.094	196.687	117.896	135.274	2.97115	H1	intergenic	ENSG00000185345	PARK2	0.422186	0.207731	0	0
938	chrX	153965950	153966149	94.0535	127.915	43.1898	62.3719	4.07668	H1	intron	ENSG00000160219	GAB3	5.8015	2.60578	2.0329	2.21282
939	chr1	201507750	201507949	142.081	185.683	87.5468	107.733	3.82052	H1	intergenic	ENSG00000159176	CSRP1	479.985	573.057	795.018	352.491
940	chr20	21284200	21284399	126.072	163.676	78.2085	96.393	3.58769	H1	promoter	ENSG00000088930	XRN2	30.7933	30.068	32.5375	29.2909
941	chr17	73043400	73043599	30.0171	48.1401	5.83646	15.3905	3.77462	H1	promoter	ENSG00000180901	KCTD2	7.88744	6.8092	8.69136	8.73534
942	chr20	44992950	44993149	66.0375	92.1538	31.5169	44.5514	3.58749	H1	intron	ENSG00000080189	SLC35C2	14.4351	17.5096	16.1061	17.0874
943	chr11	130786150	130786349	90.0512	114.161	54.8627	67.2321	3.06843	H1	exon	ENSG00000120451	SNX19	32.6003	24.4883	24.8885	28.7874
944	chr2	38977750	38977949	170.097	224.195	96.8852	122.314	4.36039	H1	intron	ENSG00000115875	SRSF7	160.864	152.138	145.489	126.986
945	chr12	21591200	21591399	102.058	136.168	57.1973	72.0922	3.73078	H1	promoter	ENSG00000121350	PYROXD1	4.25056	2.31283	3.27266	3.04199
946	chr18	21977400	21977599	110.063	149.922	66.5356	81.8125	3.71684	H1	intron	ENSG00000141447	OSBPL1A	5.969	5.61896	6.02562	5.35918
947	chr17	42172850	42173049	55.3648	78.3995	29.1823	38.6112	3.20892	H1	intron	ENSG00000141349	G6PC3	34.9258	31.7039	37.8063	28.104
948	chr19	39343100	39343299	162.092	199.437	120.231	135.274	2.96791	H1	intergenic	ENSG00000104824	HNRNPL	343.077	375.129	312.711	318.377
949	chr7	79083200	79083399	66.0375	89.403	38.5206	47.7915	3.05859	H1	promoter	ENSG00000187391	MAGI2	0.241557	0.360661	0.629139	0.280838
950	chr7	23339200	23339399	122.069	160.925	75.8739	91.5329	3.64219	H1	promoter	ENSG00000156928	C7orf30	21.8257	19.1699	19.8242	15.2514
951	chr10	115614550	115614749	202.115	251.704	143.577	164.435	3.56494	H1	promoter	ENSG00000196865	NHLRC2	4.71082	4.44565	3.84848	5.14217
952	chr6	86352700	86352899	174.099	224.195	113.227	135.274	3.87296	H1	exon	ENSG00000135316	SYNCRIP	86.2483	90.5217	80.3483	75.9479
953	chr6	159206200	159206399	94.0535	122.413	61.8664	72.0922	3.03643	H1	intron	ENSG00000233893	RP11-507C10.5	0	0	1.22514	0
954	chr7	99699350	99699549	70.0398	100.406	36.186	46.1714	3.69222	H1	exon	ENSG00000166997	CNPY4	34.3699	28.4859	29.4298	28.4551
955	chr8	141474200	141474399	58.033	81.1504	29.1823	38.0712	3.36951	H1	intergenic	ENSG00000167632	TRAPPC9	6.98514	8.2819	10.3139	11.339
956	chr18	45529200	45529399	94.0535	138.918	38.5206	55.8917	4.60057	H1	intergenic	ENSG00000175387	SMAD2	6.77186	6.91335	6.46047	8.46271
957	chr1	193091300	193091499	310.176	378.243	225.287	250.298	3.99855	H1	promoter	ENSG00000134371	CDC73	27.6531	30.274	31.4569	30.6947
958	chr14	35874000	35874199	214.122	281.963	129.569	153.095	4.57956	H1	intergenic	ENSG00000100906	NFKBIA	25.3565	47.1388	34.8999	27.5524
959	chr7	1100250	1100449	162.092	221.444	89.8814	122.314	4.42935	H1	intron	ENSG00000164849	GPR146	14.8843	10.9967	4.35678	13.651
960	chr19	19051600	19051799	146.083	188.434	94.5506	117.454	3.58283	H1	intron	ENSG00000051128	HOMER3	55.753	54.5435	55.4091	43.6481
961	chr12	50050350	50050549	194.11	240.7	136.573	161.195	3.46891	H1	intron	ENSG00000110844	PRPF40B	10.4217	7.69205	12.384	7.78928
962	chr1	112058150	112058349	142.081	177.431	96.8852	115.834	3.19498	H1	intron	ENSG00000064703	DDX20	9.8113	12.2823	14.7091	12.0533
963	chr12	11802850	11803049	150.085	196.687	89.8814	115.834	3.94839	H1	promoter	ENSG00000139083	ETV6	10.9113	17.2254	27.6392	21.958
964	chr7	45150850	45151049	162.092	204.939	117.896	135.274	3.21191	H1	intron	ENSG00000136270	TBRG4	38.5189	35.7298	48.0808	31.5906
965	chr11	35684500	35684699	110.063	152.673	64.201	81.8125	3.86567	H1	promoter	ENSG00000166326	TRIM44	31.5045	31.7217	25.683	31.5429
966	chr8	48646650	48646849	22.0125	37.1366	5.83646	12.1504	3.26953	H1	intron	ENSG00000251354	RP11-697N18.1	0.993376	0.672164	0.825613	0.880378
967	chr12	50100250	50100449	230.131	290.216	157.584	187.116	3.93948	H1	intron	ENSG00000135436	FAM186B	0.203836	0.300083	0.384209	0.468215
968	chr11	12398800	12398999	158.09	210.441	96.8852	122.314	4.04349	H1	promoter	ENSG00000197702	PARVA	121.444	122.04	126.312	122.543
969	chr6	5997100	5997299	50.0284	72.8978	24.5131	34.8311	3.27732	H1	promoter	ENSG00000124785	NRN1	9.3902	10.0767	8.9982	15.5665
970	chr12	104359750	104359949	110.063	141.669	75.8739	89.9128	2.96477	H1	promoter	ENSG00000139372	TDG	20.8571	27.1212	26.0193	22.2449
971	chr17	2907250	2907449	110.063	147.171	68.8702	86.6727	3.47075	H1	intron	NA	NA	NA	NA	NA	NA
972	chr11	128562850	128563049	88.7171	117.829	55.6409	69.3922	3.13152	H1	promoter	ENSG00000151702	FLI1	104.496	94.7316	122.64	98.207
973	chr11	66247550	66247749	162.092	218.693	99.2197	125.554	4.14473	H1	promoter	ENSG00000174483	BBS1	15.2244	12.3099	15.8838	14.0822
974	chr7	101961600	101961799	10.0057	20.6315	1.16729	4.05013	3.04634	H1	intron	ENSG00000170409	CTA-313A17.2	0	0	0	0.0801267
975	chr8	41290650	41290849	10.0057	20.6315	1.16729	4.05013	3.04634	H1	intergenic	ENSG00000238936	SNORD65	0	121.838	0	0
976	chr12	117171150	117171349	10.0057	20.6315	1.16729	4.05013	3.04634	H1	intron	ENSG00000111412	C12orf49	19.7243	20.3065	22.6362	31.4553
977	chr20	10652500	10652699	62.0353	89.403	38.5206	46.1714	3.09911	H1	intron	ENSG00000101384	JAG1	6.22925	6.55558	5.63603	4.56372
978	chr2	172016450	172016649	82.0466	122.413	47.8589	59.1318	3.79988	H1	intron	ENSG00000198586	TLK1	46.9999	55.5724	57.8554	54.0563
979	chr17	16119100	16119299	106.06	152.673	66.5356	81.8125	3.79886	H1	intergenic	ENSG00000141027	NCOR1	47.7541	50.1285	46.0521	40.3127
980	chr19	2475400	2475599	58.033	94.9047	26.8477	39.6912	3.9971	H1	promoter	ENSG00000099860	GADD45B	19.3123	26.3223	18.3172	22.4514
981	chr14	59950550	59950749	31.3512	51.8079	15.1748	20.7906	3.1294	H1	promoter	ENSG00000050130	JKAMP	34.3885	32.9475	38.4423	34.7165
982	chr10	75910950	75911149	74.0421	119.662	38.5206	51.0316	4.1725	H1	promoter	ENSG00000156110	ADK	51.7445	49.6904	40.1183	28.6461
983	chr20	49575600	49575799	74.0421	116.912	40.8552	52.6516	3.97825	H1	promoter	ENSG00000124217	MOCS3	4.87491	3.44771	4.53341	4.43702
984	chr5	141061750	141061949	58.033	89.403	33.8514	42.9313	3.40493	H1	exon	ENSG00000120318	ARAP3	51.9656	44.6883	45.7996	44.52
985	chr20	34471500	34471699	86.0489	136.168	45.5244	60.7519	4.26368	H1	intron	ENSG00000199676	Y_RNA	0	16.8045	0	0
986	chr22	42467100	42467299	126.072	177.431	87.5468	96.393	3.75384	H1	intergenic	ENSG00000198951	NAGA	19.2311	15.8413	17.4822	17.4807
987	chr1	36788900	36789099	58.033	92.1538	31.5169	38.0712	3.75645	H1	intron	ENSG00000142694	FAM176B	12.9953	11.0509	12.3455	10.2684
988	chr3	183903300	183903499	126.072	169.178	92.216	101.253	3.27973	H1	promoter	ENSG00000090539	CHRD	0.0175774	0.101348	0.0840123	0
989	chr9	131655100	131655299	55.3648	80.2335	34.6296	39.6912	3.00143	H1	intron	ENSG00000171097	CCBL1	5.3426	5.73668	4.38574	2.89931
990	chr19	47104600	47104799	90.0512	138.918	50.1935	59.1318	4.24551	H1	promoter	ENSG00000160014	CALM3	270.327	260.117	264.494	225.45
991	chr1	72747650	72747849	54.0307	83.9013	29.1823	34.8311	3.59332	H1	intron	ENSG00000172260	NEGR1	12.5729	13.1487	19.2718	4.45668
992	chr21	40752600	40752799	86.0489	125.164	54.8627	63.992	3.56962	H1	promoter	NA	NA	NA	NA	NA	NA
993	chr5	149865350	149865549	78.0444	111.41	50.1935	57.5118	3.3383	H1	intergenic	ENSG00000070614	NDST1	32.2659	32.4305	40.1397	36.8859
994	chr7	27169950	27170149	34.0193	53.6418	17.5094	21.8707	3.04206	H1	exon	ENSG00000253552	AC004080.12	3.18794	3.02289	2.92811	4.00974
995	chr1	47696600	47696799	68.7057	102.24	43.968	51.5716	3.33206	H1	intergenic	ENSG00000162367	TAL1	73.6458	59.9279	58.6211	41.4648
996	chr1	114302500	114302699	70.0398	101.323	46.3025	53.7317	3.13562	H1	intergenic	ENSG00000116793	PHTF1	64.3711	56.4453	50.4263	57.2621
997	chr12	861900	862099	46.0262	81.1504	19.8439	28.3509	4.07227	H1	promoter	ENSG00000060237	WNK1	44.711	43.7175	63.1294	44.3297
998	chr6	44010600	44010799	74.0421	133.417	29.1823	44.5514	4.91248	H1	intergenic	ENSG00000237686	RP5-1120P11.1	0.00278749	0.0283958	0.0320408	0
999	chr7	27140650	27140849	226.129	323.226	155.25	179.016	4.64337	H1	promoter	ENSG00000105991	HOXA1	1.10525	0.585954	1.10699	0.894014
1000	chr22	43335850	43336049	82.0466	116.912	57.6642	64.64	3.12434	H1	intron	ENSG00000100266	PACSIN2	67.5794	61.0809	79.3304	47.3888
1001	chr7	30517900	30518099	434.247	562.551	342.016	368.561	4.50441	H1	intron	ENSG00000106100	NOD1	15.9962	12.8028	15.5793	15.9069
1002	chr17	55946350	55946549	66.0375	101.323	40.8552	48.3315	3.50094	H1	intron	ENSG00000181610	MRPS23	53.3181	44.024	56.2791	38.5152
1003	chr1	201683650	201683849	150.085	210.441	108.558	119.074	3.83426	H1	intron	ENSG00000134369	NAV1	29.6892	36.2792	27.9975	29.2738
1004	chr1	110091500	110091699	106.06	160.925	66.5356	76.9524	4.12521	H1	promoter	ENSG00000065135	GNAI3	39.8367	40.5038	40.4502	38.3904
1005	chr1	32817450	32817649	78.0444	114.161	52.5281	59.1318	3.33258	H1	intergenic	ENSG00000231176	RP4-811H24.10	0	0	0	0.4051
1006	chr3	50286600	50286799	47.3602	67.3961	24.5131	28.8909	3.19043	H1	intron	ENSG00000230454	U73166.2	0.711929	0.776512	1.30731	0.585385
1007	chr11	73042750	73042949	30.0171	45.3892	12.8402	17.0105	3.03193	H1	intron	ENSG00000110237	ARHGEF17	19.7048	23.8697	28.335	37.0335
1008	chr1	108742750	108742949	50.0284	75.6487	22.1785	28.3509	3.73449	H1	exon	ENSG00000085491	SLC25A24	14.665	13.9943	13.069	15.8678
1009	chr1	153895150	153895349	102.058	141.669	59.5318	68.8521	3.89573	H1	intron	ENSG00000143614	GATAD2B	12.6725	12.2903	13.1641	13.8061
1010	chr10	82214100	82214299	150.085	207.69	96.8852	106.113	4.19266	H1	promoter	ENSG00000108219	TSPAN14	92.2413	91.7999	94.1279	92.346
1011	chr9	127068900	127069099	142.081	196.687	92.216	102.873	4.06651	H1	intron	ENSG00000235204	RP11-121A14.2	0.539707	1.07097	0	0
1012	chr1	154299300	154299499	52.6966	78.3995	28.4041	33.7511	3.40269	H1	promoter	ENSG00000143515	ATP8B2	22.7858	21.5119	24.7847	29.615
1013	chr7	150691550	150691749	170.097	232.448	110.893	123.934	4.24453	H1	promoter	ENSG00000164867	NOS3	94.6608	79.2211	62.1464	56.5907
1014	chr5	43066600	43066799	87.383	118.746	55.6409	61.8319	3.35072	H1	exon	ENSG00000172262	ZNF131	17.2945	17.8115	18.7445	22.1868
1015	chr14	31676500	31676699	154.088	207.69	99.2197	109.353	4.10401	H1	exon	ENSG00000092148	HECTD1	73.8094	75.8737	95.1816	83.4245
1016	chr7	23510600	23510799	126.072	171.929	80.5431	91.5329	3.84778	H1	intergenic	ENSG00000136231	IGF2BP3	108.237	96.243	83.5836	46.9627
1017	chr19	8460250	8460449	50.0284	75.6487	24.5131	29.9709	3.57492	H1	intron	ENSG00000185236	RAB11B	75.3934	78.4683	86.5282	65.4064
1018	chrX	53112000	53112199	34.0193	59.1435	8.17104	13.7704	4.21156	H1	promoter	ENSG00000184205	TSPYL2	12.108	25.1136	26.4545	14.7751
1019	chr2	85728900	85729099	30.0171	48.1401	12.8402	18.6306	3.14217	H1	intergenic	ENSG00000168906	MAT2A	147.987	133.406	152.223	124.576
1020	chr10	112631650	112631849	54.0307	83.9013	26.8477	36.4511	3.6425	H1	promoter	ENSG00000150593	PDCD4	86.1219	79.7415	57.183	76.2371
1021	chr7	6143850	6144049	54.0307	78.3995	31.5169	39.6912	3.05279	H1	promoter	ENSG00000106346	USP42	6.06003	5.50454	5.82734	6.21546
1022	chr3	114865650	114865849	54.0307	78.3995	29.1823	38.0712	3.22306	H1	intron	ENSG00000181722	ZBTB20	4.72177	5.1841	5.20711	7.22824
1023	chr16	83986850	83987049	52.6966	81.1504	25.2913	35.3711	3.62079	H1	promoter	ENSG00000140961	OSGIN1	1.8668	2.93109	2.94897	1.09346
1024	chr7	99699400	99699599	58.033	89.403	29.1823	38.0712	3.73155	H1	exon	ENSG00000166997	CNPY4	34.3699	28.4859	29.4298	28.4551
1025	chr20	18119000	18119199	98.0557	138.918	61.8664	72.0922	3.66965	H1	promoter	ENSG00000149474	CSRP2BP	3.78993	3.51823	3.66112	4.14787
1026	chr1	204332200	204332399	86.0489	136.168	40.8552	54.2717	4.49957	H1	intergenic	ENSG00000143850	PLEKHA6	4.2266	1.85668	1.11877	1.39039
1027	chr12	122885450	122885649	22.0125	37.1366	8.17104	12.1504	3.06612	H1	intron	ENSG00000130779	CLIP1	23.0931	29.3859	24.8836	27.8981
1028	chr8	101733450	101733649	18.0102	31.6349	5.83646	8.91028	3.05734	H1	intron	ENSG00000070756	PABPC1	1345.85	1251.68	1275.29	1566.21
1029	chr2	61293050	61293249	66.0375	114.161	22.1785	33.211	4.85489	H1	promoter	ENSG00000162929	KIAA1841	13.7162	8.48199	8.75786	15.7686
1030	chr12	89769300	89769499	38.0216	61.8944	15.1748	21.8707	3.65676	H1	intergenic	ENSG00000139318	DUSP6	67.5357	115.776	93.4625	75.0999
1031	chr17	79478700	79478899	118.067	163.676	73.5393	85.0526	3.89054	H1	intron	ENSG00000184009	ACTG1	2953.81	2794.17	3171.16	2807.99
1032	chr2	36582950	36583149	66.0375	92.1538	40.8552	47.7915	3.08802	H1	promoter	ENSG00000150938	CRIM1	259.019	326.706	355.932	334.972
1033	chr6	149638250	149638449	106.06	149.922	64.201	75.3323	3.8953	H1	intergenic	ENSG00000055208	TAB2	22.9523	24.6295	27.2513	24.1945
1034	chr3	119217600	119217799	258.147	314.974	141.242	183.876	4.73173	H1	promoter	ENSG00000113845	TIMMDC1	72.2053	55.0254	54.2809	68.3753
1035	chr19	13214500	13214699	78.0444	105.908	22.1785	44.5514	4.43746	H1	intergenic	ENSG00000104903	LYL1	27.065	22.2908	18.637	14.859
1036	chr1	36838300	36838499	90.0512	111.41	50.1935	65.612	3.19638	H1	intron	ENSG00000196182	STK40	9.8326	9.59625	11.4072	7.64559
1037	chr7	27185000	27185199	142.081	166.427	94.5506	112.594	2.96884	H1	promoter	ENSG00000105997	HOXA3	5.772	4.21094	3.24845	6.38329
1038	chr12	31742750	31742949	106.06	136.168	54.8627	72.0922	3.82482	H1	intron	ENSG00000170456	DENND5B	5.85873	6.31258	6.71659	4.29306
1039	chr2	70369200	70369399	106.06	130.666	57.1973	73.7123	3.55396	H1	intergenic	ENSG00000231327	AC016700.5	0.685471	0.391435	0.403304	0
1040	chr11	118784400	118784599	190.108	232.448	106.223	133.654	4.27453	H1	intergenic	ENSG00000110375	UPK2	0.145613	0	0.0863885	0
1041	chr4	87813350	87813549	50.0284	70.147	12.8402	25.1108	4.05253	H1	exon	ENSG00000172493	AFF1	30.5961	26.635	21.3312	22.7293
1042	chr16	3071150	3071349	122.069	160.925	47.8589	73.7123	4.64725	H1	promoter	ENSG00000006327	TNFRSF12A	104.164	132.81	96.1892	53.5447
1043	chr2	20189500	20189699	106.06	130.666	59.5318	75.3323	3.43852	H1	intron	ENSG00000118965	WDR35	2.39603	2.90785	2.63042	3.60711
1044	chr17	75421650	75421849	38.0216	50.8909	13.6184	21.8707	3.1538	H1	intron	NA	NA	NA	NA	NA	NA
1045	chr3	52081650	52081849	158.09	185.683	99.2197	117.454	3.44747	H1	intergenic	ENSG00000164086	DUSP7	9.33853	8.88192	12.0931	12.2995
1046	chr1	59042600	59042799	66.0375	81.1504	26.8477	39.6912	3.50731	H1	exon	ENSG00000184292	TACSTD2	16.5395	16.5909	30.3198	22.2981
1047	chr1	2210450	2210649	134.076	155.424	80.5431	96.393	3.33132	H1	intron	ENSG00000178642	AL513477.1	0.102198	0.165663	0	0.0326319
1048	chr17	74497200	74497399	62.0353	78.3995	22.1785	34.8311	3.72186	H1	intron	ENSG00000129667	RHBDF2	6.33286	6.80882	5.85538	6.39092
1049	chr3	195613700	195613899	182.103	213.192	110.893	133.654	3.74262	H1	intron	ENSG00000224614	AC124944.2	0	0.162044	0.077087	0
1050	chr9	101983900	101984099	134.076	160.925	71.2048	93.1529	3.82075	H1	exon	ENSG00000119523	ALG2	19.0232	19.4047	24.1423	21.8524
1051	chr1	26606650	26606849	178.101	215.943	85.2122	119.074	4.51938	H1	promoter	ENSG00000142669	SH3BGRL3	278.637	260.612	279.894	244.748
1052	chr3	40351550	40351749	102.058	119.662	59.5318	75.3323	3.01761	H1	promoter	ENSG00000114784	EIF1B	88.9734	79.716	84.7767	69.5683
1053	chr3	101231800	101231999	246.14	290.216	141.242	180.636	4.36324	H1	intron	ENSG00000138468	SENP7	5.19847	7.88882	3.70538	6.31666
1054	chr20	48429500	48429699	154.088	185.683	59.5318	94.773	4.71312	H1	promoter	ENSG00000197818	SLC9A8	8.19036	10.1581	9.0105	6.53271
1055	chr9	130317650	130317849	130.074	160.925	47.8589	78.5724	4.6237	H1	intron	ENSG00000136830	FAM129B	67.2901	76.4576	60.32	75.7528
1056	chr18	20892950	20893149	34.0193	42.6383	10.5056	17.0105	3.08293	H1	intron	NA	NA	NA	NA	NA	NA
1057	chr7	99684350	99684549	170.097	193.936	103.889	122.314	3.55506	H1	intergenic	ENSG00000168090	COPS6	272.904	252.776	243.565	220.551
1058	chr7	99686350	99686549	83.3807	97.6556	43.1898	53.7317	3.20792	H1	promoter	ENSG00000168090	COPS6	272.904	252.776	243.565	220.551
1059	chr17	80189150	80189349	98.0557	119.662	36.186	52.6516	4.29763	H1	intron	ENSG00000141526	SLC16A3	50.2261	45.1904	45.4146	43.2818
1060	chr15	82338800	82338999	342.194	389.247	213.614	243.818	4.51122	H1	intergenic	ENSG00000183496	MEX3B	4.77793	4.9109	5.73003	5.92957
1061	chr10	8093450	8093649	102.058	125.164	38.5206	52.6516	4.3864	H1	exon	ENSG00000232638	RP11-379F12.4	0	0	0.61858	0
1062	chr4	48915850	48916049	54.0307	70.147	5.83646	17.0105	4.6452	H1	intergenic	ENSG00000145247	OCIAD2	543.765	638.426	499.864	526.639
1063	chr6	4583250	4583449	54.0307	64.6452	22.1785	29.9709	3.2192	H1	intergenic	ENSG00000205444	RP4-529N6.1	0.714793	0.485802	0.210791	0.418593
1064	chr10	65225150	65225349	66.0375	81.1504	22.1785	33.211	3.90866	H1	intron	ENSG00000171988	JMJD1C	29.2845	61.0932	40.7649	43.087
1065	chr7	16460900	16461099	106.06	122.413	64.201	72.0922	3.0648	H1	exon	ENSG00000214960	ISPD	0.810746	0.914982	0.796401	1.65931
1066	chr10	8104750	8104949	170.097	196.687	103.889	117.454	3.70032	H1	intron	ENSG00000107485	GATA3	22.2134	13.4909	6.64366	10.0228
1067	chr16	128400	128599	170.097	202.188	92.216	107.733	4.23118	H1	promoter	ENSG00000103152	MPG	47.9716	46.728	68.0109	46.822
1068	chr5	176449900	176450099	98.0557	114.161	59.5318	67.2321	2.96481	H1	promoter	ENSG00000113761	ZNF346	15.5605	12.245	11.863	13.0909
1069	chr11	12205200	12205399	65.2371	79.4999	32.4507	39.3672	3.16318	H1	intron	ENSG00000254680	RP11-265D17.2	0.784871	0	2.88346	1.78673
1070	chr16	87096800	87096999	94.0535	114.161	45.5244	55.8917	3.7421	H1	intergenic	ENSG00000232190	AC106745.1	0.057599	0.0399823	0.0337629	0.0683465
1071	chr11	65479650	65479849	310.176	350.735	211.28	235.717	3.91807	H1	promoter	ENSG00000172977	KAT5	44.5677	55.3748	40.4131	43.9763
1072	chr2	175862750	175862949	54.0307	67.3961	22.1785	29.9709	3.3414	H1	intron	ENSG00000128656	CHN1	23.1629	25.9795	19.3618	17.5881
1073	chr7	116515850	116516049	54.0307	67.3961	22.1785	29.9709	3.3414	H1	intron	ENSG00000235945	AC002543.2	0.0234014	0.043778	0.0372473	0
1074	chr19	50144750	50144949	170.097	204.939	89.8814	110.973	4.28399	H1	promoter	ENSG00000126461	SCAF1	19.796	17.5393	16.1701	18.333
1075	chr15	83735650	83735849	190.108	215.943	129.569	146.615	3.19792	H1	exon	ENSG00000064726	BTBD1	30.5324	37.4639	35.8848	38.8575
1076	chr13	30996450	30996649	54.0307	70.147	24.5131	33.211	3.22058	H1	intergenic	ENSG00000225039	RP11-223E19.2	0	0.136687	0.238134	0
1077	chr10	52383900	52384099	258.147	295.718	187.934	208.176	3.32343	H1	intergenic	ENSG00000198964	SGMS1	9.84904	8.63569	7.16561	10.2719
1078	chr8	42011050	42011249	70.0398	86.6521	38.5206	47.7915	2.96115	H1	promoter	ENSG00000070718	AP3M2	11.8123	18.1243	20.5248	17.627
1079	chr21	30589750	30589949	34.0193	45.3892	12.8402	18.6306	2.97954	H1	intron	ENSG00000156273	BACH1	9.896	24.7946	29.4844	27.8381
1080	chr13	27998850	27999049	94.0535	122.413	43.1898	57.5118	4.01848	H1	promoter	ENSG00000122034	GTF3A	67.7837	57.2938	47.8265	63.7625
1081	chr11	76381750	76381949	42.0239	53.6418	17.5094	23.4907	3.02176	H1	exon	ENSG00000137507	LRRC32	35.5809	36.8561	20.1205	32.9282
1082	chr7	35044800	35044999	38.0216	50.8909	10.5056	17.0105	3.58288	H1	intron	ENSG00000173852	DPY19L1	39.2887	37.8384	44.1307	39.3743
1083	chr12	1100400	1100599	46.0262	59.1435	19.8439	26.7308	3.08853	H1	promoter	ENSG00000082805	ERC1	19.3916	24.6199	14.6704	19.9443
1084	chr11	65819400	65819599	126.072	152.673	71.2048	85.0526	3.68649	H1	promoter	ENSG00000087365	SF3B2	173.328	166.644	164.082	154.967
1085	chr8	30360850	30361049	58.033	72.8978	26.8477	34.8311	3.21493	H1	intron	ENSG00000254109	CTD-3107M8.4	0.439921	0.133331	0	0.115528
1086	chr8	8154550	8154749	194.11	237.949	113.227	133.654	4.25795	H1	intergenic	ENSG00000253981	RP11-556O5.4	0.10052	1.0484	0.205583	0
1087	chr13	41634500	41634699	198.113	237.949	124.9	141.754	3.94377	H1	intergenic	ENSG00000120690	ELF1	30.3605	42.1607	39.527	34.5986
1088	chr1	93250550	93250749	58.033	75.6487	24.5131	31.591	3.56515	H1	intron	ENSG00000067208	EVI5	9.5753	13.738	14.4384	9.43179
1089	chr17	4433650	4433849	46.0262	60.0605	19.0658	25.1108	3.25377	H1	intron	ENSG00000132382	MYBBP1A	11.2832	9.90739	10.1091	7.74618
1090	chr1	8938300	8938499	250.142	306.721	124.9	144.995	5.1743	H1	promoter	ENSG00000074800	ENO1	1817.08	1438.72	1695.17	1024.1
1091	chr12	105066550	105066749	58.033	72.8978	24.5131	29.9709	3.51197	H1	intron	ENSG00000245335	AC079316.1	0.0463789	0.106224	0.065263	0.03305
1092	chr14	105660450	105660649	84.7148	104.074	42.4116	49.9516	3.59062	H1	intergenic	ENSG00000183828	NUDT14	31.3388	28.6286	27.325	24.4358
1093	chr5	141061850	141062049	310.176	378.243	162.253	187.116	5.33258	H1	intergenic	ENSG00000120318	ARAP3	51.9656	44.6883	45.7996	44.52
1094	chr2	220071550	220071749	98.0557	122.413	47.8589	55.8917	3.94099	H1	promoter	ENSG00000158552	ZFAND2B	20.0663	14.4246	17.745	12.9493
1095	chr16	4322150	4322349	74.0421	97.6556	26.8477	34.8311	4.25273	H1	intron	ENSG00000090447	TFAP4	4.19352	3.47084	3.42084	3.72778
1096	chr2	27851950	27852149	190.108	229.697	106.223	122.314	4.37061	H1	promoter	ENSG00000163798	SLC4A1AP	13.984	11.9702	10.9057	10.9451
1097	chr3	194882350	194882549	110.063	138.918	50.1935	60.7519	4.2776	H1	intron	ENSG00000206600	U6	1.21357	0.346519	0	0
1098	chr17	79480700	79480899	134.076	166.427	66.5356	78.5724	4.31077	H1	intergenic	ENSG00000229848	RP13-766D20.2	0	0.196128	0	0
1099	chr2	242255450	242255649	86.0489	111.41	40.8552	46.1714	3.98757	H1	promoter	ENSG00000115677	HDLBP	586.096	594.56	639.465	666.409
1100	chr5	140998200	140998399	98.0557	130.666	40.8552	47.7915	4.51998	H1	intron	ENSG00000120318	ARAP3	51.9656	44.6883	45.7996	44.52
1101	chr9	4662550	4662749	58.033	72.8978	31.5169	34.8311	2.96925	H1	promoter	ENSG00000106686	C9orf68	2.0425	3.90211	4.84788	3.08434
1102	chr16	67571450	67571649	238.135	303.97	124.9	141.754	5.13251	H1	promoter	ENSG00000039523	FAM65A	29.8452	34.1281	34.1116	32.7967
1103	chr12	76423900	76424099	238.135	281.963	159.919	172.535	3.94422	H1	intron	ENSG00000139289	PHLDA1	25.7619	39.8379	25.7915	38.4497
1104	chr4	7957850	7958049	202.115	243.451	127.235	141.754	4.02996	H1	intergenic	ENSG00000196526	AFAP1	23.5854	21.2981	22.6014	19.4407
1105	chr1	84972050	84972249	374.213	452.517	227.622	253.538	5.08335	H1	intron	ENSG00000122432	SPATA1	3.30768	5.0334	3.54519	5.81931
1106	chr22	37881750	37881949	214.122	254.455	136.573	151.475	3.99882	H1	intron	ENSG00000100060	MFNG	84.7713	74.5823	79.6397	64.4251
1107	chr8	16884400	16884599	134.076	166.427	73.5393	85.0526	4.02984	H1	promoter	ENSG00000155970	EFHA2	1.16652	4.25737	4.75117	2.94095
1108	chr12	50176700	50176899	42.0239	56.3927	17.5094	21.8707	3.25126	H1	intergenic	ENSG00000135436	FAM186B	0.203836	0.300083	0.384209	0.468215
1109	chr3	71632200	71632399	62.0353	78.3995	33.8514	39.6912	2.98386	H1	intron	ENSG00000114861	FOXP1	51.6184	45.4657	53.2071	34.535
1110	chr15	89089550	89089749	126.072	158.175	71.2048	81.8125	3.8944	H1	intron	ENSG00000140543	DET1	8.90355	11.3818	6.69994	14.803
1111	chr12	25539300	25539499	80.7125	106.825	40.8552	47.2515	3.7765	H1	intergenic	NA	NA	NA	NA	NA	NA
1112	chr2	135676700	135676899	182.103	213.192	134.238	141.754	3.01497	H1	promoter	ENSG00000224043	AC016725.4	5.20122	1.40226	4.78489	3.94989
1113	chr1	156883300	156883499	18.0102	28.884	1.16729	4.05013	3.6701	H1	intron	ENSG00000160838	LRRC71	0.364136	0.395516	0.489895	0.179241
1114	chr11	57103000	57103199	94.0535	122.413	50.1935	57.5118	3.79987	H1	intron	ENSG00000149136	SSRP1	73.5348	67.0005	70.0875	55.8931
1115	chr4	56212300	56212499	42.0239	56.3927	19.8439	23.4907	3.03001	H1	promoter	ENSG00000128039	SRD5A3	8.93586	14.7359	15.1589	12.9052
1116	chr4	77871150	77871349	114.065	155.424	50.1935	60.7519	4.65631	H1	promoter	ENSG00000138758	2013-09-11	87.4252	80.08	74.2314	98.0024
1117	chr7	139026150	139026349	130.074	157.258	87.5468	93.1529	3.2009	H1	intron	ENSG00000146963	LUC7L2	84.481	87.3656	105.529	61.3612
1118	chr2	3383950	3384149	154.088	193.936	92.216	101.253	4.06694	H1	promoter	ENSG00000171853	TTC15	30.6269	28.1023	22.4744	27.7643
1119	chr5	170815100	170815299	102.058	136.168	47.8589	55.8917	4.3234	H1	promoter	ENSG00000181163	NPM1	5035.47	3937.56	4327.24	2968.86
1120	chr11	406700	406899	30.0171	45.3892	8.17104	12.1504	3.62314	H1	intron	ENSG00000185187	SIGIRR	37.5154	34.8731	34.9108	29.9341
1121	chr14	55033600	55033799	70.0398	92.1538	38.5206	44.5514	3.3127	H1	promoter	ENSG00000020577	SAMD4A	19.899	28.9981	40.6551	20.7484
1122	chr10	72141800	72141999	70.0398	89.403	40.8552	46.1714	3.03261	H1	intron	ENSG00000172731	LRRC20	11.3563	10.4133	6.04897	7.75067
1123	chr1	227505500	227505699	254.144	320.475	157.584	174.155	4.65153	H1	exon	ENSG00000143776	CDC42BPA	28.2306	37.9958	26.452	36.1039
1124	chr6	32936500	32936699	158.09	199.437	96.8852	107.733	4.00282	H1	promoter	ENSG00000204257	HLA-DMA	1.81777	2.19002	1.52836	2.03723
1125	chr4	114936950	114937149	134.076	166.427	89.8814	96.393	3.38219	H1	intergenic	ENSG00000180801	ARSJ	29.4464	24.6218	24.576	17.2704
1126	chr11	12257500	12257699	66.0375	89.403	31.5169	36.4511	3.71348	H1	intron	ENSG00000254680	RP11-265D17.2	0.784871	0	2.88346	1.78673
1127	chr2	25474750	25474949	110.063	138.918	68.8702	75.3323	3.43163	H1	intron	ENSG00000115138	POMC	0.0526011	0.123982	0.0927224	0.336958
1128	chr15	90546150	90546349	26.0148	39.8875	5.83646	8.91028	3.64211	H1	intron	ENSG00000140548	ZNF710	11.5948	11.593	15.3689	18.9727
1129	chr6	131384050	131384249	58.033	78.3995	31.5169	38.0712	3.12277	H1	intron	ENSG00000079819	EPB41L2	115.626	113.484	117.318	82.2808
1130	chrX	48455850	48456049	162.092	213.192	94.5506	112.594	4.28846	H1	promoter	ENSG00000101940	WDR13	38.4155	38.4328	42.0963	34.345
1131	chr12	122243250	122243449	90.0512	116.912	54.8627	63.992	3.26137	H1	promoter	ENSG00000139718	SETD1B	3.69857	2.85103	3.73872	3.51987
1132	chr2	148601500	148601699	150.085	196.687	92.216	106.113	4.03271	H1	promoter	ENSG00000121989	ACVR2A	7.00141	2.6481	3.71842	3.15146
1133	chr6	158492750	158492949	23.3466	36.2197	8.17104	11.6104	3.02522	H1	exon	ENSG00000078269	SYNJ2	17.5078	21.5241	25.4168	10.7212
1134	chr8	41655200	41655399	38.0216	53.6418	15.1748	20.2506	3.27952	H1	intron	ENSG00000029534	ANK1	0.656108	0.360145	0.623014	0.0149569
1135	chr9	123713900	123714099	50.0284	67.3961	24.5131	29.9709	3.16458	H1	promoter	ENSG00000119397	CNTRL	7.60043	6.4983	7.21938	5.56247
1136	chr9	139580950	139581149	86.0489	114.161	45.5244	54.2717	3.7147	H1	intron	ENSG00000169692	AGPAT2	11.7213	10.5318	12.9085	7.0891
1137	chr5	141337800	141337999	166.094	210.441	106.223	117.454	3.93553	H1	exon	ENSG00000013561	RNF14	71.0695	66.8921	68.3694	83.9415
1138	chr19	41770550	41770749	138.078	182.932	78.2085	89.9128	4.23714	H1	promoter	ENSG00000105323	HNRNPUL1	126.036	120.229	109.748	118.03
1139	chr1	226926300	226926499	114.065	147.171	71.2048	80.1925	3.54192	H1	intron	ENSG00000143772	ITPKB	29.566	59.0907	40.9784	43.9423
1140	chr19	39565400	39565599	26.0148	39.8875	8.17104	12.1504	3.26938	H1	intergenic	ENSG00000183760	AC011443.1	0.0136925	0.0284912	0.0722519	0
1141	chr12	123931050	123931249	174.099	204.939	124.9	136.894	3.05124	H1	intergenic	ENSG00000150977	RILPL2	13.2639	12.0949	19.3285	17.8086
1142	chr9	86322300	86322499	182.103	229.697	103.889	122.314	4.37286	H1	intron	ENSG00000135018	UBQLN1	97.6005	109.634	125.279	91.2985
1143	chr20	48606700	48606899	154.088	196.687	85.2122	101.253	4.27216	H1	intergenic	ENSG00000124216	SNAI1	5.20058	8.66412	3.31254	4.31185
1144	chr14	77416750	77416949	322.183	375.493	234.626	253.538	3.82146	H1	intergenic	ENSG00000243225	RP11-7F17.1	0.160519	0.428664	1.18976	1.85889
1145	chr11	76572200	76572399	102.058	127.915	57.1973	67.2321	3.57584	H1	promoter	ENSG00000078124	ACER3	25.1372	21.061	20.0758	15.3771
1146	chr3	196438950	196439149	62.0353	81.1504	33.8514	41.3113	3.06166	H1	promoter	ENSG00000174007	CEP19	1.02175	0.469252	0.869914	1.42083
1147	chr2	109150300	109150499	142.081	191.185	71.2048	89.9128	4.56709	H1	promoter	ENSG00000214184	AC012487.2	0	0.694736	1.41062	0.698153
1148	chr4	5755150	5755349	166.094	215.943	92.216	114.214	4.38068	H1	intron	ENSG00000072840	EVC	5.38013	5.49071	4.90125	3.70471
1149	chr10	93170200	93170399	62.0353	92.1538	17.5094	29.9709	4.4811	H1	intron	ENSG00000165338	HECTD2	1.50445	1.3705	2.32066	1.37014
1150	chr1	29537050	29537249	62.0353	86.6521	22.1785	33.211	4.05267	H1	intron	ENSG00000116353	MECR	17.6254	16.3358	19.5039	15.466
1151	chr12	54820450	54820649	162.092	202.188	101.554	115.834	3.85216	H1	intergenic	ENSG00000139572	GPR84	0	0.0293593	0	0
1152	chr16	81647800	81647999	30.0171	42.6383	10.5056	15.3905	3.11007	H1	intron	NA	NA	NA	NA	NA	NA
1153	chr1	36349400	36349599	30.0171	42.6383	10.5056	15.3905	3.11007	H1	promoter	ENSG00000092847	EIF2C1	8.98006	7.98705	9.1818	8.28437
1154	chr1	153748150	153748349	50.0284	61.8944	24.5131	26.7308	3.02098	H1	promoter	ENSG00000143554	SLC27A3	10.6974	7.92862	10.7403	10.5261
1155	chr13	40657400	40657599	74.0421	92.1538	36.186	39.6912	3.60526	H1	intergenic	NA	NA	NA	NA	NA	NA
1156	chr11	18656150	18656349	282.16	325.977	194.938	204.936	3.97075	H1	intergenic	ENSG00000179119	SPTY2D1	10.2535	11.3225	10.6977	8.46793
1157	chr2	28885700	28885899	30.0171	39.8875	10.5056	12.1504	3.13105	H1	intergenic	ENSG00000230730	AC074011.2	0.109345	0.207541	0	0
1158	chr8	42111800	42111999	14.008	20.6315	1.16729	2.43008	3.20055	H1	intergenic	ENSG00000253408	RP11-231D20.2	0	0	0.20502	0
1159	chr3	57961300	57961499	110.063	138.918	57.1973	60.7519	4.09871	H1	intergenic	ENSG00000136068	FLNB	311.583	320.469	308.696	246.407
1160	chr9	135545350	135545549	122.069	152.673	66.5356	70.4722	4.07889	H1	exon	ENSG00000125485	DDX31	5.48317	5.68745	6.72846	5.56022
1161	chrX	40013100	40013299	26.0148	37.1366	5.83646	7.29023	3.5892	H1	intron	ENSG00000183337	BCOR	9.82052	14.3302	12.1359	17.0214
1162	chr1	150551850	150552049	190.108	218.693	138.908	141.754	3.12703	H1	intron	ENSG00000143384	MCL1	65.805	112.134	66.3273	64.6191
1163	chr17	72745250	72745449	18.0102	26.1332	3.50187	4.05013	3.24614	H1	promoter	ENSG00000109062	SLC9A3R1	13.4246	10.7805	12.7435	14.266
1164	chr19	39894700	39894899	158.09	191.185	103.889	109.353	3.62046	H1	intergenic	ENSG00000128016	ZFP36	3.48032	53.6371	8.22269	10.5891
1165	chr1	201456350	201456549	22.0125	31.6349	5.83646	7.29023	3.1925	H1	intron	ENSG00000223396	RPS10P7	0.438535	0.432416	0.405322	0.513736
1166	chr5	180258400	180258599	214.122	246.202	159.919	164.435	3.12852	H1	exon	ENSG00000245060	CTC-205M6.2	4.83722	4.99864	4.11084	4.9256
1167	chr9	131674350	131674549	158.09	185.683	112.449	115.294	3.12926	H1	intron	ENSG00000171097	CCBL1	5.3426	5.73668	4.38574	2.89931
1168	chr10	103577800	103577999	166.094	204.939	101.554	106.113	4.09886	H1	exon	ENSG00000198408	MGEA5	80.444	82.8166	63.3521	63.6305
1169	chr3	180630900	180631099	110.063	136.168	66.5356	68.8521	3.57669	H1	promoter	ENSG00000145075	CCDC39	2.93398	4.32081	6.80839	4.92313
1170	chr7	27212650	27212849	162.092	202.188	96.8852	99.6331	4.22101	H1	intron	ENSG00000078399	HOXA9	23.4209	14.8249	22.6331	17.1628
1171	chr1	225998050	225998249	58.033	75.6487	31.5169	33.211	3.17636	H1	promoter	NA	NA	NA	NA	NA	NA
1172	chr1	94282050	94282249	46.0262	67.3961	12.8402	15.3905	4.2674	H1	intron	ENSG00000137936	BCAR3	15.0841	13.9401	10.0378	11.5102
1173	chr11	65190450	65190649	115.399	146.254	68.092	71.5522	3.8039	H1	promoter	ENSG00000245532	NEAT1	242.743	300.654	311.649	188.429
1174	chr19	48825550	48825749	143.415	173.763	96.8852	100.173	3.40065	H1	intergenic	ENSG00000105479	CCDC114	0	0.0205265	0.205287	0.104549
1175	chr15	34634950	34635149	218.124	268.209	145.911	151.475	4.11641	H1	intron	ENSG00000182117	NOP10	841.223	785.533	789.153	695.397
1176	chr7	100744200	100744399	134.076	177.431	71.2048	76.9524	4.46752	H1	intergenic	ENSG00000169871	TRIM56	14.2388	10.4406	8.42349	13.2413
1177	chr12	118574000	118574199	62.0353	81.1504	33.8514	36.4511	3.24123	H1	promoter	ENSG00000176834	VSIG10	19.7982	16.9937	13.3873	16.3605
1178	chr9	116382500	116382699	191.442	229.697	133.46	140.134	3.57192	H1	intergenic	ENSG00000233817	RP11-168K11.3	0.522929	1.93162	1.03473	0.697776
1179	chr14	75407300	75407499	54.0307	70.147	29.1823	31.591	3.03607	H1	intergenic	ENSG00000119630	PGF	190.15	176.412	162.807	215.319
1180	chr4	76598150	76598349	190.108	246.202	117.896	122.314	4.46385	H1	intron	ENSG00000138769	CDKL2	0.11698	0.169645	0.123093	0.0557799
1181	chr6	3751300	3751499	86.0489	114.161	50.1935	52.6516	3.60629	H1	intron	ENSG00000168994	C6orf145	62.8382	85.8048	57.9879	62.081
1182	chr14	103589050	103589249	48.6943	66.4791	25.2913	26.7308	3.20483	H1	intergenic	ENSG00000185215	TNFAIP2	19.6489	21.0558	17.3135	20.4399
1183	chr20	62258750	62258949	31.3512	45.3892	12.8402	13.7704	3.22986	H1	intergenic	ENSG00000232442	CTD-3184A7.4	2.60468	3.24188	1.85385	1.33594
1184	chr11	100558400	100558599	90.0512	114.161	57.1973	60.7519	3.15839	H1	promoter	ENSG00000165895	ARHGAP42	2.63014	2.25178	1.97575	1.0738
1185	chrX	67913950	67914149	78.0444	103.157	43.1898	46.1714	3.58103	H1	intron	ENSG00000130052	STARD8	5.06498	5.48461	5.73785	6.41029
1186	chr11	2399650	2399849	178.101	232.448	106.223	112.594	4.5009	H1	intron	ENSG00000236264	RPL26P30	38.9349	37.8704	51.8491	31.7738
1187	chr11	120206550	120206749	158.09	196.687	106.223	110.973	3.67734	H1	promoter	ENSG00000196914	ARHGEF12	35.9309	40.952	37.0609	42.7743
1188	chr6	31529150	31529349	106.06	138.918	61.8664	65.612	3.83932	H1	intergenic	ENSG00000198563	DDX39B	357.982	345.068	346.519	246.673
1189	chr17	38474750	38474949	40.6898	55.4757	20.6221	22.4107	2.96767	H1	intron	ENSG00000131759	RARA	11.9309	15.8878	13.4666	10.7905
1190	chr7	142985550	142985749	54.0307	73.8148	29.1823	29.4309	3.31735	H1	promoter	ENSG00000106144	CASP2	35.1351	35.5769	42.5594	33.404
1191	chr16	67555100	67555299	138.078	191.185	71.2048	70.4722	4.85299	H1	intergenic	ENSG00000039523	FAM65A	29.8452	34.1281	34.1116	32.7967
1192	chr22	51094350	51094549	93.253	119.662	59.0649	59.1318	3.38351	H1	intergenic	ENSG00000099882	AC000036.5	3.26679	3.88156	2.47092	1.52491
1193	chr2	110872900	110873099	166.094	232.448	75.8739	73.7123	5.42801	H1	intron	ENSG00000144063	MALL	133.908	132.177	150.379	78.7087
1194	chr2	28904400	28904599	35.3534	49.974	15.953	15.3905	3.25541	H1	intergenic	ENSG00000230730	AC074011.2	0.109345	0.207541	0	0
1195	chr9	137289600	137289799	82.0466	105.908	50.1935	49.4115	3.37429	H1	intron	ENSG00000186350	RXRA	9.32432	9.39429	7.24168	7.53367
1196	chr6	74405000	74405199	382.217	447.015	292.99	292.419	3.99883	H1	promoter	ENSG00000156535	CD109	47.2822	50.7668	64.1498	76.6006
1197	chr14	105665100	105665299	62.0353	80.2335	37.7424	37.5312	2.98046	H1	intergenic	ENSG00000179364	PACS2	21.1135	20.5523	19.6126	22.3099
1198	chr1	94131350	94131549	54.0307	74.7317	26.0695	25.6508	3.64913	H1	intron	NA	NA	NA	NA	NA	NA
1199	chr11	6717100	6717299	166.094	202.188	108.558	109.353	3.84199	H1	intergenic	ENSG00000241678	RP11-732A19.1	0.484199	0.12336	0	0
1200	chr19	14248050	14248249	94.0535	114.161	61.8664	62.3719	2.97854	H1	promoter	ENSG00000248045	AC022098.3	1.246	1.31196	1.26562	1.00601
1201	chr2	187454350	187454549	262.149	328.728	157.584	161.195	4.92544	H1	promoter	ENSG00000138448	ITGAV	120.16	163.747	228.866	188.299
1202	chr1	24739900	24740099	86.0489	111.41	47.8589	49.4115	3.67951	H1	intron	ENSG00000001460	C1orf201	5.85642	5.37907	6.42599	8.45863
1203	chr17	36608950	36609149	234.133	295.718	141.242	143.374	4.79292	H1	intron	ENSG00000225485	ARHGAP23	27.7932	38.5208	43.2897	32.2535
1204	chr7	100427300	100427499	38.0216	51.9913	17.5094	17.6585	3.17777	H1	intergenic	ENSG00000146828	SLC12A9	21.2751	16.5462	19.9681	18.9923
1205	chr1	207495150	207495349	110.063	138.918	68.8702	68.8521	3.5976	H1	promoter	ENSG00000196352	CD55	72.5	94.7731	172.544	198.795
1206	chr21	46954100	46954299	70.0398	92.1538	38.5206	39.6912	3.47757	H1	intron	ENSG00000173638	SLC19A1	30.0658	29.0916	26.2233	36.1067
1207	chr7	32535250	32535449	166.094	199.437	117.896	119.074	3.37516	H1	promoter	ENSG00000105778	AVL9	14.3746	13.2905	16.437	21.7277
1208	chr9	127020600	127020799	150.085	196.687	85.2122	88.2927	4.46134	H1	promoter	ENSG00000119408	NEK6	23.9966	25.723	24.9475	20.4647
1209	chr8	10586950	10587149	107.394	135.251	69.6484	70.4722	3.39321	H1	intron	ENSG00000248896	CTD-2135J3.3	2.07727	0.95136	1.22114	0.51025
1210	chr19	49255050	49255249	2.00114	26.1332	10.5056	26.7308	3.17731	H1	intron	ENSG00000174951	FUT1	1.88929	2.95133	2.20405	3.57614
1211	chr17	39941750	39941949	82.0466	169.178	134.238	172.535	3.66288	H1	intron	ENSG00000128422	KRT17	0	0.167397	0	0
1212	chr1	226879250	226879449	22.0125	61.8944	43.1898	63.992	3.00069	H1	intron	ENSG00000143772	ITPKB	29.566	59.0907	40.9784	43.9423
1213	chr6	111303750	111303949	2.00114	37.1366	17.5094	33.211	3.52176	H1	promoter	ENSG00000197498	RPF2	24.2586	23.1806	28.987	18.2639
1214	chr17	38712850	38713049	38.0216	114.161	78.2085	107.733	3.83515	H1	intron	ENSG00000126353	CCR7	0	0.0974287	0.0989547	0
1215	chr6	4381100	4381299	82.0466	191.185	136.573	185.496	4.11728	H1	intergenic	ENSG00000231811	RP3-527G5.1	0	0	0	0.801267
1216	chr21	46891950	46892149	34.0193	83.9013	54.8627	73.7123	2.97159	H1	intron	ENSG00000182871	COL18A1	49.781	54.8789	55.454	60.3191
1217	chr2	25499200	25499399	6.00341	53.6418	26.8477	44.5514	3.75394	H1	intron	ENSG00000119772	DNMT3A	15.5868	12.3184	15.7515	12.7739
1218	chr1	41397050	41397249	30.0171	108.659	59.5318	93.1529	4.08423	H1	intergenic	ENSG00000228940	RP11-348A7.1	0.399558	0.412782	0.0880272	0.176938
1219	chr6	159239900	159240099	10.0057	48.1401	22.1785	39.6912	3.29575	H1	intron	ENSG00000092820	EZR	83.6075	74.4778	72.9235	79.254
1220	chr11	94277950	94278149	6.00341	39.8875	17.5094	26.7308	3.19083	H1	promoter	ENSG00000134627	PIWIL4	0.0124119	0.116691	0.0602694	0.302071
1221	chr4	18319900	18320099	6.00341	39.8875	17.5094	28.3509	3.20107	H1	intergenic	NA	NA	NA	NA	NA	NA
1222	chr19	48280350	48280549	14.008	53.6418	26.8477	39.6912	3.10881	H1	intergenic	ENSG00000178980	SEPW1	221.125	215.465	186.899	201.101
1223	chr5	172324350	172324549	106.06	224.195	148.246	190.356	3.97382	H1	intron	ENSG00000037241	RPL26L1	48.1511	33.5581	57.0877	45.7169
1224	chr3	129321050	129321249	38.0216	97.6556	61.8664	78.5724	3.21529	H1	intron	ENSG00000004399	PLXND1	368.368	370.156	426.614	506.071
1225	chr3	185001200	185001399	6.00341	45.3892	17.5094	33.211	3.5532	H1	promoter	ENSG00000073803	MAP3K13	14.938	16.7582	15.831	19.2217
1226	chr17	74724300	74724499	6.00341	39.8875	15.1748	29.9709	3.32381	H1	intron	ENSG00000181038	METTL23	10.1269	9.25597	11.4502	7.54859
1227	chr7	42951300	42951499	22.0125	64.6452	31.5169	47.7915	3.08292	H1	intron	ENSG00000106591	MRPL32	54.3992	40.0013	42.003	46.7615
1228	chr21	35055900	35056099	10.0057	50.8909	19.8439	36.4511	3.47747	H1	intron	NA	NA	NA	NA	NA	NA
1229	chr1	154377350	154377549	10.0057	45.3892	17.5094	33.211	3.24537	H1	promoter	ENSG00000160712	IL6R	3.92288	2.75098	3.47542	1.96712
1230	chr8	102148750	102148949	6.00341	28.884	3.50187	29.9709	3.57868	H1	intergenic	ENSG00000202360	7SK	0.290055	0.404378	0	0.0876045
1231	chr13	105640550	105640749	50.0284	97.6556	45.5244	104.493	3.68626	H1	intergenic	NA	NA	NA	NA	NA	NA
1232	chrY	15815600	15815799	10.0057	31.6349	12.8402	38.0712	3.047	H1	promoter	ENSG00000154620	TMSB4Y	0.530133	1.01854	0.440805	0.231414
1233	chr22	50363650	50363849	6.00341	26.1332	5.83646	31.591	3.37492	H1	intergenic	ENSG00000198355	PIM3	33.7886	36.0835	31.0449	47.2139
1234	chr17	73472050	73472249	54.0307	108.659	68.8702	122.314	3.55676	H1	intron	ENSG00000177728	KIAA0195	8.70999	8.58776	8.97283	8.43771
1235	chr20	57014500	57014699	54.0307	116.912	64.201	122.314	3.79689	H1	intron	ENSG00000124164	VAPB	28.9669	24.4856	24.5679	26.977
1236	chr12	124888700	124888899	6.00341	26.1332	3.50187	20.2506	3.10415	H1	intron	ENSG00000214650	RP11-83B20.1	0.0338473	0.105165	0	0.120553
1237	chr1	935200	935399	6.00341	31.6349	3.50187	23.4907	3.52137	H1	promoter	ENSG00000188290	HES4	2.80259	2.92009	4.15656	3.23478
1238	chr12	46005700	46005899	26.0148	61.8944	24.5131	52.6516	3.10933	H1	intergenic	ENSG00000239178	U6	0	2.6318	0	0
1239	chr19	55790950	55791149	22.0125	56.3927	19.8439	49.4115	3.24376	H1	exon	ENSG00000133265	HSPBP1	40.2321	39.9566	41.7361	25.9034
1240	chr5	178978700	178978899	2.00114	23.3823	3.50187	15.3905	3.22169	H1	intron	ENSG00000176783	RUFY1	29.9504	21.9856	23.326	33.7721
1241	chr6	52277250	52277449	2.00114	17.8806	1.16729	12.1504	2.98521	H1	intergenic	ENSG00000096093	EFHC1	7.72962	6.37242	6.48409	5.38215
1242	chr10	134225050	134225249	26.0148	64.6452	26.8477	52.6516	3.12092	H1	intron	ENSG00000171813	PWWP2B	1.25271	0.976171	1.49117	1.41155
1243	chr17	42298250	42298449	6.00341	28.884	5.83646	21.8707	3.10242	H1	intron	ENSG00000108312	UBTF	31.1994	26.544	28.0821	29.3492
1244	chr1	33722500	33722699	98.0557	177.431	96.8852	154.715	3.65071	H1	promoter	ENSG00000160094	ZNF362	13.7485	13.7894	13.7043	13.3811
1245	chr8	142402550	142402749	18.0102	53.6418	19.8439	46.1714	3.26028	H1	intergenic	ENSG00000184489	PTP4A3	4.61236	5.22993	7.61534	9.69431
1246	chr5	176937000	176937199	26.0148	72.8978	29.1823	62.3719	3.54149	H1	intron	ENSG00000146094	DOK3	3.17986	4.37121	4.13999	5.25025
1247	chr8	12612150	12612349	2.00114	31.6349	5.83646	26.7308	3.72739	H1	intron	ENSG00000154359	LONRF1	7.31789	8.01381	9.51087	7.51626
1248	chr9	124463700	124463899	6.00341	28.884	8.17104	25.1108	2.98891	H1	intron	ENSG00000229854	RP11-524G24.2	0.152614	0.392184	0.270154	0
1249	chr9	124381500	124381699	2.00114	20.6315	3.50187	17.0105	3.03871	H1	intron	ENSG00000136848	DAB2IP	14.2493	13.2503	12.1198	15.2349
1250	chr5	180076200	180076399	2.00114	26.1332	8.17104	23.4907	3.19828	H1	intron	ENSG00000037280	FLT4	8.66978	11.4553	9.93767	15.8263
1251	chr1	22221750	22221949	38.0216	97.6556	50.1935	81.8125	3.50633	H1	intron	ENSG00000142798	HSPG2	676.417	768.277	773.763	774.037
1252	chr13	110911450	110911649	26.0148	67.3961	36.186	59.1318	2.98463	H1	intron	NA	NA	NA	NA	NA	NA
1253	chr16	58116150	58116349	10.0057	56.3927	40.8552	49.4115	3.41686	H1	intergenic	ENSG00000070761	C16orf80	29.9286	24.9269	31.1263	26.5331
1254	chr17	1976100	1976299	26.0148	78.3995	61.8664	70.4722	3.1753	H1	intron	ENSG00000236838	AC090617.1	0.669576	0	0.147932	0.147809
1255	chr2	185463800	185463999	10.0057	59.1435	40.8552	42.9313	3.46087	H1	promoter	ENSG00000170396	ZNF804A	0.581773	0.493383	0.730703	0.369875
1256	chr15	34394600	34394799	2.00114	31.6349	19.8439	23.4907	3.023	H1	promoter	ENSG00000182405	PGBD4	0.576936	0.472568	0.707423	0.435236
1257	chr15	42066000	42066199	46.0262	111.41	87.5468	96.393	3.19965	H1	promoter	ENSG00000137802	MAPKBP1	14.2734	12.1246	13.7887	12.2665
1258	chr7	14030600	14030799	118.067	221.444	185.599	195.216	3.42838	H1	intron	ENSG00000006468	ETV1	8.80222	7.78056	8.75982	10.457
1259	chr20	42939250	42939449	6.00341	48.1401	29.1823	31.591	3.387	H1	intron	ENSG00000197296	FITM2	4.20998	3.28565	3.77504	3.95761
1260	chr3	127843100	127843299	106.06	199.437	159.919	166.055	3.24281	H1	intergenic	ENSG00000058262	SEC61A1	145.948	136.385	164.872	147.623
1261	chr19	48221800	48221999	2.00114	31.6349	17.5094	18.6306	3.07592	H1	exon	ENSG00000024422	EHD2	217.836	204.187	203.307	184.469
1262	chr3	72359300	72359499	50.0284	116.912	87.5468	88.2927	3.13394	H1	intergenic	NA	NA	NA	NA	NA	NA
1263	chr1	96881400	96881599	6.00341	61.8944	38.5206	39.6912	3.8582	H1	intergenic	ENSG00000234422	UBE2WP1	1.09503	1.53382	1.16907	1.90102
1264	chr1	26201750	26201949	6.00341	39.8875	22.1785	28.3509	3.04896	H1	intergenic	ENSG00000182749	PAQR7	5.78968	3.60031	4.39416	5.42885
1265	chr2	157292000	157292199	34.0193	89.403	61.8664	70.4722	3.05172	H1	promoter	ENSG00000115159	GPD2	21.6418	15.5192	17.7647	24.2171
1266	chr6	126239600	126239799	14.008	64.6452	36.186	46.1714	3.46703	H1	intron	ENSG00000111911	HINT3	4.61336	4.74174	5.56531	6.63472
1267	chr17	45771850	45772049	22.0125	75.6487	43.1898	55.8917	3.36434	H1	promoter	ENSG00000198933	TBKBP1	4.41148	3.52893	4.30945	5.30238
1268	chr16	770600	770799	18.0102	61.8944	54.8627	49.4115	3.02737	H1	promoter	ENSG00000103245	NARFL	8.49777	6.50007	9.82731	7.3869
1269	chr18	3653250	3653449	74.0421	169.178	157.584	144.995	3.74423	H1	intron	NA	NA	NA	NA	NA	NA
1270	chr1	94269100	94269299	6.00341	53.6418	47.8589	41.3113	3.6219	H1	intron	ENSG00000137936	BCAR3	15.0841	13.9401	10.0378	11.5102
1271	chr9	124534150	124534349	2.00114	45.3892	40.8552	38.0712	3.65544	H1	intron	ENSG00000229854	RP11-524G24.2	0.152614	0.392184	0.270154	0
1272	chr14	79441800	79441999	30.0171	86.6521	82.8777	75.3323	3.32336	H1	intron	NA	NA	NA	NA	NA	NA
1273	chr11	65139000	65139199	18.0102	67.3961	61.8664	55.8917	3.29831	H1	intergenic	ENSG00000162241	SLC25A45	1.14092	1.46449	1.91989	0.994504
1274	chr1	112059850	112060049	18.0102	61.8944	57.1973	52.6516	3.07275	H1	intron	ENSG00000064703	DDX20	9.8113	12.2823	14.7091	12.0533
1275	chr5	70883450	70883649	54.0307	125.164	108.558	93.1529	3.28022	H1	promoter	ENSG00000131844	MCCC2	12.72	12.2103	14.0114	13.2812
1276	chr6	89789900	89790099	50.0284	114.161	96.8852	85.0526	3.0866	H1	promoter	ENSG00000146278	PNRC1	44.6444	60.0092	60.1829	63.0002
1277	chr20	343450	343649	30.0171	94.9047	78.2085	68.8521	3.4771	H1	intergenic	ENSG00000225377	RP5-1103G7.4	4.31655	2.64632	2.48681	2.61814
1278	chr20	52516550	52516749	78.0444	174.68	145.911	132.034	3.62913	H1	intergenic	ENSG00000236352	AC005220.3	0.105056	0	0.185187	0.186032
1279	chr1	112057500	112057699	22.0125	105.908	78.2085	65.612	4.16728	H1	intron	ENSG00000064703	DDX20	9.8113	12.2823	14.7091	12.0533
1280	chr11	12106300	12106499	6.00341	39.8875	29.1823	23.4907	3.0251	H1	intergenic	ENSG00000255400	RP13-631K18.5	0.197051	0.201678	0.348254	0.347037
1281	chrY	21906300	21906499	22.0125	72.8978	59.5318	47.7915	3.20853	H1	exon	ENSG00000012817	KDM5D	5.53141	7.24968	5.19707	8.51844
1282	chr14	45366750	45366949	14.008	61.8944	47.8589	36.4511	3.35481	H1	promoter	ENSG00000179476	C14orf28	1.07821	1.07267	0.870683	1.58048
1283	chr17	65470700	65470899	2.00114	37.1366	26.8477	18.6306	3.38082	H1	intron	ENSG00000154217	PITPNC1	2.11416	2.2516	5.51113	2.62065
1284	chr16	67449500	67449699	6.00341	42.6383	29.1823	26.7308	3.13168	H1	intron	ENSG00000159714	ZDHHC1	2.26059	1.57987	1.9008	1.8137
1285	chr2	47210050	47210249	6.00341	45.3892	31.5169	29.9709	3.24437	H1	intron	ENSG00000068724	TTC7A	4.4686	4.06675	4.68085	2.77926
1286	chr14	90865400	90865599	26.0148	86.6521	66.5356	62.3719	3.40037	H1	intron	ENSG00000198668	CALM1	523.412	553.865	561.856	868.39
1287	chr10	88280900	88281099	30.0171	111.41	85.2122	80.1925	3.91392	H1	intron	ENSG00000062650	WAPAL	20.3924	22.2762	24.1308	20.1937
1288	chr1	154764650	154764849	10.0057	72.8978	57.1973	57.5118	3.91176	H1	intron	ENSG00000143603	KCNN3	0.807117	0.492485	0.80448	1.02892
1289	chr12	40618150	40618349	14.008	61.8944	50.1935	46.1714	3.28496	H1	promoter	ENSG00000188906	LRRK2	0.372939	0.345023	0.420119	0.406804
1290	chr12	112122950	112123149	14.008	67.3961	52.5281	47.7915	3.4848	H1	intron	ENSG00000089234	BRAP	7.53003	6.44688	9.6115	9.68275
1291	chr2	25322150	25322349	14.008	72.8978	57.1973	51.0316	3.67297	H1	intron	ENSG00000229593	SUCLA2P3	0.937379	0.645089	0.974711	0.864757
1292	chr1	247495300	247495499	14.008	53.6418	26.8477	34.8311	3.09049	H1	intergenic	ENSG00000162714	ZNF496	11.8457	13.5503	11.1873	10.7639
1293	chr4	2965900	2966099	6.00341	56.3927	22.1785	33.211	3.92591	H1	promoter	ENSG00000125388	GRK4	2.85996	2.60795	1.70136	5.26276
1294	chr16	2265550	2265749	30.0171	105.908	52.5281	68.8521	3.98977	H1	intergenic	ENSG00000184207	PGP	9.5736	7.88024	10.1787	7.99862
1295	chr20	4151600	4151799	74.0421	149.922	96.8852	114.214	3.23416	H1	intron	ENSG00000230176	RP4-779E11.3	0.482645	0	0	0
1296	chr16	70608950	70609149	78.0444	152.673	106.223	117.454	3.06911	H1	exon	ENSG00000157368	IL34	0.513359	0.315923	0.415813	0.510482
1297	chr17	75091750	75091949	26.0148	75.6487	43.1898	51.0316	3.11899	H1	intron	ENSG00000129657	SEC14L1	139.791	153.945	148.183	164.464
1298	chr5	140090000	140090199	6.00341	39.8875	17.5094	25.1108	3.18955	H1	promoter	ENSG00000199990	VTRNA1-1	0	0	0	17.5257
1299	chr17	62340100	62340299	18.0102	75.6487	38.5206	51.0316	3.66551	H1	intron	ENSG00000136478	TEX2	8.51535	7.60495	9.88336	9.21833
1300	chr7	127227850	127228049	6.00341	42.6383	19.8439	26.7308	3.28451	H1	promoter	ENSG00000004059	ARF5	123.161	113.863	130.793	118.475
1301	chr3	53144050	53144249	2.00114	28.884	12.8402	17.0105	3.02314	H1	intron	ENSG00000163933	RFT1	16.9829	14.6004	14.0049	14.1077
1302	chr9	102582750	102582949	46.0262	114.161	64.201	75.3323	3.46935	H1	intergenic	ENSG00000119508	NR4A3	0.0312274	34.2863	1.86373	0.708496
1303	chr2	25517200	25517399	16.6761	62.8113	27.6259	35.3711	3.44303	H1	intron	ENSG00000119772	DNMT3A	15.5868	12.3184	15.7515	12.7739
1304	chr2	74618600	74618799	58.033	136.168	78.2085	89.9128	3.59824	H1	intron	ENSG00000204843	DCTN1	96.4778	94.4408	97.9719	107.294
1305	chr10	134350150	134350349	18.0102	81.1504	33.8514	42.9313	4.03272	H1	intergenic	ENSG00000068383	INPP5A	30.1052	32.3468	40.5485	46.1336
1306	chr17	1989650	1989849	20.6784	71.9809	32.2951	40.2313	3.54773	H1	intron	ENSG00000236838	AC090617.1	0.669576	0	0.147932	0.147809
1307	chr9	116310300	116310499	26.0148	72.8978	36.186	44.5514	3.17461	H1	intron	ENSG00000237073	RP11-168K11.2	0.996566	1.17414	0.589507	1.45157
1308	chr19	46105500	46105699	2.00114	31.6349	8.17104	13.7704	3.55214	H1	intergenic	ENSG00000125741	OPA3	7.37644	6.9521	7.69928	6.46833
1309	chr3	52040700	52040899	2.00114	23.3823	5.83646	10.5303	3.05324	H1	intergenic	ENSG00000162244	RPL29	364.995	340.641	315.788	300.708
1310	chr17	63119200	63119399	54.0307	119.662	66.5356	78.5724	3.34555	H1	intergenic	ENSG00000108370	RGS9	0.316914	0.185202	0.59146	0.331247
1311	chr10	22292200	22292399	6.00341	39.8875	15.1748	21.8707	3.30799	H1	exon	ENSG00000136770	DNAJC1	12.262	9.68158	18.0602	18.617
1312	chrX	149532800	149532999	10.0057	45.3892	19.8439	26.7308	3.12925	H1	intron	ENSG00000013619	MAMLD1	1.48055	1.76978	2.20227	2.52563
1313	chr4	183527000	183527199	46.0262	169.178	78.2085	104.493	4.77888	H1	intron	NA	NA	NA	NA	NA	NA
1314	chr11	36398600	36398799	34.0193	94.9047	50.1935	63.992	3.45754	H1	intron	ENSG00000135362	PRR5L	14.2399	10.5944	16.1685	17.8388
1315	chr4	108852800	108852999	2.00114	45.3892	10.5056	20.2506	4.17394	H1	promoter	ENSG00000245293	RP11-286E11.1	0	0.0298683	0	0
1316	chr4	26862850	26863049	10.0057	48.1401	17.5094	26.7308	3.41308	H1	promoter	ENSG00000109689	STIM2	11.1214	11.5545	11.2246	15.8052
1317	chr16	30412600	30412799	10.0057	42.6383	17.5094	25.1108	3.03705	H1	intergenic	ENSG00000180096	2013-09-01	0.158734	0.438035	0.281301	0.329992
1318	chr19	36036850	36037049	10.0057	42.6383	17.5094	25.1108	3.03705	H1	promoter	ENSG00000105677	TMEM147	83.5745	76.4756	81.3016	61.3336
1319	chr7	50515000	50515199	2.00114	28.884	8.17104	13.7704	3.32491	H1	intron	ENSG00000132436	FIGNL1	42.5	39.4788	38.0591	28.1647
1320	chr3	188003500	188003699	18.0102	64.6452	29.1823	38.0712	3.39926	H1	intron	NA	NA	NA	NA	NA	NA
1321	chr15	65425900	65426099	22.0125	100.406	36.186	65.612	4.42489	H1	exon	ENSG00000090470	PDCD7	15.5611	10.7361	18.6179	16.8809
1322	chr19	30433550	30433749	22.0125	61.8944	29.1823	44.5514	2.98992	H1	promoter	ENSG00000105176	C19orf2	13.6853	13.4594	11.7234	15.5153
1323	chr12	50052700	50052899	10.0057	56.3927	15.1748	34.8311	3.936	H1	intron	ENSG00000110844	PRPF40B	10.4217	7.69205	12.384	7.78928
1324	chr19	38469300	38469499	6.00341	39.8875	10.5056	25.1108	3.53198	H1	intron	ENSG00000105738	SIPA1L3	6.0565	5.35238	4.57058	4.46201
1325	chr3	50193550	50193749	66.0375	158.175	85.2122	112.594	3.92083	H1	promoter	ENSG00000235016	RP11-493K19.3	3.24581	4.26321	3.65493	1.53857
1326	chr2	69038700	69038899	42.0239	122.413	61.8664	83.4326	3.93592	H1	intron	NA	NA	NA	NA	NA	NA
1327	chr16	19100900	19101099	2.00114	28.884	8.17104	15.3905	3.29506	H1	intergenic	ENSG00000167186	COQ7	8.38552	9.64046	8.77732	7.87017
1328	chr16	58231500	58231699	2.00114	23.3823	5.83646	12.1504	3.01086	H1	intron	ENSG00000070770	CSNK2A2	30.4577	28.6333	31.9512	39.9107
1329	chr2	69240150	69240349	6.00341	34.3858	10.5056	20.2506	3.14944	H1	promoter	ENSG00000169604	ANTXR1	15.9386	18.8498	18.3964	24.8504
1330	chr12	56616400	56616599	82.0466	152.673	94.5506	117.454	3.1063	H1	intergenic	ENSG00000139579	OBFC2B	31.0651	31.2609	29.8016	24.5364
1331	chr5	55436600	55436799	18.0102	60.9774	37.7424	33.211	3.0778	H1	intron	ENSG00000243592	RPL17P22	6.39001	7.35836	4.09882	7.51227
1332	chr2	48010400	48010599	10.0057	48.1401	26.0695	23.4907	3.21265	H1	promoter	ENSG00000116062	MSH6	21.6959	21.9314	17.9799	20.8507
1333	chr12	52431600	52431799	14.008	133.417	66.5356	57.5118	5.16536	H1	intron	ENSG00000123358	NR4A1	2.72441	345.866	29.1242	10.0579
1334	chr15	96475550	96475749	26.0148	75.6487	47.8589	44.5514	3.11222	H1	intergenic	NA	NA	NA	NA	NA	NA
1335	chr17	62392250	62392449	2.00114	31.6349	15.1748	13.7704	3.24688	H1	intergenic	ENSG00000136478	TEX2	8.51535	7.60495	9.88336	9.21833
1336	chr4	146730100	146730299	22.0125	83.9013	50.1935	47.7915	3.66048	H1	intron	NA	NA	NA	NA	NA	NA
1337	chr12	6447700	6447899	6.00341	59.1435	26.8477	26.7308	4.0208	H1	intron	ENSG00000067182	TNFRSF1A	111.291	91.8071	122.546	110.694
1338	chr16	58663150	58663349	46.0262	111.41	73.5393	70.4722	3.27419	H1	intron	ENSG00000125107	CNOT1	46.5156	41.1017	43.1697	45.3056
1339	chr22	32029350	32029549	2.00114	28.884	12.8402	12.1504	3.14332	H1	intergenic	ENSG00000184708	EIF4ENIF1	30.644	14.6168	25.5492	21.4406
1340	chr10	112255350	112255549	6.00341	61.8944	29.1823	23.4907	4.1773	H1	intergenic	ENSG00000235874	RP11-525A16.1	0.457676	0.875629	0.404795	0.402258
1341	chr1	154297250	154297449	6.00341	39.8875	19.8439	15.3905	3.33122	H1	exon	ENSG00000143515	ATP8B2	22.7858	21.5119	24.7847	29.615
1342	chr3	196696050	196696249	10.0057	45.3892	24.5131	20.2506	3.14249	H1	intergenic	ENSG00000119227	PIGZ	2.56648	2.70296	2.59835	2.29735
1343	chr5	55421800	55421999	30.0171	83.9013	52.5281	46.1714	3.2621	H1	intron	ENSG00000243592	RPL17P22	6.39001	7.35836	4.09882	7.51227
1344	chr17	75400600	75400799	82.0466	160.925	117.896	106.113	3.223	H1	intron	NA	NA	NA	NA	NA	NA
1345	chr22	24181100	24181299	6.00341	42.6383	22.1785	17.0105	3.42344	H1	exon	ENSG00000099958	DERL3	2.37639	3.00653	10.4479	5.52365
1346	chr16	67207700	67207899	26.0148	78.3995	50.1935	41.3113	3.30593	H1	promoter	ENSG00000140939	NOL3	3.8166	3.08204	3.04011	4.13723
1347	chr10	119135250	119135449	26.0148	78.3995	50.1935	41.3113	3.30593	H1	intergenic	ENSG00000165650	PDZD8	7.26736	7.13053	10.2694	9.09983
1348	chr16	15583900	15584099	14.008	81.1504	45.5244	34.8311	4.16784	H1	intron	ENSG00000166780	C16orf45	7.28816	7.90568	5.51369	6.73854
1349	chr16	4663800	4663999	14.008	56.3927	33.8514	26.7308	3.27006	H1	intron	ENSG00000153443	FAM100A	8.06927	8.46232	7.60863	7.19035
1350	chr2	239079600	239079799	30.0171	83.9013	59.5318	54.2717	3.10118	H1	promoter	ENSG00000178752	FAM132B	0.466763	0.0937258	0.687873	0.299009
1351	chr16	88869600	88869799	18.0102	72.8978	47.8589	42.9313	3.47804	H1	promoter	ENSG00000167513	CDT1	5.57951	4.77768	3.58814	3.17477
1352	chr7	66386450	66386649	22.0125	89.403	59.5318	54.2717	3.75846	H1	promoter	ENSG00000106609	C7orf42	58.6789	52.9953	53.924	62.4675
1353	chr13	45916250	45916449	38.0216	114.161	80.5431	75.3323	3.65754	H1	promoter	ENSG00000170919	XXyac-R12DG2.2	15.3783	19.2486	22.0303	16.1564
1354	chr1	156783250	156783449	6.00341	37.1366	22.1785	18.6306	2.96696	H1	intron	ENSG00000198400	NTRK1	0	0.0197289	0.29587	0
1355	chr7	14030350	14030549	42.0239	108.659	74.3175	69.3922	3.34556	H1	intron	ENSG00000006468	ETV1	8.80222	7.78056	8.75982	10.457
1356	chr21	46962200	46962399	2.00114	28.884	17.5094	13.7704	2.98204	H1	intron	ENSG00000173638	SLC19A1	30.0658	29.0916	26.2233	36.1067
1357	chr13	111568400	111568599	14.008	64.6452	43.1898	36.4511	3.45842	H1	intergenic	ENSG00000088448	ANKRD10	40.6604	48.7559	57.2816	42.3001
1358	chr17	1691500	1691699	14.008	59.1435	38.5206	31.591	3.2817	H1	intron	ENSG00000132386	SERPINF1	0.0548423	0.0853581	0.193075	0.0974054
1359	chr16	77224250	77224449	42.0239	114.161	82.8777	70.4722	3.52954	H1	promoter	ENSG00000103111	MON1B	17.6126	22.4002	22.3764	17.644
1360	chr8	10487500	10487699	18.0102	64.6452	38.5206	42.9313	3.15655	H1	intron	ENSG00000253649	RP11-981G7.4	0.0393737	0.0407602	0.162558	0
1361	chr9	71746300	71746499	18.0102	67.3961	40.8552	44.5514	3.25888	H1	intron	ENSG00000119139	TJP2	40.8772	40.2171	43.3943	39.6548
1362	chr14	105766550	105766749	22.0125	81.1504	47.8589	47.7915	3.56338	H1	promoter	ENSG00000179364	PACS2	21.1135	20.5523	19.6126	22.3099
1363	chr6	30659300	30659499	6.00341	37.1366	19.8439	20.2506	2.96382	H1	intergenic	ENSG00000137404	NRM	28.0388	26.7849	29.004	17.9487
1364	chr12	30907350	30907549	18.0102	70.147	40.8552	41.3113	3.42096	H1	exon	ENSG00000110888	CAPRIN2	17.6248	13.0522	11.3673	9.97112
1365	chr9	133455100	133455299	18.0102	89.403	47.8589	49.4115	4.06836	H1	promoter	ENSG00000107164	FUBP3	46.419	47.5989	53.6079	34.457
1366	chr15	101724850	101725049	30.0171	111.41	64.201	63.992	4.05287	H1	intron	ENSG00000131873	CHSY1	29.4711	41.4662	39.4012	52.9877
1367	chr3	183146300	183146499	2.00114	28.884	15.1748	13.7704	3.01714	H1	intergenic	ENSG00000053524	MCF2L2	1.4989	1.53429	2.07389	1.97931
1368	chr5	149995450	149995649	10.0057	81.1504	45.5244	42.9313	4.23462	H1	intron	ENSG00000171992	SYNPO	51.7668	59.2121	57.072	49.4941
1369	chr8	26308350	26308549	26.0148	86.6521	54.8627	54.2717	3.46877	H1	intergenic	ENSG00000092964	DPYSL2	91.8566	83.9652	79.3308	108.536
1370	chr13	31019350	31019549	10.0057	50.8909	29.1823	29.9709	3.21641	H1	intergenic	ENSG00000224117	PTPN2P2	1.2745	1.47738	1.046	1.09115
1371	chr10	33284000	33284199	2.00114	37.1366	12.8402	17.0105	3.64551	H1	intergenic	ENSG00000150093	ITGB1	722.713	691.592	754.725	807.149
1372	chr10	30046750	30046949	30.0171	100.406	52.5281	60.7519	3.82179	H1	intergenic	ENSG00000197321	SVIL	42.0175	45.1684	45.5686	42.8327
1373	chr17	20059850	20060049	2.00114	28.884	10.5056	13.7704	3.19015	H1	intron	NA	NA	NA	NA	NA	NA
1374	chr16	89367400	89367599	6.00341	48.1401	22.1785	23.4907	3.59815	H1	intron	ENSG00000170100	ZNF778	2.33454	2.01205	2.73362	2.29979
1375	chr8	22457800	22457999	70.0398	171.929	108.558	112.594	3.93352	H1	promoter	ENSG00000158941	KIAA1967	164.807	181.9	164.028	136.93
1376	chr15	31528150	31528349	2.00114	53.6418	19.8439	21.8707	4.24437	H1	intergenic	NA	NA	NA	NA	NA	NA
1377	chr3	58036100	58036299	170.097	331.479	222.953	235.717	4.23525	H1	intron	ENSG00000136068	FLNB	311.583	320.469	308.696	246.407
1378	chr9	128230400	128230599	6.00341	39.8875	17.5094	20.2506	3.2439	H1	intron	ENSG00000214761	HNRNPA1P15	0.841106	0.792009	1.07549	0.877195
1379	chr13	95844400	95844599	2.00114	26.1332	10.5056	12.1504	2.97754	H1	intron	NA	NA	NA	NA	NA	NA
1380	chr3	123752500	123752699	18.0102	72.8978	31.5169	38.0712	3.76939	H1	intergenic	ENSG00000065371	ROPN1	0.0468087	0	0	0
1381	chr21	45527500	45527699	18.0102	92.1538	36.186	44.5514	4.38915	H1	promoter	NA	NA	NA	NA	NA	NA
1382	chr12	125179100	125179299	26.0148	79.3165	41.6334	46.7115	3.37362	H1	intergenic	ENSG00000246139	RP11-592O2.1	0.0992929	0.0501808	0.0850889	0.00918637
1383	chr20	62185300	62185499	10.0057	42.6383	19.8439	21.8707	2.99543	H1	promoter	ENSG00000125531	C20orf195	0.431179	0.163717	0.705174	0.0701209
1384	chr19	2495150	2495349	24.6807	82.9843	41.6334	45.0914	3.63819	H1	intergenic	ENSG00000099860	GADD45B	19.3123	26.3223	18.3172	22.4514
1385	chr12	51158500	51158699	30.0171	116.912	52.5281	59.1318	4.40478	H1	promoter	ENSG00000123268	ATF1	18.2666	13.063	19.4629	18.2037
1386	chr2	68479300	68479499	18.0102	81.1504	33.8514	38.0712	4.0917	H1	exon	ENSG00000221823	PPP3R1	32.1643	35.4501	39.0698	39.7956
1387	chr22	41843700	41843899	62.0353	163.676	87.5468	94.773	4.20966	H1	intergenic	ENSG00000183864	TOB2	16.7766	9.78277	20.4892	20.5288
1388	chr21	43641400	43641599	46.0262	144.42	71.2048	75.3323	4.39875	H1	intron	NA	NA	NA	NA	NA	NA
1389	chr10	64576800	64576999	2.00114	34.3858	10.5056	12.1504	3.69341	H1	intron	ENSG00000238280	RP11-436D10.3	0	0.306894	0	0
1390	chr17	41719200	41719399	10.0057	72.8978	26.8477	29.9709	4.36055	H1	exon	ENSG00000005102	MEOX1	0	0	0.0337259	0.102236
1391	chr16	1599400	1599599	30.0171	89.403	47.8589	49.4115	3.53758	H1	intron	ENSG00000100726	TELO2	6.6418	6.31264	6.4559	5.08123
1392	chr15	75939400	75939599	11.3398	64.6452	26.8477	26.7308	3.99208	H1	intergenic	ENSG00000173548	SNX33	2.87008	4.65621	3.45971	3.21658
1393	chr5	55290150	55290349	254.144	397.499	297.659	297.279	3.56685	H1	intron	ENSG00000134352	IL6ST	219.295	235.431	391.506	294.772
1394	chrX	63425000	63425199	6.00341	48.1401	15.1748	17.0105	3.96337	H1	intron	ENSG00000184675	FAM123B	0.544969	0.650055	1.13758	0.922044
1395	chr21	30670900	30671099	6.00341	37.1366	12.8402	13.7704	3.40302	H1	promoter	NA	NA	NA	NA	NA	NA
1396	chr11	67141200	67141399	26.0148	81.1504	38.5206	39.6912	3.63746	H1	intron	ENSG00000175482	POLD4	54.0741	47.7161	42.346	53.1946
1397	chr15	91073000	91073199	2.00114	34.3858	10.5056	10.5303	3.75957	H1	promoter	ENSG00000140577	CRTC3	11.9869	10.5647	10.7431	11.598
1398	chr4	126239300	126239499	6.00341	34.3858	12.8402	13.7704	3.16489	H1	exon	ENSG00000196159	FAT4	9.76123	9.7216	7.86414	6.79686
1399	chr17	42312700	42312899	6.00341	34.3858	12.8402	13.7704	3.16489	H1	intergenic	ENSG00000214921	AC003102.1	0	0.0308243	0	0
1400	chr5	55654600	55654799	2.00114	23.3823	8.17104	7.29023	3.04924	H1	intergenic	ENSG00000250787	HMGN1P17	0	0.292548	0	0
1401	chr3	123303300	123303499	6.00341	48.1401	17.5094	15.3905	3.94122	H1	promoter	ENSG00000206527	PTPLB	13.9154	11.2313	13.0665	15.3381
1402	chr15	73977450	73977649	26.0148	136.168	57.1973	51.0316	5.07022	H1	promoter	ENSG00000103855	CD276	70.8843	77.4323	93.4793	79.1108
1403	chr6	157744900	157745099	218.124	361.738	253.302	253.538	3.8368	H1	exon	ENSG00000215712	C6orf35	23.3422	23.0859	16.378	21.364
1404	chr1	204167100	204167299	42.0239	103.157	57.1973	55.8917	3.45689	H1	promoter	ENSG00000170498	KISS1	1.73848	4.15101	1.96314	2.4578
1405	chr1	144923200	144923399	22.0125	70.147	33.8514	33.211	3.46223	H1	intron	ENSG00000222788	U2	0	44.2922	0	0
1406	chr8	23180450	23180649	38.0216	133.417	61.8664	60.7519	4.54449	H1	intron	ENSG00000253837	RP11-177H13.2	0.696575	2.71032	1.12623	1.18713
1407	chr1	9472400	9472599	2.00114	26.1332	8.17104	7.29023	3.34274	H1	intergenic	NA	NA	NA	NA	NA	NA
1408	chr22	40794100	40794299	6.00341	31.6349	12.8402	12.1504	2.97265	H1	intron	ENSG00000172912	COX6B1P3	0	0.397337	0	0
1409	chr19	49047150	49047349	6.00341	31.6349	12.8402	12.1504	2.97265	H1	intergenic	ENSG00000088002	SULT2B1	0.0364689	0	0	0.0647024
1410	chr19	41115600	41115799	2.00114	45.3892	17.5094	17.0105	3.99982	H1	intron	ENSG00000090006	LTBP4	3.1884	2.45068	2.46892	1.98942
1411	chr1	156101100	156101299	10.0057	42.6383	22.1785	20.2506	2.97436	H1	intron	ENSG00000196189	SEMA4A	0.350388	0.476643	1.29146	0.810168
1412	chr5	172305450	172305649	162.092	309.472	215.949	208.176	4.09165	H1	intron	ENSG00000113719	ERGIC1	157.466	156.364	165.849	152.004
1413	chr10	5931700	5931899	14.008	50.8909	26.8477	25.1108	3.04538	H1	promoter	ENSG00000134452	FBXO18	60.4187	68.9757	61.6551	70.0562
1414	chr12	3862400	3862599	50.0284	122.413	75.8739	72.0922	3.53043	H1	intergenic	ENSG00000130038	EFCAB4B	4.58673	4.60983	4.29893	3.43212
1415	chr10	112221000	112221199	2.00114	59.1435	22.1785	17.0105	4.55305	H1	intergenic	ENSG00000237642	HMGB3P5	0.423758	0.0465916	0.149667	0.299009
1416	chr22	43356450	43356649	66.0375	185.683	108.558	96.393	4.50528	H1	intron	ENSG00000100266	PACSIN2	67.5794	61.0809	79.3304	47.3888
1417	chr11	59436000	59436199	50.0284	136.168	80.5431	73.7123	3.96531	H1	intron	ENSG00000166889	PATL1	17.9255	17.6569	20.279	18.2005
1418	chr7	99516750	99516949	22.0125	92.1538	47.8589	41.3113	4.11229	H1	exon	ENSG00000146833	TRIM4	10.1377	7.28264	8.03117	11.4132
1419	chr21	44495550	44495749	6.00341	64.6452	24.5131	21.8707	4.41319	H1	intron	NA	NA	NA	NA	NA	NA
1420	chr2	224809550	224809749	34.0193	130.666	66.5356	57.5118	4.56446	H1	intron	ENSG00000085449	WDFY1	40.827	35.0321	63.2335	33.5045
1421	chr12	95334800	95334999	14.008	122.413	50.1935	39.6912	5.253	H1	intergenic	ENSG00000184752	NDUFA12	274.738	308.84	246.746	223.916
1422	chr2	101679250	101679449	6.00341	48.1401	19.8439	17.0105	3.82389	H1	intron	NA	NA	NA	NA	NA	NA
1423	chr5	138609600	138609799	18.0102	136.168	57.1973	47.7915	5.29471	H1	promoter	ENSG00000120725	SIL1	68.8811	67.8914	83.9424	60.9912
1424	chr19	4343300	4343499	50.0284	105.908	68.8702	63.992	2.97775	H1	promoter	ENSG00000008382	MPND	5.69168	4.71741	4.84099	4.4164
1425	chr1	21912900	21913099	30.0171	103.157	31.5169	23.4907	4.90702	H1	intergenic	ENSG00000162551	ALPL	0.298766	0.546827	0.448675	0.747779
1426	chr6	41755450	41755649	75.3762	126.998	76.6521	70.4722	3.0121	H1	promoter	ENSG00000137218	FRS3	2.00612	1.94453	1.55089	1.73198
1427	chr1	107599550	107599749	70.0398	125.164	71.2048	63.992	3.30292	H1	promoter	ENSG00000198890	PRMT6	6.17995	4.31631	6.72928	4.90699
1428	chr4	140098800	140098999	26.0148	61.8944	26.8477	21.8707	3.34335	H1	intergenic	ENSG00000109381	ELF2	16.4845	15.0141	14.2876	16.7039
1429	chr3	50193150	50193349	15.6089	40.9878	16.1086	12.4744	3.03834	H1	promoter	ENSG00000235016	RP11-493K19.3	3.24581	4.26321	3.65493	1.53857
1430	chr12	118498350	118498549	38.0216	87.5691	38.5206	32.131	3.76611	H1	intron	ENSG00000176871	WSB2	39.6996	41.6815	40.6005	38.7383
1431	chr15	75198800	75198999	66.0375	122.413	66.5356	59.1318	3.46526	H1	intron	ENSG00000178761	C15orf17	14.9799	8.92455	14.6499	14.4067
1432	chr8	41347250	41347449	22.0125	64.6452	22.1785	17.0105	3.97619	H1	promoter	ENSG00000147533	GOLGA7	39.7814	38.0104	34.8774	47.1362
1433	chr6	44031900	44032099	38.0216	138.918	38.5206	26.7308	5.51013	H1	intergenic	ENSG00000237686	RP5-1120P11.1	0.00278749	0.0283958	0.0320408	0
1434	chr3	129322500	129322699	106.06	174.68	108.558	98.0131	3.37248	H1	intron	ENSG00000004399	PLXND1	368.368	370.156	426.614	506.071
1435	chr7	150737250	150737449	42.0239	119.662	45.5244	33.211	4.7374	H1	intron	ENSG00000243433	RP11-148K1.10	2.64704	0.600832	2.93874	1.18187
1436	chr3	115503300	115503499	66.0375	125.164	68.8702	59.1318	3.54479	H1	intergenic	ENSG00000243014	PTMAP8	44.1033	38.2557	42.7968	30.6106
1437	chr16	22217800	22217999	34.0193	89.403	36.186	28.3509	4.10824	H1	promoter	ENSG00000103319	EEF2K	14.8304	12.3108	12.3027	13.6884
1438	chr9	131533900	131534099	46.0262	94.9047	47.8589	41.3113	3.44986	H1	exon	ENSG00000160445	ZER1	7.29986	7.72853	6.98215	8.66388
1439	chr1	120190050	120190249	32.8758	83.1153	35.519	27.888	3.88104	H1	intron	ENSG00000143067	ZNF697	4.21093	6.20165	6.12949	4.65453
1440	chr21	33104300	33104499	18.0102	48.1401	19.8439	15.3905	3.20825	H1	exon	ENSG00000156304	SCAF4	13.017	10.983	11.1601	12.031
1441	chr20	61201250	61201449	38.0216	81.1504	40.8552	33.211	3.34033	H1	intergenic	ENSG00000174407	C20orf166	0	0.00828964	0	0
1442	chr11	19761850	19762049	10.0057	50.8909	12.8402	5.67018	4.45992	H1	intron	NA	NA	NA	NA	NA	NA
1443	chr3	184053750	184053949	62.0353	174.68	68.8702	47.7915	5.26197	H1	promoter	NA	NA	NA	NA	NA	NA
1444	chr13	111268450	111268649	54.0307	133.417	59.5318	44.5514	4.51544	H1	promoter	ENSG00000153487	ING1	4.11559	3.79805	4.253	4.17013
1445	chr5	149980650	149980849	14.008	50.8909	15.1748	8.91028	4.064	H1	promoter	ENSG00000171992	SYNPO	51.7668	59.2121	57.072	49.4941
1446	chr11	46867650	46867849	50.0284	100.406	52.5281	42.9313	3.48897	H1	intron	ENSG00000175216	CKAP5	59.4796	57.1754	54.5103	49.7407
1447	chr17	1395800	1395999	22.0125	55.4757	23.7349	17.5505	3.34741	H1	exon	ENSG00000197879	MYO1C	50.2426	48.3406	47.257	48.1362
1448	chr7	148936800	148936999	42.0239	92.1538	45.5244	41.3113	3.46128	H1	promoter	ENSG00000170260	ZNF212	3.70202	2.99938	3.08934	3.51751
1449	chr1	25070800	25070999	14.008	56.3927	17.5094	13.7704	4.07787	H1	promoter	ENSG00000169504	CLIC4	204.028	192.396	223.257	152.904
1450	chr19	3608200	3608399	38.0216	78.3995	41.3221	37.4232	3.00818	H1	promoter	ENSG00000006638	TBXA2R	2.32303	2.42188	4.39627	4.36041
1451	chr19	48234400	48234599	10.0057	42.6383	12.8402	8.91028	3.80297	H1	intron	ENSG00000105373	GLTSCR2	70.2459	71.1836	64.0061	60.8122
1452	chrX	153608400	153608599	50.0284	127.915	57.1973	47.7915	4.37663	H1	promoter	ENSG00000102119	EMD	68.9113	73.7926	81.1576	64.0984
1453	chr19	2168200	2168399	36.6875	81.1504	40.077	34.8311	3.33917	H1	intron	ENSG00000104885	DOT1L	5.39449	5.90751	8.45926	5.70196
1454	chr22	35796350	35796549	34.0193	86.6521	38.5206	31.591	3.83938	H1	promoter	ENSG00000100297	MCM5	52.9645	50.6067	43.8326	36.0293
1455	chr1	26132200	26132399	36.6875	82.0674	40.077	34.2911	3.40939	H1	intron	ENSG00000117640	FAM54B	27.2427	29.682	26.8423	23.3443
1456	chr1	155178550	155178749	42.0239	114.161	50.1935	39.6912	4.34707	H1	promoter	ENSG00000169231	THBS3	6.19652	6.2757	7.92814	6.50029
1457	chr2	56411800	56411999	18.0102	56.3927	22.1785	17.0105	3.63712	H1	promoter	ENSG00000055813	CCDC85A	2.30792	2.22654	1.61196	1.51367
1458	chr11	65380850	65381049	50.0284	136.168	59.5318	47.7915	4.59876	H1	exon	ENSG00000173327	MAP3K11	155.743	174.854	163.132	151.414
1459	chr6	44032850	44033049	9.20523	42.6383	12.8402	9.23429	3.82729	H1	intergenic	ENSG00000237686	RP5-1120P11.1	0.00278749	0.0283958	0.0320408	0
1460	chr5	172325650	172325849	39.3557	124.247	47.8589	38.0712	4.78495	H1	intron	ENSG00000037241	RPL26L1	48.1511	33.5581	57.0877	45.7169
1461	chr22	39686650	39686849	18.0102	59.1435	22.1785	17.0105	3.80506	H1	intergenic	ENSG00000224794	RP3-333H23.8	0.093396	0.0727396	0.0821823	0.165961
1462	chr21	18884950	18885149	6.00341	26.1332	8.17104	5.67018	3.06915	H1	promoter	ENSG00000154639	CXADR	12.3782	12.6725	10.5527	9.17428
1463	chr19	9880050	9880249	6.00341	26.1332	8.17104	5.67018	3.06915	H1	intergenic	ENSG00000196605	ZNF846	1.01386	0.735599	0.673146	0.918253
1464	chr1	151300400	151300599	130.074	210.441	134.238	125.554	3.44292	H1	intergenic	ENSG00000143393	PI4KB	32.5918	29.242	29.1348	25.8548
1465	chr16	65156200	65156399	42.0239	108.659	45.5244	38.0712	4.26281	H1	intergenic	ENSG00000140937	CDH11	15.1054	14.5358	20.1822	9.62689
1466	chr12	6643700	6643899	86.0489	158.175	89.8814	81.8125	3.66206	H1	promoter	ENSG00000111640	GAPDH	3307.9	2636.57	3310.01	2068.22
1467	chr7	1067300	1067499	30.0171	72.8978	31.5169	26.7308	3.56408	H1	intron	ENSG00000164849	GPR146	14.8843	10.9967	4.35678	13.651
1468	chr17	58654100	58654299	14.008	39.8875	15.1748	12.1504	3.08233	H1	intergenic	ENSG00000170836	PPM1D	9.87791	9.46831	7.72989	8.92008
1469	chr2	10302800	10302999	14.008	44.4723	16.7312	12.1504	3.40396	H1	intron	ENSG00000163009	C2orf48	0.108707	0.135505	0.114776	0.0772822
1470	chr12	117925750	117925949	2.00114	20.6315	3.50187	0.810025	3.69146	H1	intron	ENSG00000089250	NOS1	0.00313422	0.233267	0.00941982	0
1471	chr6	109057750	109057949	2.00114	20.6315	3.50187	0.810025	3.69146	H1	intergenic	ENSG00000219565	ZNF259P1	3.95757	4.72207	4.36896	4.12639
1472	chr14	23427100	23427299	2.00114	20.6315	3.50187	0.810025	3.69146	H1	promoter	ENSG00000092036	HAUS4	28.0308	25.0873	22.559	23.967
1473	chr10	115897500	115897699	2.00114	20.6315	3.50187	0.810025	3.69146	H1	intron	ENSG00000165813	C10orf118	4.25948	4.49774	4.35752	5.05834
1474	chr17	73873000	73873199	29.2166	74.5483	31.5169	25.4348	3.72496	H1	intron	ENSG00000132481	TRIM47	18.8032	13.9271	18.705	18.2659
1475	chr17	27620700	27620899	34.0193	108.659	38.5206	28.3509	4.76523	H1	intron	ENSG00000108256	NUFIP2	7.28365	5.6313	8.51753	9.77389
1476	chr15	75495450	75495649	28.683	78.3995	31.5169	24.5708	3.96425	H1	intron	ENSG00000167173	C15orf39	6.73613	8.32041	7.62246	6.6318
1477	chr1	112163150	112163349	27.3489	74.7317	30.7387	24.0307	3.85706	H1	promoter	NA	NA	NA	NA	NA	NA
1478	chr7	108096500	108096699	12.6739	51.8079	15.1748	9.99031	4.11574	H1	intron	ENSG00000091129	NRCAM	34.8236	29.6411	46.858	27.3758
1479	chr16	1756800	1756999	14.008	45.3892	17.5094	12.1504	3.44584	H1	promoter	ENSG00000138834	MAPK8IP3	6.25672	5.99218	6.31882	5.09844
1480	chr8	42065500	42065699	50.0284	144.42	59.5318	44.5514	4.88342	H1	intergenic	ENSG00000104368	PLAT	59.8932	59.3976	89.5728	80.1603
1481	chr22	32027400	32027599	18.0102	50.8909	21.4003	15.9305	3.33627	H1	intergenic	ENSG00000184708	EIF4ENIF1	30.644	14.6168	25.5492	21.4406
1482	chr7	66094100	66094299	26.0148	81.1504	31.5169	23.4907	4.19795	H1	promoter	ENSG00000154710	RABGEF1	3.73671	3.68003	2.18058	1.85414
1483	chr10	103113900	103114099	38.0216	108.659	45.5244	34.8311	4.42263	H1	promoter	ENSG00000166167	BTRC	79.319	79.6404	83.8678	45.1634
1484	chr1	24345800	24345999	94.0535	180.181	103.889	89.9128	3.94972	H1	intergenic	ENSG00000215905	RP11-4M23.7	0	0.0590637	0	0.820867
1485	chr4	71571000	71571199	30.0171	105.908	38.5206	26.7308	4.79818	H1	promoter	ENSG00000018189	RUFY3	14.0799	18.4536	19.538	24.6596
1486	chr17	80056950	80057149	58.033	111.41	64.201	55.8917	3.25141	H1	intergenic	ENSG00000169710	FASN	30.4078	29.5332	34.7908	33.8562
1487	chr14	105948550	105948749	114.065	251.704	124.9	101.253	5.04192	H1	intergenic	ENSG00000185347	C14orf80	6.2517	5.51091	5.3793	3.74168
1488	chr1	168149350	168149549	30.0171	83.9013	33.8514	25.1108	4.1139	H1	intron	ENSG00000143155	TIPRL	29.2785	27.1652	30.0495	28.544
1489	chr14	77496000	77496199	26.0148	70.147	29.1823	21.8707	3.77288	H1	intergenic	ENSG00000119669	IRF2BPL	6.27174	9.70722	8.1886	9.73418
1490	chr11	60673700	60673899	66.0375	122.413	71.2048	60.7519	3.34491	H1	intron	ENSG00000110107	PRPF19	139.813	135.233	137.638	98.8681
1491	chr19	1266950	1267149	10.0057	39.8875	12.8402	7.29023	3.70168	H1	promoter	ENSG00000099622	CIRBP	134.039	151.672	157.734	109.22
1492	chr2	110392000	110392199	6.00341	31.6349	8.17104	4.05013	3.73665	H1	intergenic	ENSG00000198142	ANKRD57	1.33236	1.93744	1.73869	1.41711
1493	chr4	1723300	1723499	6.00341	31.6349	8.17104	4.05013	3.73665	H1	promoter	ENSG00000013810	TACC3	86.707	72.0855	58.0895	42.1605
1494	chr5	169133100	169133299	2.00114	17.8806	3.50187	0.810025	3.39066	H1	intron	ENSG00000134516	DOCK2	0.694983	1.29332	1.01645	0.0599661
1495	chr12	50444850	50445049	2.00114	17.8806	3.50187	0.810025	3.39066	H1	intergenic	ENSG00000110881	ACCN2	0.457731	0.287884	0.84198	0.353133
1496	chr10	13895550	13895749	114.065	188.434	122.566	101.253	3.52377	H1	intron	NA	NA	NA	NA	NA	NA
1497	chr10	81026100	81026299	238.135	358.987	253.302	217.897	3.8918	H1	intron	ENSG00000224596	RP11-202P11.1	0.0694879	0.173479	0.195876	0.359751
1498	chr6	52400200	52400399	34.0193	70.147	38.5206	28.3509	3.03584	H1	intron	ENSG00000065308	TRAM2	71.7154	75.0617	59.1266	57.1063
1499	chr20	32273450	32273649	42.0239	94.9047	47.8589	31.591	3.86003	H1	intron	ENSG00000101412	E2F1	11.0428	11.2324	8.21216	7.98756
1500	chr8	71520000	71520199	30.0171	64.6452	33.8514	23.4907	3.13491	H1	promoter	ENSG00000067167	TRAM1	74.2893	89.3335	109.618	99.6529
1501	chr17	79790750	79790949	30.0171	64.6452	33.8514	23.4907	3.13491	H1	intron	ENSG00000215621	AC174470.1	0.482458	0.874331	0.871321	0.884572
1502	chr17	79980050	79980249	34.0193	81.1504	38.5206	25.1108	3.7975	H1	intron	ENSG00000169689	STRA13	42.6447	42.1101	39.8311	31.2289
1503	chr9	131465850	131466049	138.078	301.219	155.25	107.733	5.39793	H1	intron	ENSG00000160447	PKN3	12.281	12.1608	15.1518	10.6196
1504	chr18	268350	268549	67.3716	126.081	73.5393	56.9718	3.55263	H1	intergenic	ENSG00000079134	THOC1	16.292	12.4325	13.4315	12.7813
1505	chr16	16213700	16213899	40.6898	96.7386	43.1898	28.8909	4.12442	H1	intron	ENSG00000241067	RP11-517A5.1	0.385222	0	0.340475	0.169786
1506	chr15	57025400	57025599	62.0353	111.41	64.201	51.0316	3.31373	H1	intron	NA	NA	NA	NA	NA	NA
1507	chr9	140472750	140472949	6.00341	23.3823	6.61465	1.89006	3.25437	H1	intron	ENSG00000148399	WDR85	17.2298	11.6647	14.7476	13.7609
1508	chr5	131826850	131827049	94.0535	174.68	99.2197	76.9524	4.07919	H1	intergenic	ENSG00000125347	IRF1	7.71684	7.66144	8.96482	10.621
1509	chr9	130830950	130831149	26.0148	60.0605	28.4041	18.6306	3.33635	H1	promoter	ENSG00000148339	SLC25A25	9.82731	22.8866	15.9582	11.5889
1510	chr1	21623250	21623449	26.0148	61.8944	29.1823	18.6306	3.43548	H1	intron	ENSG00000117298	ECE1	289.012	300.854	312.91	373.891
1511	chr17	80240400	80240599	14.008	56.3927	17.5094	5.67018	4.44223	H1	intergenic	ENSG00000141551	CSNK1D	41.4269	42.107	42.4931	36.3709
1512	chr22	21356500	21356699	38.0216	74.7317	40.8552	30.511	3.06489	H1	promoter	ENSG00000230513	AC002472.9	0.89594	0.833791	0.864856	0.326831
1513	chr1	147806350	147806549	58.033	119.662	68.8702	49.4115	3.74239	H1	promoter	ENSG00000202408	U1	0	0	3.93006	0
1514	chr7	651050	651249	106.06	251.704	131.904	89.9128	5.21167	H1	intron	ENSG00000164818	HEATR2	14.7847	16.4392	13.7155	9.77247
1515	chr16	2084150	2084349	62.0353	130.666	73.5393	54.2717	3.90193	H1	promoter	ENSG00000103197	TSC2	44.7931	40.6237	44.7521	41.0277
1516	chr1	2518600	2518799	42.0239	83.9013	47.8589	34.8311	3.19117	H1	promoter	ENSG00000157870	C1orf93	20.5478	16.6313	17.5911	19.1664
1517	chr22	18574550	18574749	59.3671	108.659	66.5356	51.0316	3.20234	H1	intergenic	ENSG00000183785	TUBA8	0.695068	0.256794	0.365404	0.732371
1518	chr16	3073100	3073299	86.0489	240.7	108.558	60.7519	5.69684	H1	promoter	ENSG00000131652	THOC6	9.49353	10.3037	11.2727	9.56606
1519	chr12	54816700	54816899	30.0171	72.8978	36.186	23.4907	3.58892	H1	intergenic	ENSG00000094916	CBX5	58.8328	55.1433	50.3114	42.7779
1520	chr1	11865400	11865599	98.0557	169.178	108.558	88.2927	3.51279	H1	intron	ENSG00000175206	NPPA	0.473705	0.2385	0.779557	0.237192
1521	chr11	74660650	74660849	38.8221	78.3995	44.5905	33.535	3.06538	H1	promoter	ENSG00000118363	SPCS2	233.452	223.707	241.652	197.303
1522	chr1	36554700	36554899	38.0216	100.406	47.8589	26.7308	4.31863	H1	promoter	ENSG00000116863	ADPRHL2	14.35	14.8513	14.4276	12.9612
1523	chr7	39990800	39990999	14.008	50.8909	19.8439	7.29023	4.01446	H1	promoter	ENSG00000065883	CDK13	13.4099	15.1264	12.2764	17.2585
1524	chr19	54511200	54511399	18.0102	51.8079	23.7349	12.6904	3.51496	H1	intron	ENSG00000130433	CACNG6	1.49508	1.62868	1.8535	2.97622
1525	chr15	51386700	51386899	50.0284	92.1538	57.1973	42.9313	2.97729	H1	intron	NA	NA	NA	NA	NA	NA
1526	chr1	226374500	226374699	86.0489	149.922	96.8852	75.3323	3.42506	H1	intergenic	NA	NA	NA	NA	NA	NA
1527	chr7	44298600	44298799	118.067	243.451	136.573	91.5329	4.91319	H1	intron	ENSG00000106636	YKT6	53.7541	52.6748	55.9703	56.6733
1528	chr3	53289500	53289699	42.0239	89.403	50.1935	33.211	3.51592	H1	intron	ENSG00000163931	TKT	268.75	224.467	296.104	174.623
1529	chr7	20369900	20370099	47.3602	96.7386	55.6409	37.5312	3.51296	H1	promoter	ENSG00000105855	ITGB8	1.53191	2.50657	3.00367	0.923137
1530	chr20	35807750	35807949	27.3489	60.0605	31.5169	20.7906	3.10339	H1	exon	ENSG00000101353	C20orf132	0.434934	1.32423	0.987319	0.70627
1531	chr17	61818650	61818849	78.0444	160.925	87.5468	60.7519	4.3318	H1	intron	ENSG00000125695	STRADA	20.2602	18.2039	17.2417	18.1055
1532	chr6	36791650	36791849	342.194	493.78	360.693	310.24	4.11413	H1	intron	NA	NA	NA	NA	NA	NA
1533	chr8	37005350	37005549	106.06	188.434	115.562	88.2927	3.96043	H1	intergenic	ENSG00000253650	SMARCE1P4	2.01197	1.61266	1.60246	1.51727
1534	chr12	69081100	69081299	66.0375	141.669	75.8739	47.7915	4.33624	H1	promoter	ENSG00000111581	NUP107	66.3892	52.5364	54.1355	38.5493
1535	chr19	41857200	41857399	46.0262	119.662	54.8627	28.3509	4.67329	H1	intron	ENSG00000142046	TMEM91	11.7376	10.2667	12.3908	11.0166
1536	chr20	354850	355049	42.0239	92.1538	47.8589	29.9709	3.79707	H1	intergenic	ENSG00000101255	TRIB3	12.8471	16.7578	19.3211	11.6768
1537	chr1	210485050	210485249	26.0148	94.9047	38.5206	21.8707	4.65563	H1	intergenic	ENSG00000233455	RP4-667H12.4	0	0.0566701	0.0968005	0.0972017
1538	chr10	13730400	13730599	2.00114	23.3823	5.83646	0.810025	3.77554	H1	intron	NA	NA	NA	NA	NA	NA
1539	chr19	30097100	30097299	42.0239	97.6556	52.5281	39.6912	3.65634	H1	promoter	ENSG00000105171	POP4	24.6369	20.1318	17.8806	16.5856
1540	chr7	44298550	44298749	36.6875	86.6521	45.5244	34.2911	3.55024	H1	intron	ENSG00000106636	YKT6	53.7541	52.6748	55.9703	56.6733
1541	chr20	10015650	10015849	22.0125	61.8944	29.1823	20.2506	3.50109	H1	intron	ENSG00000132623	ANKRD5	1.12035	0.950072	0.745115	1.24444
1542	chr1	38412250	38412449	52.4298	109.759	61.8664	51.0316	3.48462	H1	intron	ENSG00000204084	INPP5B	12.0969	13.0942	9.75496	8.24639
1543	chrX	69654600	69654799	26.0148	72.8978	33.8514	25.1108	3.69757	H1	intergenic	ENSG00000082458	DLG3	1.47175	1.1477	1.85458	1.3593
1544	chr12	133337350	133337549	58.033	138.918	71.2048	54.2717	4.27812	H1	intron	NA	NA	NA	NA	NA	NA
1545	chr4	146101300	146101499	10.0057	39.8875	15.1748	8.91028	3.51115	H1	intergenic	ENSG00000164162	ANAPC10	18.3318	15.0018	18.5909	18.0843
1546	chr13	42622900	42623099	70.0398	182.932	89.8814	65.612	4.88345	H1	exon	ENSG00000102780	DGKH	7.51957	8.84871	6.27452	6.12048
1547	chr13	43123450	43123649	32.6852	79.3165	40.077	27.8109	3.61142	H1	intergenic	ENSG00000120659	TNFSF11	0	0	0.149533	0.237364
1548	chr1	201924650	201924849	62.0353	121.496	71.9829	56.4318	3.50068	H1	promoter	ENSG00000134375	TIMM17A	119.105	124.548	153.747	93.7125
1549	chr11	64646650	64646849	114.065	193.936	127.235	106.113	3.56524	H1	intergenic	ENSG00000110047	EHD1	43.0254	36.6383	43.006	27.0175
1550	chr20	35463200	35463399	10.0057	42.6383	15.1748	7.29023	3.81206	H1	intron	ENSG00000149639	KIAA0889	7.32724	6.88366	6.39973	6.30631
1551	chr2	28022950	28023149	38.0216	114.161	50.1935	31.591	4.61854	H1	intron	ENSG00000158019	BRE	17.8967	25.2465	14.5627	17.9496
1552	chr8	1849450	1849649	12.6739	38.0536	16.7312	10.5303	3.03358	H1	intron	ENSG00000176595	KBTBD11	0.0459565	0.0478871	0.181795	0.051147
1553	chr6	109761550	109761749	14.008	50.8909	19.8439	10.5303	3.83756	H1	promoter	ENSG00000185250	PPIL6	0.207392	0.266906	0.128354	0.667093
1554	chr2	28021350	28021549	54.0307	136.168	66.5356	46.1714	4.48344	H1	intron	ENSG00000158019	BRE	17.8967	25.2465	14.5627	17.9496
1555	chr19	17792000	17792199	22.0125	53.6418	26.8477	20.2506	2.97891	H1	intron	ENSG00000130477	UNC13A	0.0596074	0.0162043	0.0307444	0.204692
1556	chr19	44101100	44101299	36.6875	91.2369	44.7462	33.211	3.8185	H1	promoter	ENSG00000124444	ZNF576	10.2843	8.26379	13.0595	8.5165
1557	chr17	79317800	79317999	102.058	191.185	115.562	96.393	3.93802	H1	intergenic	ENSG00000185168	LINC00482	0.0134139	0.0139565	0.0471871	0.0477286
1558	chr18	8609850	8610049	38.0216	83.9013	45.5244	34.8311	3.34506	H1	promoter	ENSG00000206418	RAB12	30.1098	29.0948	31.9469	41.6032
1559	chr1	154975850	154976049	42.0239	141.669	57.1973	34.8311	5.14468	H1	promoter	ENSG00000160685	ZBTB7B	13.2888	7.16548	9.20372	9.56328
1560	chr17	29876550	29876749	26.0148	61.8944	31.5169	23.4907	3.14248	H1	intergenic	ENSG00000221038	U6atac	3.98963	0	4.83251	13.3082
1561	chr5	149998650	149998849	130.074	292.967	152.915	117.454	5.24506	H1	intron	ENSG00000171992	SYNPO	51.7668	59.2121	57.072	49.4941
1562	chr3	141595050	141595249	138.078	262.707	155.25	127.174	4.50847	H1	promoter	ENSG00000069849	ATP1B3	204.729	203.583	278.227	408.963
1563	chr11	116969350	116969549	106.06	243.451	124.9	98.0131	5.00714	H1	intergenic	ENSG00000118137	APOA1	0.0497658	0.051478	0	0.177035
1564	chr1	23038200	23038399	8.6716	34.3858	12.062	6.75021	3.40544	H1	promoter	ENSG00000133216	EPHB2	24.9469	20.7958	19.0432	11.9832
1565	chr2	242447250	242447449	46.0262	111.41	54.8627	41.3113	4.05774	H1	intron	ENSG00000115694	STK25	165.474	151.969	154.152	159.162
1566	chr20	33814000	33814199	14.008	39.8875	17.5094	12.1504	2.9848	H1	promoter	ENSG00000088298	EDEM2	25.7199	22.746	26.0216	20.3188
1567	chr5	102090700	102090899	26.0148	67.3961	29.1823	20.2506	3.68679	H1	intergenic	ENSG00000145730	PAM	133.432	135.348	151.882	166.8
1568	chr4	5748600	5748799	12.6739	40.8044	15.1748	8.91028	3.43986	H1	intron	ENSG00000072840	EVC	5.38013	5.49071	4.90125	3.70471
1569	chr16	53164950	53165149	10.0057	42.6383	12.8402	5.67018	3.9925	H1	intron	ENSG00000177200	CHD9	8.80534	9.42048	10.7678	9.24392
1570	chr17	2303500	2303699	15.1515	42.2454	17.1759	11.6875	3.17829	H1	intron	ENSG00000070444	MNT	5.61632	11.1886	7.16616	5.64669
1571	chr8	128748500	128748699	106.06	169.178	110.893	98.0131	3.12822	H1	promoter	ENSG00000136997	MYC	32.9364	64.1088	26.6507	27.2964
1572	chr12	52443600	52443799	6.00341	34.3858	8.17104	2.43008	4.06727	H1	intron	ENSG00000123395	C12orf44	19.7273	22.4628	23.5382	15.9691
1573	chr12	56522450	56522649	23.3466	73.8148	27.6259	17.0105	4.24719	H1	promoter	ENSG00000135482	ZC3H10	3.67226	3.10933	4.64122	3.28975
1574	chr19	6058000	6058199	78.0444	158.175	85.2122	68.8521	4.10346	H1	intron	ENSG00000087903	RFX2	1.36012	1.2139	0.854962	0.932861
1575	chr22	37957400	37957599	174.099	364.489	192.603	146.615	5.46694	H1	promoter	ENSG00000128283	CDC42EP1	46.4597	61.7518	54.3301	49.4551
1576	chr11	95523800	95523999	102.058	218.693	113.227	83.4326	4.83755	H1	promoter	ENSG00000166037	CEP57	36.7638	34.7206	44.8667	38.4525
1577	chr1	9352800	9352999	6.00341	28.884	8.17104	2.43008	3.64129	H1	promoter	ENSG00000171621	SPSB1	19.6338	22.6467	16.1629	18.7114
1578	chr10	27443450	27443649	118.067	224.195	124.9	101.253	4.44438	H1	promoter	ENSG00000136758	YME1L1	134.8	128.512	123.37	111.529
1579	chr10	88725700	88725899	18.0102	45.3892	19.8439	13.7704	3.07944	H1	intergenic	ENSG00000148671	C10orf116	107.667	112.899	133.405	64.0885
1580	chr16	75273350	75273549	18.0102	45.3892	19.8439	13.7704	3.07944	H1	intron	ENSG00000240338	RP11-331F4.4	0.481186	0.998001	0.741454	0.123102
1581	chr4	15004450	15004649	46.0262	103.157	50.1935	36.4511	3.93442	H1	promoter	ENSG00000137449	CPEB2	1.71657	2.51997	3.86629	3.48541
1582	chr17	26662750	26662949	54.0307	122.413	59.5318	42.9313	4.19985	H1	promoter	ENSG00000109079	TNFAIP1	36.3767	55.4916	65.7491	50.9222
1583	chr19	34808000	34808199	162.092	314.974	171.592	135.274	5.05812	H1	intron	ENSG00000105220	GPI	63.9269	56.8218	60.5019	55.4002
1584	chr16	1877500	1877699	82.0466	163.676	87.5468	67.2321	4.22206	H1	promoter	ENSG00000180185	FAHD1	23.7684	23.3915	23.1623	20.6728
1585	chr19	47289950	47290149	146.083	281.963	155.25	120.694	4.88605	H1	intron	ENSG00000105281	SLC1A5	44.6213	43.9175	45.6912	37.2187
1586	chr2	27945850	27946049	2.00114	15.1297	3.50187	0.810025	3.02477	H1	intergenic	ENSG00000205334	AC074091.13	0	0.0290507	0.0245586	0
1587	chr13	21572850	21573049	2.00114	15.1297	3.50187	0.810025	3.02477	H1	intron	ENSG00000233851	LATS2-AS1	0	0.166655	0.143372	0
1588	chr15	60015350	60015549	2.00114	15.1297	3.50187	0.810025	3.02477	H1	intergenic	ENSG00000140299	BNIP2	65.5235	76.6026	66.1327	59.5232
1589	chr4	169655900	169656099	2.00114	15.1297	3.50187	0.810025	3.02477	H1	intron	NA	NA	NA	NA	NA	NA
1590	chr3	43413750	43413949	2.00114	15.1297	3.50187	0.810025	3.02477	H1	intron	ENSG00000011198	ABHD5	34.8713	25.534	22.3234	22.0998
1591	chr17	74728400	74728599	2.00114	15.1297	3.50187	0.810025	3.02477	H1	intron	ENSG00000161547	SRSF2	139.54	130.532	155.987	110.383
1592	chr9	138404000	138404199	2.00114	15.1297	3.50187	0.810025	3.02477	H1	intergenic	ENSG00000160345	C9orf116	6.19853	3.73708	5.5685	3.12059
1593	chr8	125263300	125263499	2.00114	15.1297	3.50187	0.810025	3.02477	H1	intergenic	ENSG00000214803	RP11-37N22.1	0	0	0.0644794	0
1594	chr2	11297350	11297549	2.00114	15.1297	3.50187	0.810025	3.02477	H1	intron	ENSG00000162976	PQLC3	16.1054	11.8759	11.1044	14.5352
1595	chr14	101229850	101230049	2.00114	15.1297	3.50187	0.810025	3.02477	H1	intergenic	ENSG00000214548	MEG3	182.362	192.621	198.438	198.926
1596	chr10	80141300	80141499	2.00114	15.1297	3.50187	0.810025	3.02477	H1	intergenic	NA	NA	NA	NA	NA	NA
1597	chr7	30783400	30783599	2.00114	15.1297	3.50187	0.810025	3.02477	H1	intergenic	ENSG00000106125	FAM188B	1.16318	1.30311	0.724099	1.06426
1598	chr11	70490850	70491049	2.00114	15.1297	3.50187	0.810025	3.02477	H1	intron	NA	NA	NA	NA	NA	NA
1599	chr12	6293750	6293949	2.00114	15.1297	3.50187	0.810025	3.02477	H1	intergenic	ENSG00000010278	CD9	608.08	516.733	645.439	523.338
1600	chr5	175868500	175868699	45.2257	96.5552	51.5943	40.6633	3.50317	H1	intergenic	ENSG00000113194	FAF2	42.148	43.5189	51.0664	41.3934
1601	chr16	70557900	70558099	51.6293	96.0051	57.1973	47.7915	2.96898	H1	promoter	ENSG00000189091	SF3B3	49.3234	48.7225	47.945	43.8446
1602	chr6	11771550	11771749	98.0557	221.444	110.893	83.4326	4.94938	H1	intron	ENSG00000111863	C6orf105	6.88138	5.30741	3.94984	2.02987
1603	chr10	31938500	31938699	70.0398	122.413	75.8739	63.992	3.09758	H1	intergenic	ENSG00000237797	RP11-472N13.3	1.47305	1.68702	1.12279	5.11978
1604	chr6	15522300	15522499	10.0057	34.3858	12.8402	7.29023	3.24801	H1	promoter	ENSG00000235488	RP11-560J1.1	0.131739	0.268269	0	0.230711
1605	chr17	80250150	80250349	46.0262	103.157	52.5281	39.6912	3.80215	H1	intergenic	ENSG00000244773	AC132872.2	0.160257	0.11888	0.161156	0.183712
1606	chr7	75268600	75268799	30.0171	75.6487	36.186	25.1108	3.67064	H1	intron	ENSG00000127946	HIP1	33.6469	33.6409	30.3695	34.8608
1607	chr22	46468850	46469049	106.06	180.181	115.562	98.0131	3.49317	H1	intergenic	ENSG00000197182	MIR4763	0.231726	0	0	0.0954375
1608	chr20	62290150	62290349	62.0353	171.929	75.8739	49.4115	5.11559	H1	intron	ENSG00000026036	RTEL1	1.02956	2.21045	0.993214	0.984656
1609	chr1	21578250	21578449	42.0239	105.908	50.1935	34.8311	4.17131	H1	intron	ENSG00000231105	RP5-1071N3.1	0.113881	0.21993	0.0286209	0
1610	chr19	3458350	3458549	50.0284	111.41	57.1973	41.3113	3.94374	H1	intron	ENSG00000095932	C19orf77	0.101646	0	0	0
1611	chr19	42754550	42754749	22.0125	61.8944	26.8477	17.0105	3.6992	H1	exon	ENSG00000105722	ERF	55.4093	49.2826	53.9977	52.3723
1612	chr2	74426350	74426549	30.0171	125.164	68.8702	33.211	4.92639	H1	promoter	ENSG00000065911	MTHFD2	32.6389	37.4636	49.4923	36.5405
1613	chr8	23196250	23196449	10.0057	50.8909	26.8477	12.1504	3.82757	H1	intron	ENSG00000253837	RP11-177H13.2	0.696575	2.71032	1.12623	1.18713
1614	chr21	28216850	28217049	14.008	53.6418	31.5169	15.3905	3.57372	H1	exon	ENSG00000154734	ADAMTS1	4.86762	36.0978	24.7682	15.1932
1615	chr12	101801150	101801349	19.3443	58.2266	36.186	21.3307	3.25436	H1	intron	ENSG00000120805	ARL1	109.983	115.563	142.211	126.233
1616	chr10	75571200	75571399	30.0171	75.6487	50.1935	33.211	3.20674	H1	promoter	ENSG00000166507	NDST2	12.4631	10.2838	10.6699	15.9376
1617	chr3	10232750	10232949	2.00114	31.6349	15.1748	4.05013	3.80173	H1	intron	ENSG00000134070	IRAK2	3.44665	4.66143	5.82232	5.89128
1618	chr7	23416200	23416399	58.033	152.673	99.2197	55.8917	4.49571	H1	intron	ENSG00000156928	C7orf30	21.8257	19.1699	19.8242	15.2514
1619	chr6	4358450	4358649	34.0193	75.6487	52.5281	33.211	3.02897	H1	intergenic	ENSG00000231811	RP3-527G5.1	0	0	0	0.801267
1620	chr12	4714800	4714999	6.00341	31.6349	17.5094	5.67018	3.30507	H1	intron	ENSG00000010219	DYRK4	51.9424	45.1436	49.1734	47.4049
1621	chr1	41707050	41707249	22.0125	59.1435	36.186	21.8707	3.14753	H1	intron	ENSG00000010803	SCMH1	35.1281	42.2402	29.5169	29.9383
1622	chr11	64863800	64863999	26.0148	70.147	43.1898	26.7308	3.36281	H1	promoter	ENSG00000149809	TM7SF2	12.0414	11.5236	14.2096	16.5823
1623	chr16	89766800	89766999	26.0148	81.1504	47.8589	26.7308	3.88106	H1	intron	ENSG00000158792	SPATA2L	1.40921	2.49648	1.32959	1.63335
1624	chr11	119187750	119187949	10.0057	45.3892	24.5131	8.91028	3.70448	H1	exon	ENSG00000076706	MCAM	730.422	768.687	1006.32	1045.79
1625	chr7	73498400	73498599	6.00341	28.884	15.1748	5.67018	3.09125	H1	promoter	ENSG00000106683	LIMK1	20.6459	16.9402	18.8224	20.1072
1626	chr3	51422850	51423049	10.0057	75.6487	36.186	8.91028	4.90485	H1	promoter	ENSG00000145050	MANF	248.625	253.43	411.569	318.473
1627	chr5	143568950	143569149	14.008	45.3892	26.8477	13.7704	3.15047	H1	intron	ENSG00000183775	KCTD16	0.0633049	0.0546538	0.0616586	0.0623212
1628	chrX	39716800	39716999	22.0125	56.3927	36.186	21.8707	2.96108	H1	intergenic	ENSG00000214047	RPS11P7	22.6645	19.8282	25.185	20.556
1629	chr6	43196850	43197049	10.0057	34.3858	17.5094	8.91028	2.9658	H1	intron	ENSG00000112667	C6orf108	25.4427	26.284	27.1434	21.8369
1630	chr8	145703350	145703549	10.0057	34.3858	17.5094	8.91028	2.9658	H1	intergenic	ENSG00000160972	PPP1R16A	7.15178	8.78527	11.2047	6.13602
1631	chr8	125633700	125633899	38.0216	97.6556	57.1973	36.4511	3.82344	H1	intron	NA	NA	NA	NA	NA	NA
1632	chr18	12408100	12408299	22.0125	89.403	43.1898	20.2506	4.56736	H1	promoter	ENSG00000141391	SLMO1	2.08537	1.84816	1.8052	1.25543
1633	chr3	194307900	194308099	78.0444	202.188	122.566	72.0922	4.92372	H1	promoter	ENSG00000229334	AC046143.3	4.25269	4.22523	2.74288	2.77227
1634	chr2	172963700	172963899	10.0057	45.3892	22.1785	8.91028	3.73175	H1	promoter	ENSG00000115844	DLX2	0	0.0695559	0	0
1635	chr15	58731900	58732099	70.0398	160.925	101.554	67.2321	4.24519	H1	intron	NA	NA	NA	NA	NA	NA
1636	chr1	33815000	33815199	42.0239	89.403	59.5318	41.3113	3.12734	H1	intron	ENSG00000225313	RP11-415J8.3	1.00509	1.40878	1.73725	1.56056
1637	chr20	33762600	33762799	26.0148	67.3961	40.8552	25.1108	3.28913	H1	exon	ENSG00000101000	PROCR	350.386	284.63	262.16	152.18
1638	chr12	6310400	6310599	98.0557	191.185	127.235	99.6331	3.87773	H1	promoter	ENSG00000010278	CD9	608.08	516.733	645.439	523.338
1639	chr9	137216750	137216949	2.00114	20.6315	8.17104	2.43008	3.182	H1	intergenic	ENSG00000186350	RXRA	9.32432	9.39429	7.24168	7.53367
1640	chr21	45139700	45139899	34.0193	103.157	57.1973	34.8311	4.19556	H1	promoter	NA	NA	NA	NA	NA	NA
1641	chr19	51205950	51206149	6.00341	34.3858	15.1748	7.29023	3.44723	H1	intron	ENSG00000161681	SHANK1	0.595123	0.243805	0.882726	0.0144908
1642	chr19	13265750	13265949	142.081	290.216	192.603	148.235	4.59848	H1	intergenic	ENSG00000213253	CTC-250I14.1	3.01102	2.51846	2.7476	2.03179
1643	chr11	67798850	67799049	18.0102	64.6452	33.8514	20.2506	3.7539	H1	promoter	ENSG00000110717	NDUFS8	98.336	74.2878	121.986	88.4582
1644	chr12	65996900	65997099	174.099	342.482	232.291	182.256	4.69039	H1	intergenic	ENSG00000215208	RP11-316O1.1	0.339985	0.644463	0.0588662	0.651579
1645	chr5	112849550	112849749	78.0444	141.669	101.554	78.5724	3.15974	H1	promoter	ENSG00000047188	YTHDC2	15	16.6582	17.0446	16.6456
1646	chrX	105065250	105065449	2.00114	26.1332	10.5056	2.43008	3.63069	H1	intergenic	ENSG00000123572	NRK	0.923523	0.527782	1.05225	0.531674
1647	chr2	172379250	172379449	26.0148	67.3961	40.8552	26.7308	3.21689	H1	promoter	ENSG00000071967	CYBRD1	23.0875	17.7165	23.7689	22.4819
1648	chr16	86543700	86543899	10.0057	50.8909	24.5131	10.5303	3.93513	H1	promoter	ENSG00000103241	FOXF1	0.912538	1.97986	0.498185	0.979411
1649	chr4	89513700	89513899	14.008	59.1435	31.5169	17.0105	3.80485	H1	promoter	ENSG00000138641	HERC3	8.9615	6.60423	7.65053	6.70606
1650	chr7	131317600	131317799	22.0125	59.1435	36.186	23.4907	3.06719	H1	intergenic	ENSG00000213261	AC093106.7	42.372	36.9999	40.3457	37.8742
1651	chr1	16277250	16277449	35.3534	87.5691	54.8627	38.0712	3.41687	H1	intron	ENSG00000234607	RP11-5P18.1	0.116428	0.713293	0.412479	0
1652	chr7	128472200	128472399	26.0148	78.3995	45.5244	28.3509	3.71233	H1	intron	ENSG00000128524	ATP6V1F	262.021	261.591	276.436	232.713
1653	chr3	9773600	9773799	42.0239	94.9047	52.5281	38.0712	3.57899	H1	promoter	ENSG00000156983	BRPF1	4.86008	7.74277	7.79529	8.27673
1654	chr16	31045000	31045199	58.033	138.918	75.8739	52.6516	4.27056	H1	promoter	ENSG00000103496	STX4	65.4462	73.0567	77.2559	52.7491
1655	chr20	44717950	44718149	78.0444	166.427	96.8852	72.0922	4.18442	H1	intron	ENSG00000124160	NCOA5	13.8741	13.3026	13.3004	13.1253
1656	chr7	47980600	47980799	202.115	391.998	243.964	195.216	5.02411	H1	intron	ENSG00000136273	HUS1	20.5578	19.486	21.6928	15.033
1657	chr9	110252250	110252449	18.0102	48.1401	24.5131	17.0105	2.97209	H1	intergenic	ENSG00000136826	KLF4	0.524446	2.54033	0.890809	0.232666
1658	chr1	26605000	26605199	22.0125	81.1504	33.8514	18.6306	4.42445	H1	exon	ENSG00000142669	SH3BGRL3	278.637	260.612	279.894	244.748
1659	chr19	45579250	45579449	14.008	53.6418	22.1785	12.1504	3.8635	H1	intron	ENSG00000170684	ZNF296	0.45102	0.123899	0.426958	0.251337
1660	chr1	27816450	27816649	110.063	177.431	127.235	106.113	3.04551	H1	intron	ENSG00000158195	WASF2	78.1282	80.7079	74.7643	91.4245
1661	chr9	136214750	136214949	18.0102	81.1504	33.8514	13.7704	4.69881	H1	intron	ENSG00000148297	MED22	12.4267	7.19693	9.57852	7.56312
1662	chr19	45349500	45349699	42.0239	108.659	57.1973	36.4511	4.14793	H1	promoter	ENSG00000130202	PVRL2	51.9779	51.3132	54.5209	43.6743
1663	chr11	6340450	6340649	106.06	182.932	124.9	99.6331	3.48509	H1	promoter	ENSG00000170955	PRKCDBP	108.925	110.155	94.3083	75.9257
1664	chr3	186640300	186640499	2.00114	17.8806	5.83646	0.810025	3.19737	H1	intergenic	ENSG00000233565	RP11-42D20.1	0.464792	0.535132	0.444255	0.899582
1665	chr16	4380950	4381149	2.00114	17.8806	5.83646	0.810025	3.19737	H1	intergenic	ENSG00000126603	GLIS2	5.29171	4.32516	5.94246	4.29272
1666	chr19	45257000	45257199	42.0239	97.6556	57.1973	39.6912	3.6047	H1	intron	ENSG00000069399	BCL3	11.0501	13.9274	9.9431	10.4075
1667	chr5	33441650	33441849	40.6898	83.9013	52.5281	39.1512	2.99584	H1	promoter	ENSG00000113407	TARS	131.3	119.553	129.942	108.874
1668	chr15	71056500	71056699	50.0284	103.157	64.201	46.1714	3.36183	H1	intergenic	ENSG00000137831	UACA	138.151	188.058	255.366	319.168
1669	chr6	3260400	3260599	6.00341	56.3927	19.8439	2.43008	4.84383	H1	intron	ENSG00000180822	PSMG4	38.9056	33.1959	23.5852	23.2063
1670	chr17	57408450	57408649	162.092	243.451	178.596	153.095	3.1763	H1	promoter	ENSG00000175155	YPEL2	16.8095	13.0416	22.5227	32.0144
1671	chr20	48599200	48599399	26.0148	86.6521	38.5206	20.2506	4.40898	H1	promoter	ENSG00000124216	SNAI1	5.20058	8.66412	3.31254	4.31185
1672	chr6	134496400	134496599	98.0557	180.181	115.562	89.9128	3.7919	H1	intron	NA	NA	NA	NA	NA	NA
1673	chr10	99497000	99497199	74.0421	191.185	99.2197	62.3719	4.99739	H1	promoter	ENSG00000155256	ZFYVE27	9.67673	9.29161	11.9971	10.1358
1674	chr19	49403850	49404049	20.6784	53.6418	28.4041	16.4705	3.21701	H1	promoter	ENSG00000104805	NUCB1	75.8456	71.9499	84.653	84.1608
1675	chr7	47521100	47521299	14.008	47.2231	21.4003	9.45029	3.62789	H1	intron	NA	NA	NA	NA	NA	NA
1676	chr5	150004050	150004249	14.008	48.1401	22.1785	10.5303	3.60726	H1	intron	ENSG00000171992	SYNPO	51.7668	59.2121	57.072	49.4941
1677	chr9	94185350	94185549	78.0444	141.669	92.216	70.4722	3.42173	H1	intron	ENSG00000165030	NFIL3	3.20288	6.43217	3.56107	3.80758
1678	chr4	3304650	3304849	50.0284	100.406	59.5318	41.3113	3.44317	H1	intergenic	ENSG00000159788	RGS12	39.7174	41.3294	26.2572	40.9841
1679	chr6	158403300	158403499	46.0262	92.1538	54.8627	38.0712	3.30797	H1	promoter	ENSG00000078269	SYNJ2	17.5078	21.5241	25.4168	10.7212
1680	chr10	72576200	72576399	74.0421	174.68	94.5506	57.5118	4.74951	H1	promoter	ENSG00000166224	SGPL1	9.0067	8.22996	8.31406	8.13077
1681	chr6	166756200	166756399	126.072	243.451	150.581	107.733	4.53267	H1	promoter	ENSG00000232468	AL022069.1	0.0504208	0.0944899	0.0709345	0
1682	chr17	79633850	79634049	54.0307	103.157	64.201	46.1714	3.25608	H1	promoter	ENSG00000185298	CCDC137	11.6906	9.45923	9.0978	8.95156
1683	chr12	56123650	56123849	70.0398	130.666	82.0995	57.5118	3.58981	H1	intergenic	ENSG00000135404	CD63	969.846	907.436	1020.91	1045.26
1684	chr19	8406450	8406649	98.0557	196.687	117.896	78.5724	4.4499	H1	intron	ENSG00000186994	KANK3	4.57242	4.50516	6.04277	6.03879
1685	chr22	32027950	32028149	22.0125	56.3927	29.1823	15.3905	3.39798	H1	intergenic	ENSG00000184708	EIF4ENIF1	30.644	14.6168	25.5492	21.4406
1686	chr10	76971150	76971349	130.074	202.188	143.577	115.834	3.2805	H1	promoter	ENSG00000165637	VDAC2	99.7693	95.2035	88.3199	113.682
1687	chr15	78441700	78441899	14.008	42.6383	19.8439	8.91028	3.37415	H1	promoter	ENSG00000166411	IDH3A	66.8633	56.0225	74.9693	61.0482
1688	chr19	39926000	39926199	142.081	229.697	162.253	127.174	3.63221	H1	intron	ENSG00000105193	RPS16	1236.8	1267.55	1239.98	972.677
1689	chr19	41169050	41169249	22.0125	61.8944	31.5169	15.3905	3.69149	H1	intergenic	ENSG00000105245	NUMBL	5.17579	5.46537	5.8171	4.99708
1690	chr8	22921550	22921749	102.058	196.687	122.566	83.4326	4.28767	H1	intron	ENSG00000120889	TNFRSF10B	129.392	120.38	125.293	111.937
1691	chr11	1404250	1404449	14.008	50.8909	22.1785	7.29023	3.96443	H1	intergenic	ENSG00000174672	BRSK2	0.0210236	0.209074	0.0374554	0.078275
1692	chr2	235354200	235354399	26.0148	59.1435	33.8514	18.6306	3.17373	H1	intergenic	ENSG00000232690	AC097713.2	486.631	396.71	338.866	270.369
1693	chr20	48808300	48808499	54.0307	138.918	73.5393	34.8311	4.76403	H1	exon	ENSG00000172216	CEBPB	1.80186	3.11129	2.97271	2.962
1694	chr1	182993250	182993449	24.6807	56.3927	32.2951	18.6306	3.05611	H1	promoter	ENSG00000135862	LAMC1	94.1626	111.105	120.487	133.798
1695	chr14	77278700	77278899	62.0353	111.41	73.5393	52.6516	3.15037	H1	intron	ENSG00000013523	ANGEL1	10.707	10.2721	11.3178	12.6916
1696	chr16	86857650	86857849	106.06	188.434	124.9	89.9128	3.87181	H1	intergenic	NA	NA	NA	NA	NA	NA
1697	chr11	118973450	118973649	36.6875	80.2335	47.0807	27.8109	3.45299	H1	intergenic	ENSG00000172375	C2CD2L	4.00673	3.97837	6.75216	3.91827
1698	chr13	107187350	107187549	22.0125	53.6418	29.1823	15.3905	3.21421	H1	exon	ENSG00000125266	EFNB2	24.7332	36.7786	27.6302	37.1318
1699	chr10	95240050	95240249	94.0535	202.188	122.566	72.0922	4.71955	H1	intron	ENSG00000138119	MYOF	108.541	109.685	107.006	93.2074
1700	chr6	34202950	34203149	6.00341	23.3823	10.5056	2.43008	2.98482	H1	intergenic	ENSG00000137309	HMGA1	430.737	409.448	381.899	271.359
1701	chr9	136629350	136629549	6.00341	23.3823	10.5056	2.43008	2.98482	H1	intron	ENSG00000123453	SARDH	0.141425	0.0186247	0.0532072	0.0373271
1702	chr17	33915250	33915449	42.0239	83.9013	52.5281	31.591	3.28261	H1	promoter	ENSG00000006125	AP2B1	72.4338	72.5668	74.7954	76.3438
1703	chr11	131739800	131739999	30.0171	64.6452	38.5206	21.8707	3.14935	H1	intron	NA	NA	NA	NA	NA	NA
1704	chr6	32940100	32940299	78.0444	130.666	92.216	65.612	3.11738	H1	promoter	ENSG00000204257	HLA-DMA	1.81777	2.19002	1.52836	2.03723
1705	chr1	157107500	157107699	106.06	166.427	122.566	93.1529	3.06315	H1	intron	ENSG00000117036	ETV3	8.52822	13.3788	11.609	10.5425
1706	chr9	138885250	138885449	110.063	182.932	129.569	98.0131	3.43498	H1	intergenic	ENSG00000251337	AL355574.1	3.11969	1.81742	2.53628	3.19994
1707	chr11	18416450	18416649	28.683	65.5622	39.2988	24.0307	3.13131	H1	promoter	ENSG00000134333	LDHA	437.188	354.862	465.597	279.044
1708	chrX	46618050	46618249	14.008	42.6383	22.1785	10.5303	3.21187	H1	intron	ENSG00000065923	SLC9A7	3.31202	3.83344	1.59874	3.43667
1709	chr20	50063100	50063299	21.2121	52.5414	30.1161	16.6865	3.07613	H1	intron	NA	NA	NA	NA	NA	NA
1710	chr8	141001850	141002049	22.0125	81.1504	38.5206	13.7704	4.53446	H1	intron	NA	NA	NA	NA	NA	NA
1711	chr12	52400900	52401099	54.0307	147.171	80.5431	41.3113	4.78527	H1	promoter	ENSG00000161835	GRASP	29.3294	61.0555	29.9225	29.2102
1712	chr19	4182050	4182249	102.058	169.178	120.231	94.773	3.20681	H1	intron	ENSG00000077463	SIRT6	8.19598	7.58201	8.85343	6.38586
1713	chr13	99853250	99853449	82.0466	141.669	99.2197	76.9524	3.11058	H1	promoter	ENSG00000134882	UBAC2	1.74787	1.34082	1.57496	1.83491
1714	chr1	154599900	154600099	46.0262	138.918	73.5393	38.0712	4.82126	H1	intron	ENSG00000160710	ADAR	78.572	92.5179	81.6692	84.6963
1715	chr8	8486100	8486299	6.00341	28.884	12.8402	4.05013	3.29582	H1	intergenic	ENSG00000176305	AC087269.1	0.133501	0.498754	0.140993	0.331985
1716	chr11	12132300	12132499	34.0193	78.3995	47.8589	29.9709	3.33904	H1	promoter	ENSG00000133816	MICAL2	80.9973	78.0287	94.6969	55.8132
1717	chr17	48473950	48474149	22.0125	56.3927	32.2951	18.6306	3.17018	H1	intron	ENSG00000108829	LRRC59	126.708	127.062	133.655	116.332
1718	chr19	42786450	42786649	59.3671	115.995	78.9867	49.4115	3.50814	H1	intergenic	ENSG00000079432	CIC	11.8236	13.4991	14.7229	14.2778
1719	chr5	14040050	14040249	10.0057	32.1851	17.9763	5.34617	3.07734	H1	intergenic	ENSG00000039139	DNAH5	0.157237	0.202228	0.111636	0.38151
1720	chr5	38807450	38807649	10.0057	31.6349	17.5094	5.67018	3.00103	H1	intergenic	ENSG00000248577	RP11-122C5.2	0.398039	0.0927307	0	0.159472
1721	chr16	89753450	89753649	50.0284	92.1538	64.201	41.3113	2.99927	H1	promoter	ENSG00000185324	CDK10	19.5668	17.3717	22.2872	16.7048
1722	chr3	52273000	52273199	30.0171	64.6452	40.8552	23.4907	3.03885	H1	exon	ENSG00000173366	RP11-330H6.5	0	0.0121587	0	0.184781
1723	chr22	37626350	37626549	38.0216	89.403	54.8627	29.9709	3.71003	H1	intron	ENSG00000128340	RAC2	196.732	157.688	152.25	62.7872
1724	chr16	8962450	8962649	34.0193	97.6556	54.8627	25.1108	4.30405	H1	intron	ENSG00000153048	CARHSP1	21.5149	21.2008	21.4749	19.0088
1725	chr9	34989800	34989999	54.0307	133.417	78.2085	41.3113	4.43657	H1	promoter	ENSG00000137094	DNAJB5	8.52572	7.59017	11.7032	7.30798
1726	chr10	21624950	21625149	74.0421	136.168	92.216	63.992	3.47566	H1	intergenic	ENSG00000207264	RNU6-15	1.2116	0.777885	0	0
1727	chr7	1543500	1543699	18.0102	53.6418	29.1823	13.7704	3.48062	H1	intron	ENSG00000164880	INTS1	20.5897	26.2931	22.2851	18.0024
1728	chr14	91798700	91798899	14.008	39.8875	22.1785	10.5303	2.98691	H1	intron	ENSG00000119714	GPR68	0.367208	0.334899	0.426588	0.495584
1729	chr9	138852050	138852249	18.0102	56.3927	24.5131	21.8707	3.36965	H1	intron	ENSG00000130560	UBAC1	21.3613	18.8818	18.2793	17.3763
1730	chr10	126391550	126391749	30.0171	78.3995	38.5206	34.8311	3.44496	H1	intron	ENSG00000189319	FAM53B	4.06981	3.51806	4.24409	3.77023
1731	chr16	50228800	50228999	2.00114	23.3823	5.83646	4.05013	3.45563	H1	intron	ENSG00000121274	PAPD5	2.3554	2.16915	1.83383	2.62501
1732	chr5	172315150	172315349	6.80387	29.4342	10.5056	8.58627	2.99751	H1	intron	ENSG00000113719	ERGIC1	157.466	156.364	165.849	152.004
1733	chr2	174828200	174828399	106.06	207.69	122.566	114.214	4.01606	H1	intron	ENSG00000172845	SP3	20.8026	19.3046	16.4697	18.6393
1734	chrX	47510650	47510849	18.0102	70.147	26.8477	21.8707	4.09997	H1	promoter	ENSG00000126767	ELK1	21.8515	25.51	22.5047	18.8496
1735	chr17	60782200	60782399	46.0262	108.659	57.1973	51.0316	3.67579	H1	intron	ENSG00000011028	MRC2	6.19288	6.06156	7.77075	10.83
1736	chr2	64979000	64979199	50.0284	109.576	59.5318	56.9718	3.43565	H1	intergenic	ENSG00000179833	SERTAD2	5.77578	10.4884	8.7141	7.48986
1737	chr9	20731800	20731999	62.0353	149.922	75.8739	72.0922	4.17996	H1	intron	ENSG00000188352	KIAA1797	12.8087	14.2521	12.5693	15.5781
1738	chr1	6453900	6454099	78.0444	149.922	89.8814	86.6727	3.42081	H1	intergenic	ENSG00000097021	ACOT7	29.9954	28.6923	31.2869	29.5322
1739	chr19	41223200	41223399	28.683	74.7317	36.186	34.2911	3.35374	H1	promoter	ENSG00000086544	ITPKC	2.73886	2.49997	2.6635	3.31915
1740	chr14	69471700	69471899	38.0216	125.164	50.1935	47.7915	4.6337	H1	intergenic	ENSG00000072110	ACTN1	202.512	230.876	233.72	181.733
1741	chrX	39966750	39966949	10.0057	48.1401	15.1748	13.7704	3.84905	H1	intron	ENSG00000183337	BCOR	9.82052	14.3302	12.1359	17.0214
1742	chr3	11887850	11888049	82.0466	166.427	94.5506	88.2927	3.84745	H1	intron	ENSG00000144559	TAMM41	16.6209	11.2913	15.5019	13.0421
1743	chr17	79881550	79881749	30.0171	72.8978	36.186	33.211	3.22058	H1	intron	ENSG00000197063	MAFG	9.9605	10.7782	11.2224	11.3826
1744	chr2	220083000	220083199	50.0284	100.406	57.1973	54.2717	3.07287	H1	exon	ENSG00000115657	ABCB6	23.9144	21.9358	19.3997	26.2838
1745	chr8	8187350	8187549	30.0171	92.1538	38.5206	34.8311	4.11055	H1	intron	ENSG00000182319	PRAGMIN	5.11225	7.72889	5.47749	7.33446
1746	chr17	48796750	48796949	42.0239	89.403	47.8589	46.1714	3.1233	H1	promoter	ENSG00000108848	LUC7L3	145.415	100.631	126.507	132.298
1747	chr16	11439700	11439899	22.0125	61.8944	26.8477	25.1108	3.36787	H1	promoter	ENSG00000175643	RMI2	9.09482	6.86724	4.26242	6.70279
1748	chr17	19410850	19411049	18.0102	56.3927	22.1785	20.2506	3.50391	H1	intergenic	ENSG00000228331	AC004448.4	14.7167	15.2346	11.6543	17.0281
1749	chr19	51868900	51869099	46.0262	97.6556	52.5281	49.4115	3.26693	H1	intron	ENSG00000105379	ETFB	27.9876	27.6958	28.7077	23.5852
1750	chr3	184177750	184177949	42.0239	86.6521	45.5244	42.9313	3.10755	H1	intergenic	NA	NA	NA	NA	NA	NA
1751	chr22	41699900	41700099	2.00114	20.6315	3.50187	2.43008	3.50871	H1	intron	ENSG00000100401	RANGAP1	56.983	50.4029	48.5089	43.415
1752	chr2	232139050	232139249	2.00114	20.6315	3.50187	2.43008	3.50871	H1	intron	ENSG00000135931	ARMC9	8.10597	7.12332	10.4429	7.40601
1753	chr6	144031400	144031599	2.00114	20.6315	3.50187	2.43008	3.50871	H1	intron	NA	NA	NA	NA	NA	NA
1754	chr17	48130050	48130249	62.0353	155.424	68.8702	62.3719	4.57655	H1	intron	ENSG00000246640	RP11-1094H24.4	0.0794656	0.016528	0	0.0282667
1755	chr21	28218300	28218499	34.0193	86.6521	38.5206	34.8311	3.74547	H1	intergenic	ENSG00000154734	ADAMTS1	4.86762	36.0978	24.7682	15.1932
1756	chrX	40014100	40014299	14.008	50.8909	17.5094	15.3905	3.67736	H1	intron	ENSG00000183337	BCOR	9.82052	14.3302	12.1359	17.0214
1757	chr8	86157750	86157949	58.033	147.171	66.5356	62.3719	4.43938	H1	promoter	ENSG00000185015	CA13	1.14619	1.12363	2.31486	1.22884
1758	chr9	110347400	110347599	2.00114	17.8806	3.50187	2.43008	3.17867	H1	intergenic	ENSG00000236005	RP11-438P9.1	0.137921	0.140105	0	0
1759	chr1	53577200	53577399	2.00114	17.8806	3.50187	2.43008	3.17867	H1	intron	ENSG00000227644	HIGD1AP11	2.61719	0	0	0
1760	chr21	33863750	33863949	2.00114	17.8806	3.50187	2.43008	3.17867	H1	intron	ENSG00000166979	C21orf63	15.6484	13.9658	9.33959	7.59635
1761	chr22	38885050	38885249	2.00114	17.8806	3.50187	2.43008	3.17867	H1	intron	ENSG00000100201	DDX17	192.082	186.893	203.608	217.839
1762	chr16	81436600	81436799	2.00114	17.8806	3.50187	2.43008	3.17867	H1	intergenic	ENSG00000153815	CMIP	39.2941	44.1486	37.9536	40.4903
1763	chr1	27848250	27848449	22.0125	72.8978	26.8477	23.4907	4.04399	H1	intergenic	ENSG00000158195	WASF2	78.1282	80.7079	74.7643	91.4245
1764	chrX	40034550	40034749	38.0216	92.1538	43.1898	39.6912	3.66754	H1	intron	ENSG00000183337	BCOR	9.82052	14.3302	12.1359	17.0214
1765	chr16	69166650	69166849	50.0284	100.406	54.8627	51.0316	3.20457	H1	promoter	ENSG00000103044	HAS3	0.676857	0.39466	0.179724	1.06731
1766	chr20	23338050	23338249	54.0307	130.666	61.8664	55.8917	4.16687	H1	intergenic	ENSG00000232645	RP3-322G13.5	0.131644	0.228069	0.197557	0
1767	chr16	88518750	88518949	10.0057	48.1401	15.1748	12.1504	3.91828	H1	intergenic	ENSG00000179588	ZFPM1	0.875439	0.788006	0.540964	0.378916
1768	chr19	39889150	39889349	14.008	42.6383	17.5094	15.3905	3.04179	H1	exon	ENSG00000063322	MED29	11.7856	11.3325	11.0325	11.0653
1769	chr19	48997250	48997449	14.008	42.6383	17.5094	15.3905	3.04179	H1	exon	ENSG00000142235	LMTK3	0.0156462	0.0407422	0	0.0417817
1770	chr3	48129850	48130049	70.0398	193.936	87.5468	75.3323	5.00847	H1	intron	ENSG00000047849	MAP4	164.601	153.762	160.472	143.276
1771	chr15	41187400	41187599	26.0148	65.5622	31.5169	27.2708	3.23229	H1	promoter	ENSG00000104142	VPS18	28.1802	31.8258	34.8891	28.2833
1772	chr22	29706300	29706499	7.3375	31.6349	10.5056	7.83024	3.23695	H1	intron	ENSG00000185340	GAS2L1	11.5346	11.2744	11.555	10.0095
1773	chr7	99613600	99613799	142.081	270.96	157.584	146.615	4.39617	H1	promoter	ENSG00000106261	ZKSCAN1	16.6662	13.8124	17.8846	18.402
1774	chr21	44313700	44313899	54.0307	136.168	64.201	55.8917	4.31637	H1	promoter	NA	NA	NA	NA	NA	NA
1775	chr1	32757650	32757849	38.0216	97.6556	45.5244	39.6912	3.87559	H1	promoter	ENSG00000116478	HDAC1	246.652	265.892	228.337	243.768
1776	chr1	12227100	12227299	14.008	61.8944	19.8439	15.3905	4.23534	H1	promoter	ENSG00000028137	TNFRSF1B	13.2047	16.916	11.867	7.66112
1777	chr10	81108100	81108299	46.0262	103.157	52.5281	51.0316	3.50597	H1	promoter	ENSG00000108179	PPIF	20.3611	17.9128	19.4005	14.063
1778	chr5	14926950	14927149	14.008	45.3892	17.5094	17.0105	3.19987	H1	intergenic	ENSG00000249928	UQCRBP3	0.296595	0	0	0
1779	chr9	34701700	34701899	10.0057	37.1366	12.8402	12.1504	3.1819	H1	intergenic	ENSG00000137077	CCL21	0.989778	0.681026	1.3572	1.75217
1780	chr1	15733550	15733749	14.008	48.1401	17.5094	17.0105	3.41524	H1	intergenic	ENSG00000228140	RP3-467K16.4	0.0450084	0.0234415	0	0.02671
1781	chr10	23002850	23003049	14.008	48.1401	17.5094	17.0105	3.41524	H1	intron	ENSG00000150867	PIP4K2A	41.1024	42.5356	45.161	44.5133
1782	chr1	201420800	201420999	2.00114	34.3858	5.83646	5.67018	4.24087	H1	intergenic	ENSG00000224818	RP11-134G8.8	5.51341	3.14155	3.86425	2.93223
1783	chr19	46877250	46877449	54.0307	127.915	61.8664	62.3719	3.9553	H1	intron	ENSG00000011485	PPP5C	60.8163	54.6755	67.0011	49.8375
1784	chr17	500950	501149	26.0148	81.1504	31.5169	31.591	3.97289	H1	intron	NA	NA	NA	NA	NA	NA
1785	chr5	133863600	133863799	74.0421	188.434	80.5431	76.9524	4.88459	H1	intron	ENSG00000043143	PHF15	10.9552	8.5636	7.51718	5.74348
1786	chr9	116918650	116918849	10.8061	38.237	12.3733	11.5024	3.29009	H1	promoter	ENSG00000196739	COL27A1	18.1264	13.7955	18.8206	13.3906
1787	chr11	65344250	65344449	14.008	42.6383	15.953	14.8505	3.13813	H1	promoter	ENSG00000173442	EHBP1L1	8.04456	10.2731	6.99544	8.00353
1788	chr7	28449600	28449799	2.00114	23.3823	3.50187	2.43008	3.78494	H1	intron	NA	NA	NA	NA	NA	NA
1789	chr4	21530150	21530349	2.00114	26.1332	3.50187	2.43008	4.02169	H1	intron	NA	NA	NA	NA	NA	NA
1790	chr22	50765000	50765199	22.0125	70.147	24.5131	23.4907	3.96918	H1	intron	ENSG00000205593	FAM116B	1.26613	1.35778	1.11843	1.57312
1791	chr12	112036100	112036299	62.0353	152.673	66.5356	65.612	4.48168	H1	intron	ENSG00000204842	ATXN2	40.2963	38.6085	41.5716	49.7034
1792	chr3	136538050	136538249	30.0171	74.7317	32.2951	31.591	3.4863	H1	promoter	ENSG00000168917	TMEM22	3.63389	6.31941	7.60367	7.56577
1793	chr12	13044000	13044199	58.033	133.417	61.8664	60.7519	4.09539	H1	promoter	ENSG00000013588	GPRC5A	13.6418	10.0233	5.33773	4.56033
1794	chr14	73698650	73698849	18.0102	60.9774	20.6221	19.7106	3.85736	H1	intergenic	ENSG00000100767	PAPLN	5.03681	4.66882	6.98093	3.97034
1795	chr1	112051550	112051749	6.00341	37.1366	8.17104	7.29023	3.94424	H1	intron	ENSG00000064703	DDX20	9.8113	12.2823	14.7091	12.0533
1796	chr3	127497800	127497999	6.00341	37.1366	8.17104	7.29023	3.94424	H1	intron	ENSG00000074416	MGLL	35.3748	35.1569	39.9211	27.6145
1797	chr21	44752600	44752799	14.008	50.8909	17.5094	16.4705	3.63249	H1	intergenic	NA	NA	NA	NA	NA	NA
1798	chrX	41194350	41194549	46.0262	119.662	52.5281	51.0316	4.18666	H1	intron	ENSG00000215301	DDX3X	256.079	298.603	274.924	216.6
1799	chr8	28204650	28204849	18.0102	82.0674	22.9567	22.4107	4.68197	H1	exon	ENSG00000239198	RP11-380I10.1	23.9187	24.7215	18.3428	18.8793
1800	chr11	65667600	65667799	30.0171	78.3995	33.8514	33.211	3.6021	H1	intron	ENSG00000175592	FOSL1	26.0937	36.805	25.8994	11.538
1801	chr1	249132950	249133149	114.065	226.946	122.566	120.694	4.32154	H1	promoter	ENSG00000171161	ZNF672	17.7132	15.0669	15.9237	13.7199
1802	chr19	45959300	45959499	82.0466	199.437	89.8814	88.2927	4.79338	H1	intergenic	ENSG00000012061	ERCC1	54.8295	50.8741	44.7603	33.2669
1803	chr7	138720450	138720649	46.0262	136.168	52.5281	52.6516	4.68537	H1	exon	ENSG00000146858	ZC3HAV1L	10.1461	8.41331	20.5988	16.8205
1804	chr20	30192550	30192749	130.074	312.223	143.577	144.995	5.35908	H1	promoter	ENSG00000125968	ID1	17.4716	31.1303	11.7124	16.0908
1805	chr8	22298550	22298749	58.033	130.666	61.8664	62.3719	3.9695	H1	promoter	ENSG00000120896	SORBS3	53.8648	52.8935	51.0757	52.2587
1806	chr9	100818100	100818299	2.00114	34.3858	3.50187	4.05013	4.47409	H1	promoter	ENSG00000095380	NANS	39.7195	42.7936	51.3856	42.5218
1807	chr2	68480350	68480549	35.3534	91.2369	44.7462	49.9516	3.46234	H1	intergenic	ENSG00000221823	PPP3R1	32.1643	35.4501	39.0698	39.7956
1808	chr20	30064350	30064549	6.00341	37.1366	10.5056	13.7704	3.51726	H1	exon	ENSG00000180383	DEFB124	0.0933852	0.368286	0.329988	2.32683
1809	chr16	89284800	89284999	2.00114	23.3823	5.83646	7.29023	3.2096	H1	promoter	ENSG00000170100	ZNF778	2.33454	2.01205	2.73362	2.29979
1810	chr9	123693150	123693349	6.00341	31.6349	10.5056	12.1504	3.09338	H1	intergenic	ENSG00000056558	TRAF1	0.852496	1.43836	2.316	0.773103
1811	chr9	131534200	131534399	10.0057	53.6418	17.5094	20.2506	3.88461	H1	intergenic	ENSG00000160445	ZER1	7.29986	7.72853	6.98215	8.66388
1812	chr11	73019050	73019249	50.0284	136.168	64.201	68.8521	4.20856	H1	promoter	ENSG00000110237	ARHGEF17	19.7048	23.8697	28.335	37.0335
1813	chr8	10483100	10483299	78.0444	182.932	94.5506	101.253	4.26467	H1	intron	ENSG00000253649	RP11-981G7.4	0.0393737	0.0407602	0.162558	0
1814	chr10	73032050	73032249	28.683	78.3995	36.186	39.6912	3.43634	H1	intron	ENSG00000237512	RP11-790G19.2	0.843869	1.73048	1.79522	0.643145
1815	chr11	75024000	75024199	42.0239	97.6556	52.5281	52.6516	3.32864	H1	intron	ENSG00000137486	ARRB1	99.1754	96.6941	92.6902	80.405
1816	chr19	3699050	3699249	38.0216	152.673	59.5318	59.1318	5.08398	H1	intron	ENSG00000186111	PIP5K1C	17.2105	19.245	23.8187	19.4893
1817	chr22	30642200	30642399	2.00114	34.3858	8.17104	7.29023	4.0277	H1	intron	NA	NA	NA	NA	NA	NA
1818	chr2	38604200	38604399	38.0216	103.157	50.1935	49.4115	3.82183	H1	intron	ENSG00000119787	ATL2	54.4139	46.3648	52.052	38.7024
1819	chr12	112547100	112547299	2.00114	23.3823	5.83646	5.67018	3.32223	H1	intergenic	ENSG00000111300	NAA25	15.7127	15.0461	12.936	17.3156
1820	chr20	33264500	33264699	2.00114	20.6315	5.83646	5.67018	2.99767	H1	intron	ENSG00000101464	PIGU	24.808	20.3472	19.4331	30.1802
1821	chr22	39097150	39097349	34.0193	144.42	57.1973	57.5118	5.01511	H1	intergenic	ENSG00000100221	JOSD1	74.5927	83.2227	90.5463	67.7799
1822	chr17	40829300	40829499	14.008	57.3096	22.9567	21.8707	3.67619	H1	intergenic	ENSG00000068137	PLEKHH3	1.86218	1.52338	1.81992	2.4354
1823	chr19	36248050	36248249	58.033	169.178	82.8777	78.5724	4.63981	H1	promoter	ENSG00000004776	HSPB6	3.96197	3.96207	3.90414	3.33215
1824	chr1	45242000	45242199	90.0512	163.676	99.2197	101.253	3.32823	H1	promoter	ENSG00000225721	RP11-269F19.2	0.585401	1.84107	0.179063	0.541666
1825	chr19	2151050	2151249	10.8061	39.3373	14.241	14.7425	3.12875	H1	intron	ENSG00000065000	AP3D1	33.4492	34.3907	40.5613	34.12
1826	chr20	35202200	35202399	30.0171	122.413	40.8552	42.9313	4.94276	H1	promoter	ENSG00000101082	SLA2	0.0924816	0.0390589	0.099273	0.026676
1827	chr11	10952400	10952599	26.0148	97.6556	36.186	36.4511	4.44972	H1	intergenic	ENSG00000236287	ZBED5	46.5408	38.5737	42.6142	46.5587
1828	chr13	77404900	77405099	2.00114	28.884	5.83646	5.67018	3.83981	H1	intergenic	ENSG00000178695	KCTD12	45.3638	45.1692	26.8006	28.961
1829	chr19	34286150	34286349	98.0557	210.441	115.562	115.834	4.26803	H1	intergenic	ENSG00000153885	KCTD15	11.8197	11.9436	10.7522	13.1417
1830	chr6	32821150	32821349	26.0148	78.3995	33.8514	34.8311	3.7039	H1	promoter	ENSG00000204261	XXbac-BPG246D15.8	6.98883	6.7014	4.73853	5.79734
1831	chr5	6712450	6712649	14.008	46.3062	19.8439	20.2506	3.05042	H1	intergenic	ENSG00000112941	PAPD7	12.5336	11.8983	16.1171	12.5445
1832	chr11	72929600	72929799	18.0102	56.3927	24.5131	25.1108	3.25865	H1	promoter	ENSG00000175591	P2RY2	1.58707	1.50039	1.57351	0.778023
1833	chr17	21189050	21189249	46.0262	174.68	68.8702	72.0922	5.18547	H1	intron	ENSG00000034152	MAP2K3	17.9872	18.7651	29.5753	18.2337
1834	chr1	32420900	32421099	35.3534	82.9843	43.1898	44.5514	3.14722	H1	intergenic	ENSG00000184007	PTP4A2	134.437	136.754	127.411	154.182
1835	chr22	44758950	44759149	10.0057	40.8044	15.1748	15.9305	3.21793	H1	intergenic	ENSG00000138944	KIAA1644	0.0228351	0.0297432	0.0301104	0.0609944
1836	chr6	41748600	41748799	30.0171	147.171	45.5244	51.0316	5.37212	H1	promoter	ENSG00000137218	FRS3	2.00612	1.94453	1.55089	1.73198
1837	chr11	65341200	65341399	6.00341	78.3995	15.1748	18.6306	5.20342	H1	exon	ENSG00000173442	EHBP1L1	8.04456	10.2731	6.99544	8.00353
1838	chr1	201509050	201509249	150.085	251.704	164.588	169.295	3.51943	H1	intergenic	ENSG00000159176	CSRP1	479.985	573.057	795.018	352.491
1839	chr17	1390600	1390799	14.008	72.8978	22.1785	25.1108	4.40394	H1	intron	ENSG00000197879	MYO1C	50.2426	48.3406	47.257	48.1362
1840	chr1	29450750	29450949	3.33523	26.1332	6.61465	7.83024	3.26697	H1	intergenic	ENSG00000225616	RP4-604A21.1	15.6798	18.3641	13.9793	16.209
1841	chr4	140477400	140477599	23.3466	63.7283	29.1823	31.591	3.16008	H1	exon	ENSG00000145391	SETD7	19.7282	24.0014	25.5992	20.9008
1842	chr4	2243600	2243799	22.0125	59.1435	24.5131	29.9709	3.11619	H1	intron	ENSG00000130997	POLN	1.3609	0.714239	0.674474	0.531003
1843	chr17	42295850	42296049	2.00114	26.1332	3.50187	7.29023	3.67749	H1	intron	ENSG00000108312	UBTF	31.1994	26.544	28.0821	29.3492
1844	chr20	50061000	50061199	2.00114	26.1332	3.50187	7.29023	3.67749	H1	intron	NA	NA	NA	NA	NA	NA
1845	chr19	47777150	47777349	35.3534	82.0674	37.7424	44.0114	3.25772	H1	promoter	ENSG00000105321	CCDC9	8.24023	10.5276	9.10737	5.47993
1846	chr10	43249300	43249499	2.00114	28.884	3.50187	7.29023	3.90869	H1	intergenic	ENSG00000230425	AL022344.6	3.31161	3.22241	1.87681	3.87224
1847	chr12	111851300	111851499	42.0239	94.9047	45.5244	52.6516	3.35088	H1	intron	ENSG00000111252	SH2B3	51.7168	50.4611	55.8273	49.8892
1848	chr5	172665350	172665549	2.00114	45.3892	5.83646	8.91028	4.70129	H1	intergenic	ENSG00000183072	NKX2-5	0	0.0452799	0	0
1849	chr17	8055100	8055299	90.0512	251.704	106.223	117.454	5.29198	H1	intron	ENSG00000179094	PER1	2.31571	14.5487	4.94033	2.67668
1850	chr17	26663700	26663899	94.0535	196.687	99.2197	110.973	4.21098	H1	intron	ENSG00000109079	TNFAIP1	36.3767	55.4916	65.7491	50.9222
1851	chr10	111969800	111969999	6.00341	34.3858	8.17104	10.5303	3.56127	H1	promoter	ENSG00000119950	MXI1	5.50019	4.348	5.24338	5.35573
1852	chr10	31116300	31116499	2.00114	23.3823	3.50187	5.67018	3.51672	H1	intergenic	NA	NA	NA	NA	NA	NA
1853	chr12	98832950	98833149	6.00341	42.6383	10.5056	13.7704	3.91476	H1	intergenic	ENSG00000227825	SLC9A7P1	0.467452	0.692487	0.701781	0.460037
1854	chr17	17597850	17598049	46.0262	103.157	52.5281	57.5118	3.38244	H1	intron	ENSG00000108557	RAI1	6.51362	7.26687	6.95923	7.75086
1855	chr6	30523000	30523199	16.6761	53.6418	20.6221	24.0307	3.30752	H1	intron	ENSG00000204590	GNL1	47.632	56.871	61.7612	37.676
1856	chr10	35103600	35103799	2.00114	42.6383	5.83646	10.5303	4.50172	H1	intron	ENSG00000148498	PARD3	11.9908	10.4982	6.4429	6.93371
1857	chr11	66623800	66623999	2.00114	45.3892	5.83646	10.5303	4.64077	H1	intron	ENSG00000173621	LRFN4	5.41005	5.88566	8.99059	6.42574
1858	chr22	45034150	45034349	2.00114	20.6315	3.50187	5.67018	3.21303	H1	intergenic	ENSG00000186654	PRR5	1.24212	0.521268	0.668588	0.815043
1859	chr6	3064300	3064499	2.00114	20.6315	3.50187	5.67018	3.21303	H1	intergenic	ENSG00000137275	RIPK1	12.7498	12.8292	11.9629	13.4509
1860	chr14	77293850	77294049	2.00114	20.6315	3.50187	5.67018	3.21303	H1	intron	ENSG00000013523	ANGEL1	10.707	10.2721	11.3178	12.6916
1861	chr3	27634150	27634349	2.00114	23.3823	3.50187	4.05013	3.64128	H1	intergenic	ENSG00000223968	AC098614.1	0.429505	0.565007	1.54016	0.730353
1862	chr5	149981200	149981399	6.00341	39.8875	8.17104	8.91028	4.04912	H1	promoter	ENSG00000171992	SYNPO	51.7668	59.2121	57.072	49.4941
1863	chr3	128205950	128206149	46.0262	133.417	50.1935	52.6516	4.64262	H1	intron	ENSG00000244300	RP11-475N22.4	5.17894	3.22045	3.0358	2.63516
1864	chrX	40035600	40035799	54.0307	116.912	57.1973	59.1318	3.66056	H1	intron	ENSG00000183337	BCOR	9.82052	14.3302	12.1359	17.0214
1865	chr10	70846950	70847149	70.0398	130.666	73.5393	75.3323	3.25965	H1	promoter	ENSG00000122862	SRGN	493.912	439.422	471.985	413.097
1866	chr12	123590850	123591049	42.0239	105.908	45.5244	47.7915	3.94615	H1	intron	ENSG00000090975	PITPNM2	6.84595	8.57937	10.3944	8.89572
1867	chr17	36982250	36982449	18.0102	56.3927	19.8439	21.8707	3.52971	H1	promoter	ENSG00000108296	CWC25	13.0852	12.3449	11.3873	9.92863
1868	chr1	16500850	16501049	18.0102	59.1435	19.8439	21.8707	3.70422	H1	intergenic	ENSG00000224621	RP11-276H7.3	0.2002	0.102419	0	0
1869	chr2	191207850	191208049	42.0239	138.918	45.5244	49.4115	4.98467	H1	promoter	ENSG00000138379	MSTN	0.0152668	0.0158705	0	0
1870	chr11	111473550	111473749	34.0193	105.908	36.186	39.6912	4.48153	H1	promoter	ENSG00000170145	SIK2	5.87602	5.73458	7.25967	9.50294
1871	chrX	40594300	40594499	38.0216	100.406	43.1898	44.5514	3.93204	H1	intron	ENSG00000180182	MED14	20.7632	25.7086	28.4222	30.9356
1872	chr17	46315350	46315549	6.00341	31.6349	8.17104	8.91028	3.40396	H1	intron	NA	NA	NA	NA	NA	NA
1873	chr19	14475000	14475199	2.00114	20.6315	3.50187	4.05013	3.34824	H1	intergenic	ENSG00000123146	CD97	4.01636	4.18899	3.21605	4.44653
1874	chr15	32982700	32982899	2.00114	20.6315	3.50187	4.05013	3.34824	H1	intron	ENSG00000166923	GREM1	0	0.0945821	0.236831	0.0167239
1875	chr8	23173700	23173899	110.063	232.448	120.231	125.554	4.4794	H1	intron	ENSG00000253837	RP11-177H13.2	0.696575	2.71032	1.12623	1.18713
1876	chr9	140189550	140189749	22.0125	127.915	31.5169	34.8311	5.50371	H1	intergenic	ENSG00000198435	NRARP	26.9988	38.2322	18.8139	37.2838
1877	chr16	57458700	57458899	6.00341	28.884	8.17104	8.91028	3.13036	H1	intergenic	ENSG00000088682	COQ9	22.9146	20.898	20.1663	18.4606
1878	chr8	99044800	99044999	2.00114	17.8806	3.50187	4.05013	2.99677	H1	intron	ENSG00000156482	RPL30	2247.34	1993.49	2479.72	1655.03
1879	chr12	26307550	26307749	2.00114	17.8806	3.50187	4.05013	2.99677	H1	intergenic	ENSG00000123096	SSPN	0.177244	0.501113	0.178973	0.0983119
1880	chr21	47010350	47010549	2.00114	17.8806	3.50187	4.05013	2.99677	H1	intergenic	ENSG00000233922	AL133493.2	0.0576018	0.713027	0	0
1881	chr4	169754000	169754199	22.0125	72.8978	24.5131	28.3509	3.97597	H1	intron	NA	NA	NA	NA	NA	NA
1882	chr17	48206850	48207049	2.00114	31.6349	3.50187	5.67018	4.20237	H1	intron	ENSG00000167100	SAMD14	4.13078	5.4476	4.78272	6.41539
1883	chr11	120081650	120081849	14.008	42.6383	15.1748	17.0105	3.0742	H1	promoter	ENSG00000184232	OAF	35.8685	31.7476	37.6677	36.6498
1884	chr12	6304400	6304599	38.0216	108.659	40.8552	46.1714	4.2772	H1	intergenic	ENSG00000010278	CD9	608.08	516.733	645.439	523.338
1885	chr3	184080150	184080349	23.3466	82.0674	26.8477	31.591	4.21801	H1	promoter	NA	NA	NA	NA	NA	NA
1886	chr20	42086950	42087149	6.00341	27.9671	7.39284	8.91028	3.08698	H1	promoter	ENSG00000124193	SRSF6	55.1812	65.3161	45.3023	56.9294
1887	chr14	75724650	75724849	22.0125	56.3927	24.5131	26.7308	2.99999	H1	intergenic	ENSG00000170345	FOS	0.993526	8.66835	1.71288	1.93684
1888	chr18	19284350	19284549	22.0125	56.3927	24.5131	26.7308	2.99999	H1	intron	ENSG00000158201	ABHD3	2.99369	2.80187	2.40699	3.20725
1889	chr8	145064700	145064899	30.0171	86.6521	33.8514	36.4511	3.93486	H1	promoter	ENSG00000178719	GRINA	89.3112	100.908	113.368	103.58
1890	chr16	4360200	4360399	22.0125	119.662	29.1823	33.211	5.37405	H1	intergenic	ENSG00000126603	GLIS2	5.29171	4.32516	5.94246	4.29272
1891	chr11	71935150	71935349	90.0512	196.687	96.8852	102.873	4.37956	H1	promoter	ENSG00000165458	INPPL1	112.939	108.902	111.974	124.131
1892	chr12	109125050	109125249	34.0193	111.41	38.5206	42.9313	4.56497	H1	intron	ENSG00000110880	CORO1C	304.542	297.256	281.986	172.559
1893	chr19	3684950	3685149	14.008	81.1504	38.5206	28.3509	4.36598	H1	intron	ENSG00000186111	PIP5K1C	17.2105	19.245	23.8187	19.4893
1894	chr5	172195550	172195749	12.4071	48.6902	25.4469	19.9266	3.20287	H1	promoter	ENSG00000120129	DUSP1	23.8993	190.549	47.023	32.917
1895	chr5	172315300	172315499	10.0057	59.1435	29.1823	21.8707	3.86751	H1	intron	ENSG00000113719	ERGIC1	157.466	156.364	165.849	152.004
1896	chr19	46195900	46196099	7.3375	37.1366	19.0658	14.3104	3.05749	H1	promoter	ENSG00000011478	QPCTL	8.63037	8.89649	8.42901	6.75456
1897	chr16	24680350	24680549	18.0102	59.1435	33.8514	28.3509	3.13316	H1	intergenic	ENSG00000090905	TNRC6A	23.1526	18.8207	21.2012	22.4073
1898	chr20	1429850	1430049	2.00114	28.884	12.8402	8.91028	3.30413	H1	intron	ENSG00000088833	NSFL1C	93.1218	77.5937	69.9927	56.0076
1899	chr1	65364500	65364699	42.0239	97.6556	64.201	52.6516	3.18056	H1	intron	ENSG00000162434	JAK1	78.8726	81.3757	96.6459	104.431
1900	chr10	105205250	105205449	34.0193	89.403	57.1973	46.1714	3.31688	H1	exon	ENSG00000234699	RP11-225H22.4	0	0.318453	0	0
1901	chr10	112256700	112256899	36.6875	96.7386	61.8664	49.4115	3.44828	H1	promoter	ENSG00000235874	RP11-525A16.1	0.457676	0.875629	0.404795	0.402258
1902	chr16	29828150	29828349	14.008	51.8079	29.1823	22.4107	3.16154	H1	promoter	ENSG00000013364	MVP	77.4748	67.0759	84.4732	62.1788
1903	chr2	74684800	74684999	58.033	158.175	99.2197	80.1925	4.22108	H1	exon	ENSG00000115274	INO80B	77.6891	75.3429	68.2118	53.6457
1904	chr6	41889350	41889549	46.0262	141.669	85.2122	67.2321	4.30601	H1	promoter	ENSG00000112578	BYSL	19.2805	18.6134	20.0444	14.9445
1905	chr9	123692400	123692599	2.00114	48.1401	22.1785	13.7704	4.15481	H1	intergenic	ENSG00000056558	TRAF1	0.852496	1.43836	2.316	0.773103
1906	chr12	88704050	88704249	6.00341	42.6383	22.1785	15.3905	3.48658	H1	intergenic	NA	NA	NA	NA	NA	NA
1907	chr20	4882200	4882399	2.00114	26.1332	12.8402	7.29023	3.15572	H1	intron	ENSG00000101265	RASSF2	24.1119	26.3238	22.4255	34.7762
1908	chr15	75917250	75917449	10.0057	42.6383	24.5131	17.0105	3.06613	H1	intron	ENSG00000169371	SNUPN	8.77507	8.60643	10.6069	8.02147
1909	chr17	57784150	57784349	14.008	64.6452	36.186	25.1108	3.75663	H1	promoter	ENSG00000062716	VMP1	51.8702	52.012	57.879	62.3347
1910	chr2	197238500	197238699	10.0057	48.1401	26.8477	18.6306	3.36547	H1	intron	NA	NA	NA	NA	NA	NA
1911	chr16	88700650	88700849	2.00114	31.6349	15.1748	8.91028	3.47542	H1	intergenic	ENSG00000124391	IL17C	0.0855608	0	0	0.0758431
1912	chr5	64330700	64330899	26.0148	81.1504	50.1935	36.4511	3.56445	H1	intergenic	NA	NA	NA	NA	NA	NA
1913	chrX	15353250	15353449	26.0148	94.9047	54.8627	38.0712	4.07847	H1	intron	ENSG00000165195	PIGA	3.71098	3.62278	9.50229	2.50619
1914	chrX	3733850	3734049	18.0102	56.3927	33.8514	23.4907	3.12672	H1	intergenic	ENSG00000205664	RP11-706O15.1	25.9559	19.6078	25.8058	21.1378
1915	chr8	134308650	134308849	26.0148	92.1538	54.8627	34.8311	4.05458	H1	intron	ENSG00000104419	NDRG1	37.3206	103.61	182.695	66.8421
1916	chr15	65176050	65176249	43.358	112.327	74.3175	54.8117	3.68369	H1	intergenic	ENSG00000166839	ANKDD1A	1.8318	1.32105	1.7121	1.97875
1917	chr2	54683000	54683199	90.0512	163.676	122.566	101.253	3.14174	H1	promoter	ENSG00000115306	SPTBN1	104.321	123.865	143.652	138.042
1918	chr1	936600	936799	6.00341	42.6383	24.5131	15.3905	3.46192	H1	intergenic	ENSG00000188290	HES4	2.80259	2.92009	4.15656	3.23478
1919	chr2	169312250	169312449	6.00341	53.6418	29.1823	18.6306	3.92642	H1	promoter	ENSG00000172292	CERS6	4.31499	3.83143	3.53097	3.1799
1920	chr3	101281250	101281449	14.008	53.6418	33.8514	25.1108	3.14928	H1	promoter	ENSG00000174173	RG9MTD1	30.3738	28.4342	25.6442	27.4335
1921	chr11	1330450	1330649	2.00114	28.884	15.1748	7.29023	3.35764	H1	intron	ENSG00000078902	TOLLIP	16.8224	16.9072	22.2622	15.4442
1922	chr2	237761050	237761249	14.008	51.8079	31.5169	21.8707	3.16081	H1	intergenic	NA	NA	NA	NA	NA	NA
1923	chr19	3444450	3444649	34.0193	92.1538	61.8664	47.7915	3.39223	H1	intron	ENSG00000095932	C19orf77	0.101646	0	0	0
1924	chr9	139940600	139940799	10.0057	50.8909	26.8477	13.7704	3.74965	H1	exon	ENSG00000107281	NPDC1	42.7034	36.8253	41.5272	44.1358
1925	chr20	53092150	53092349	2.00114	23.3823	10.5056	4.05013	3.218	H1	promoter	ENSG00000101134	DOK5	4.4952	4.07527	8.87881	3.17562
1926	chr7	25019600	25019799	26.0148	70.147	40.8552	29.9709	3.25246	H1	exon	ENSG00000070882	OSBPL3	21.8215	27.4115	36.3824	24.5126
1927	chr11	797150	797349	30.0171	75.6487	45.5244	33.211	3.23068	H1	intron	ENSG00000177542	SLC25A22	7.5284	7.34952	8.34953	6.24494
1928	chr6	27146350	27146549	7.3375	35.3027	17.5094	9.45029	3.21578	H1	intergenic	ENSG00000174572	RP11-209A2.1	0.0198873	0.206838	0	0.280827
1929	chr12	6251200	6251399	26.0148	67.3961	40.8552	29.9709	3.08187	H1	intergenic	ENSG00000110799	VWF	455.787	557.166	577.365	622.615
1930	chr5	150593000	150593199	2.00114	26.1332	10.5056	4.05013	3.48346	H1	intron	ENSG00000196743	GM2A	20.5095	19.1404	18.2275	15.9344
1931	chr9	97710950	97711149	2.00114	26.1332	10.5056	4.05013	3.48346	H1	intron	NA	NA	NA	NA	NA	NA
1932	chr6	135247350	135247549	10.0057	56.3927	26.8477	15.3905	3.98196	H1	intron	ENSG00000118514	ALDH8A1	0.179152	0.146216	0.56659	0.399649
1933	chr3	52089300	52089499	114.065	224.195	152.915	125.554	3.98662	H1	intron	ENSG00000164086	DUSP7	9.33853	8.88192	12.0931	12.2995
1934	chr12	125140950	125141149	26.0148	78.3995	45.5244	33.211	3.55346	H1	intergenic	ENSG00000196498	NCOR2	56.5258	60.4064	65.1262	39.9603
1935	chr3	179281000	179281199	6.00341	53.6418	24.5131	12.1504	4.21687	H1	promoter	ENSG00000136518	ACTL6A	181.988	161.201	172.64	165.036
1936	chr1	53793300	53793499	30.0171	83.9013	50.1935	36.4511	3.52547	H1	intron	ENSG00000157193	LRP8	17.2088	16.958	14.5069	16.5551
1937	chr19	45943200	45943399	38.0216	94.9047	59.5318	44.5514	3.44661	H1	intergenic	ENSG00000012061	ERCC1	54.8295	50.8741	44.7603	33.2669
1938	chr5	139723450	139723649	10.0057	48.1401	22.1785	18.6306	3.44553	H1	intron	ENSG00000113070	HBEGF	19.2935	118.744	62.0282	37.8702
1939	chr5	179234000	179234199	6.00341	42.6383	17.5094	13.7704	3.65181	H1	promoter	ENSG00000161011	SQSTM1	245.19	259.056	354.889	216.856
1940	chr19	56059900	56060099	6.00341	59.1435	22.1785	17.0105	4.34815	H1	intergenic	ENSG00000231274	AC008735.15	0.0712112	0.0368863	0	0.189532
1941	chr2	24583900	24584099	50.0284	111.41	68.8702	60.7519	3.31325	H1	intergenic	ENSG00000198399	ITSN2	22.5555	21.6803	22.9313	24.3938
1942	chr1	32687700	32687899	23.3466	76.5656	39.2988	32.671	3.66333	H1	intron	ENSG00000160055	TMEM234	16.5762	16.9996	21.9074	11.9674
1943	chr6	34240850	34241049	46.0262	108.659	64.201	55.8917	3.47727	H1	intergenic	ENSG00000225339	RP11-513I15.6	17.7245	18.499	18.0346	20.9132
1944	chr8	22551200	22551399	6.00341	32.5519	13.6184	10.5303	3.12074	H1	intergenic	ENSG00000008853	RHOBTB2	6.28738	6.06911	7.49945	6.07537
1945	chr10	21606050	21606249	2.00114	23.3823	8.17104	5.67018	3.17125	H1	intergenic	ENSG00000207264	RNU6-15	1.2116	0.777885	0	0
1946	chr8	92053000	92053199	10.0057	39.8875	19.8439	15.3905	2.99811	H1	exon	ENSG00000155099	TMEM55A	7.14098	7.42081	6.14093	4.46758
1947	chr2	88927750	88927949	126.072	229.697	157.584	141.754	3.6784	H1	intergenic	ENSG00000172071	EIF2AK3	17.9608	14.6951	24.6236	16.1518
1948	chr5	180287600	180287799	46.0262	97.6556	61.8664	54.2717	2.99293	H1	intron	ENSG00000196670	ZFP62	7.44367	5.47087	9.81457	10.5499
1949	chr7	2685150	2685349	30.0171	89.403	52.5281	39.6912	3.67734	H1	intron	ENSG00000136295	TTYH3	56.4411	61.0119	63.9273	68.5024
1950	chr6	3325350	3325549	142.081	284.714	194.938	167.675	4.28896	H1	intron	NA	NA	NA	NA	NA	NA
1951	chr12	52306300	52306499	138.078	248.953	178.596	156.335	3.70736	H1	promoter	ENSG00000139567	ACVRL1	98.3704	93.6015	83.1989	99.8446
1952	chr14	100705700	100705899	26.0148	81.1504	45.5244	34.8311	3.64289	H1	promoter	ENSG00000100811	YY1	53.7332	51.7265	51.8562	60.8718
1953	chr10	119134350	119134549	6.00341	45.3892	19.8439	12.1504	3.84593	H1	exon	ENSG00000165650	PDZD8	7.26736	7.13053	10.2694	9.09983
1954	chr3	33228050	33228249	22.0125	64.6452	36.186	28.3509	3.22707	H1	intron	ENSG00000173705	SUSD5	6.62035	6.97206	7.09048	5.94788
1955	chr5	149339650	149339849	134.076	232.448	166.923	148.235	3.47191	H1	promoter	ENSG00000113716	HMGXB3	23.2242	28.4334	24.3435	25.0796
1956	chr3	10216300	10216499	10.0057	56.3927	24.5131	15.3905	4.0195	H1	intron	ENSG00000134070	IRAK2	3.44665	4.66143	5.82232	5.89128
1957	chr16	70322650	70322849	46.0262	160.925	82.8777	59.1318	4.92253	H1	intron	ENSG00000090861	AARS	43.8331	37.7869	55.7993	42.4941
1958	chr19	54371400	54371599	6.00341	78.3995	29.1823	15.3905	5.00786	H1	promoter	ENSG00000232220	AC008440.5	125.931	242.806	243.66	200.579
1959	chr1	26603150	26603349	6.80387	33.2854	15.6417	10.2063	3.07284	H1	exon	ENSG00000142669	SH3BGRL3	278.637	260.612	279.894	244.748
1960	chr12	111843050	111843249	34.0193	182.932	82.8777	52.6516	5.64208	H1	promoter	ENSG00000111252	SH2B3	51.7168	50.4611	55.8273	49.8892
1961	chr12	57480650	57480849	23.6134	70.147	37.1199	29.9709	3.41419	H1	intergenic	ENSG00000166881	TMEM194A	10.8535	12.2957	16.1974	8.53214
1962	chr12	133343650	133343849	22.0125	83.9013	40.8552	29.9709	4.10572	H1	intergenic	NA	NA	NA	NA	NA	NA
1963	chr1	40915950	40916149	18.8107	71.7975	34.3184	25.4348	3.89808	H1	promoter	ENSG00000187801	ZNF643	1.36702	0.983794	2.20178	1.17059
1964	chr3	50206900	50207099	50.0284	185.683	89.8814	65.612	5.24209	H1	intron	ENSG00000235016	RP11-493K19.3	3.24581	4.26321	3.65493	1.53857
1965	chr13	50510150	50510349	50.0284	130.666	68.8702	63.992	4.0275	H1	intron	ENSG00000123178	SPRYD7	16.1848	11.814	13.9812	11.7233
1966	chr1	27925300	27925499	14.008	59.1435	24.5131	21.8707	3.74404	H1	intron	ENSG00000126705	AHDC1	7.54322	6.05606	11.6185	12.5257
1967	chr3	50208900	50209099	42.0239	136.168	64.201	57.5118	4.54515	H1	intron	ENSG00000235016	RP11-493K19.3	3.24581	4.26321	3.65493	1.53857
1968	chr1	36863350	36863549	26.0148	92.1538	40.8552	36.4511	4.15642	H1	exon	ENSG00000181817	LSM10	23.5951	18.2863	20.0941	18.4756
1969	chr12	57482100	57482299	30.8175	105.908	46.9251	41.6353	4.33636	H1	promoter	ENSG00000166881	TMEM194A	10.8535	12.2957	16.1974	8.53214
1970	chr1	210001850	210002049	26.0148	83.9013	38.5206	34.8311	3.87484	H1	promoter	ENSG00000117597	DIEXF	8.3118	11.7979	11.3753	9.30421
1971	chr4	7979850	7980049	14.008	72.8978	26.8477	21.8707	4.37525	H1	intron	ENSG00000196526	AFAP1	23.5854	21.2981	22.6014	19.4407
1972	chr20	50178900	50179099	12.6739	49.057	20.6221	17.5505	3.42601	H1	intron	ENSG00000101096	NFATC2	7.3576	9.85743	10.231	8.01699
1973	chr2	157190800	157190999	54.0307	163.676	78.2085	68.8521	4.73839	H1	intergenic	ENSG00000153234	NR4A2	0.446279	71.4582	3.80782	0.61682
1974	chr4	184579950	184580149	30.0171	89.403	43.1898	38.0712	3.82999	H1	promoter	ENSG00000182552	RWDD4	7.1471	6.67332	4.6015	8.96428
1975	chr9	90123400	90123599	2.00114	28.884	8.17104	5.67018	3.70379	H1	intron	ENSG00000196730	DAPK1	32.6861	31.0577	34.7252	30.4684
1976	chr17	7154900	7155099	14.008	50.8909	22.1785	18.6306	3.39076	H1	exon	ENSG00000175826	CTDNEP1	36.184	37.5929	39.3928	37.4399
1977	chr5	134734450	134734649	34.0193	94.9047	50.1935	44.5514	3.68762	H1	intron	ENSG00000069011	PITX1	0.529217	0.814695	1.1906	0.198814
1978	chr17	66251050	66251249	6.00341	39.8875	15.1748	12.1504	3.59775	H1	intron	ENSG00000141337	ARSG	2.53336	2.78058	3.60564	2.32347
1979	chr1	44173200	44173399	26.0148	94.9047	43.1898	38.0712	4.196	H1	promoter	ENSG00000066135	KDM4A	22.8645	22.4414	20.1713	19.5851
1980	chr8	141468050	141468249	18.0102	81.1504	33.8514	28.3509	4.27928	H1	intron	ENSG00000167632	TRAPPC9	6.98514	8.2819	10.3139	11.339
1981	chr3	4782700	4782899	26.8152	87.7525	42.2559	38.7192	3.87049	H1	intron	NA	NA	NA	NA	NA	NA
1982	chr14	23031150	23031349	14.008	92.1538	36.186	29.9709	4.74799	H1	intergenic	ENSG00000229164	TRAC	1.09212	1.8159	2.00826	2.27161
1983	chr17	80710450	80710649	10.0057	53.6418	22.1785	17.0105	3.85361	H1	promoter	ENSG00000141556	TBCD	15.8795	17.7912	15.0078	15.0812
1984	chr1	33430150	33430349	26.0148	81.1504	40.8552	34.8311	3.7029	H1	exon	ENSG00000116514	RNF19B	10.6494	10.4483	9.11985	6.03876
1985	chr7	134001200	134001399	26.0148	81.1504	40.8552	34.8311	3.7029	H1	intron	ENSG00000205060	SLC35B4	9.83747	10.2826	9.1595	7.80914
1986	chr4	153456600	153456799	14.008	64.6452	26.8477	21.8707	3.99055	H1	promoter	ENSG00000109670	FBXW7	5.365	6.56944	5.95431	6.59604
1987	chr8	28205750	28205949	34.0193	83.9013	47.0807	41.8513	3.24208	H1	exon	ENSG00000239198	RP11-380I10.1	23.9187	24.7215	18.3428	18.8793
1988	chr12	76421250	76421449	14.008	56.3927	24.5131	20.2506	3.63308	H1	exon	ENSG00000139289	PHLDA1	25.7619	39.8379	25.7915	38.4497
1989	chr16	81349050	81349249	14.008	56.3927	24.5131	20.2506	3.63308	H1	promoter	ENSG00000127688	GAN	1.08355	1.05905	1.27509	1.35022
1990	chrX	152127150	152127349	22.0125	78.3995	36.186	29.9709	3.92868	H1	intron	ENSG00000147394	ZNF185	17.9843	18.1565	12.7135	10.2574
1991	chr12	96628550	96628749	18.0102	92.1538	36.186	28.3509	4.65445	H1	intron	ENSG00000111145	ELK3	221.372	234.176	199.422	183.874
1992	chr17	31203650	31203849	46.0262	122.413	61.8664	54.2717	4.08819	H1	intron	ENSG00000176658	MYO1D	32.2183	37.4891	40.1219	71.1919
1993	chr20	47927950	47928149	2.00114	20.6315	5.83646	4.05013	3.14507	H1	intergenic	ENSG00000124201	ZNFX1	17.9825	12.2818	24.4421	22.1293
1994	chr19	50935400	50935599	2.00114	20.6315	5.83646	4.05013	3.14507	H1	promoter	ENSG00000086967	MYBPC2	0.021915	0.0228124	0	0
1995	chr8	134596950	134597149	2.00114	20.6315	5.83646	4.05013	3.14507	H1	intergenic	ENSG00000008513	ST3GAL1	39.3194	41.8822	55.2597	46.7503
1996	chr12	54763450	54763649	2.00114	20.6315	5.83646	4.05013	3.14507	H1	promoter	ENSG00000094916	CBX5	58.8328	55.1433	50.3114	42.7779
1997	chr2	220096050	220096249	2.00114	20.6315	5.83646	4.05013	3.14507	H1	intron	ENSG00000115661	STK16	31.3675	28.0708	28.8249	24.7492
1998	chr16	3558850	3559049	2.00114	20.6315	5.83646	4.05013	3.14507	H1	intron	ENSG00000103351	CLUAP1	16.8651	11.5578	13.0643	13.7251
1999	chr14	105948050	105948249	50.0284	147.171	68.8702	60.7519	4.58746	H1	intergenic	ENSG00000185347	C14orf80	6.2517	5.51091	5.3793	3.74168
[truncated: 10,405 more rows]

## Sheet: Zhang_ST_DE_dynamic_sites_and_n
Suppl. Table XXX. The table lists the genomic regions with the highest H3K27ac variance score (top 20%) and a nearby p300 site. These were grouped into 3 clusters (H1, H4-12, H0), as described in the text. The nearest gene within 100 kb is shown, and its expression profile over the VEGFA stimulation time course. NA indicates no gene within 100 kb.
