# Supplementary material for: A dynamic H3K27ac signature identifies VEGFA-stimulated endothelial enhancers and requires EP300 activity
Source: HighWire-hosted journal article supplement (doi:10.1101/gr.149674.112), 2013-04-01
Supplement: Zhang_ST-04_DE_Genes_to_Dynamic_sites.xlsx [file Zhang_ST-04_DE_Genes_to_Dynamic_sites.xlsx]

## Sheet: ST-04
Differentially Expressed Genes											Nearest H1 Site				Nearest H0 Site				Nearest H4-12 Site
Chr	Start	End	Width	Strand	Ensembl ID	HGNC ID	Hour 0 FPKM	Hour 1 FPKM	Hour 4 FPKM	Hour 12 FPKM	Chr	Start	End	Distance to TSS	Chr	Start	End	Distance to TSS	Chr	Start	End	Distance to TSS
chr16	3070312	3072384	2073	+	ENSG00000006327	TNFRSF12A	104.164	132.81	96.1892	53.5447	chr16	3071150	3071349	838	chr16	3022200	3022399	48112	NA	NA	NA	NA
chr1	169631244	169863408	232165	-	ENSG00000007908	SELE	0.675127	2.77032	7.30665	1.76727	NA	NA	NA	NA	NA	NA	NA	NA	NA	NA	NA	NA
chr6	143069579	143266338	196760	-	ENSG00000010818	HIVEP2	1.11341	1.25545	5.95483	5.9037	chr6	143175900	143176099	90438	chr6	143266300	143266499	38	chr6	143219200	143219399	47138
chrX	49028272	49042845	14574	-	ENSG00000012211	PRICKLE3	3.43322	1.67653	5.63825	4.02388	chrX	49028750	49028949	14095	chrX	48993450	48993649	49395	NA	NA	NA	NA
chr2	31456879	31492313	35435	+	ENSG00000013016	EHD3	3.34199	3.14731	6.74218	26.5902	NA	NA	NA	NA	NA	NA	NA	NA	chr2	31506200	31506399	49321
chr3	149235021	149454501	219481	-	ENSG00000018408	WWTR1	230.199	300.731	403.041	325.574	NA	NA	NA	NA	chr3	149470000	149470199	15499	NA	NA	NA	NA
chr11	118477154	118550399	73246	+	ENSG00000019144	PHLDB1	81.4874	115.956	131.878	106.457	chr11	118479000	118479199	1846	NA	NA	NA	NA	chr11	118444550	118444749	32604
chr14	55033814	55260033	226220	+	ENSG00000020577	SAMD4A	19.899	28.9981	40.6551	20.7484	chr14	55033600	55033799	214	chr14	54955450	54955649	78364	chr14	55118250	55118449	84436
chr20	34359895	34538303	178409	+	ENSG00000025293	PHF20	36.9113	22.8523	27.9161	22.3571	chr20	34329650	34329849	30245	NA	NA	NA	NA	NA	NA	NA	NA
chr11	35160416	35253949	93534	+	ENSG00000026508	CD44	137.918	108.612	108.063	68.63	chr11	35160950	35161149	534	NA	NA	NA	NA	NA	NA	NA	NA
chr14	61654276	62125414	471139	+	ENSG00000027075	PRKCH	78.3811	91.3993	130.441	92.8066	NA	NA	NA	NA	NA	NA	NA	NA	NA	NA	NA	NA
chr14	58765102	58862359	97258	+	ENSG00000032219	ARID4A	17.0723	8.83752	14.8922	19.5398	chr14	58764550	58764749	552	chr14	58862700	58862899	97598	NA	NA	NA	NA
chr3	27414213	27525911	111699	-	ENSG00000033867	SLC4A7	9.05784	13.3941	23.393	16.7296	NA	NA	NA	NA	NA	NA	NA	NA	chr3	27576950	27577149	51039
chr17	7138349	7142825	4477	-	ENSG00000040633	PHF23	25.3183	13.5583	27.1959	23.6167	chr17	7142600	7142799	225	NA	NA	NA	NA	NA	NA	NA	NA
chr9	127997131	128003622	6492	-	ENSG00000044574	HSPA5	258.955	301.412	584.997	335.222	NA	NA	NA	NA	NA	NA	NA	NA	NA	NA	NA	NA
chr7	18126571	19036993	910423	+	ENSG00000048052	HDAC9	10.3211	11.6302	64.4611	30.7921	NA	NA	NA	NA	chr7	18126300	18126499	271	chr7	18060300	18060499	66271
chr12	88885884	88974628	88745	-	ENSG00000049130	KITLG	26.8077	184.595	366.438	154.606	chr12	88973000	88973199	1628	NA	NA	NA	NA	NA	NA	NA	NA
chr18	55711618	56068772	357155	+	ENSG00000049759	NEDD4L	14.0588	17.8943	32.7907	37.7859	NA	NA	NA	NA	NA	NA	NA	NA	NA	NA	NA	NA
chr16	56965747	56977793	12047	+	ENSG00000051108	HERPUD1	24.7665	47.2532	97.7466	30.9722	chr16	56965650	56965849	97	NA	NA	NA	NA	chr16	57021100	57021299	55353
chr6	1610678	1614127	3450	+	ENSG00000054598	FOXC1	4.0347	11.3551	4.28508	6.53121	chr6	1604850	1605049	5828	NA	NA	NA	NA	NA	NA	NA	NA
chr9	123664670	123691451	26782	-	ENSG00000056558	TRAF1	0.852496	1.43836	2.316	0.773103	chr9	123692400	123692599	949	chr9	123677800	123677999	13651	chr9	123715700	123715899	24249
chr6	106534194	106557814	23621	+	ENSG00000057657	PRDM1	0.714713	1.13853	4.2703	6.11381	NA	NA	NA	NA	NA	NA	NA	NA	chr6	106533550	106533749	644
chr12	94960899	95044338	83440	-	ENSG00000057704	TMCC3	10.54	17.8593	7.52402	11.7893	NA	NA	NA	NA	chr12	95084800	95084999	40462	NA	NA	NA	NA
chr12	7917811	8250367	332557	-	ENSG00000059804	SLC2A3	10.5387	30.8173	14.7491	27.0421	NA	NA	NA	NA	NA	NA	NA	NA	chr12	8309350	8309549	58983
chr4	156680143	156728743	48601	+	ENSG00000061918	GUCY1B3	2.02725	1.66451	3.90402	1.61492	chr4	156588950	156589149	91193	NA	NA	NA	NA	NA	NA	NA	NA
chr5	127419457	127525380	105924	+	ENSG00000064651	SLC12A2	31.0865	44.1912	114.504	60.6673	NA	NA	NA	NA	chr5	127418850	127419049	607	chr5	127374200	127374399	45257
chr2	187866602	188430487	563886	-	ENSG00000064989	CALCRL	113.387	125.234	199.84	170.585	NA	NA	NA	NA	NA	NA	NA	NA	NA	NA	NA	NA
chr16	2076887	2089026	12140	+	ENSG00000065054	SLC9A3R2	17.5006	17.2324	34.8786	26.9725	chr16	2081850	2082049	4963	chr16	2014700	2014899	62187	NA	NA	NA	NA
chr5	54603587	54830878	227292	-	ENSG00000067113	PPAP2A	13.5746	10.9406	25.6473	16.1749	NA	NA	NA	NA	NA	NA	NA	NA	NA	NA	NA	NA
chrX	48334540	48344752	10213	+	ENSG00000068438	FTSJ1	42.9411	31.682	50.092	28.1624	NA	NA	NA	NA	NA	NA	NA	NA	NA	NA	NA	NA
chr15	56119119	56285835	166717	-	ENSG00000069869	NEDD4	21.2842	13.7376	38.542	18.8317	chr15	56285500	56285699	335	NA	NA	NA	NA	NA	NA	NA	NA
chr17	2287353	2304412	17060	-	ENSG00000070444	MNT	5.61632	11.1886	7.16616	5.64669	chr17	2304650	2304849	238	chr17	2356300	2356499	51888	NA	NA	NA	NA
chr12	89954905	90103077	148173	-	ENSG00000070961	ATP2B1	24.7419	28.925	50.9822	39.1467	chr12	90103650	90103849	573	NA	NA	NA	NA	NA	NA	NA	NA
chr2	12857014	12882860	25847	+	ENSG00000071575	TRIB2	11.0641	25.5618	7.74055	8.58671	chr2	12857050	12857249	36	NA	NA	NA	NA	chr2	12805050	12805249	51964
chr1	186640922	186649559	8638	-	ENSG00000073756	PTGS2	5.59635	176.096	26.1425	2.88101	NA	NA	NA	NA	NA	NA	NA	NA	NA	NA	NA	NA
chr1	8921060	8939953	18894	-	ENSG00000074800	ENO1	1817.08	1438.72	1695.17	1024.1	chr1	8938400	8938599	1553	chr1	8917800	8917999	22153	NA	NA	NA	NA
chr1	178060642	178448644	388003	+	ENSG00000075391	RASAL2	8.18675	11.9602	5.04623	10.8069	NA	NA	NA	NA	NA	NA	NA	NA	chr1	178022450	178022649	38192
chr2	28607275	28640179	32905	+	ENSG00000075426	FOSL2	25.0556	69.9562	27.9853	26.6844	chr2	28616000	28616199	8725	NA	NA	NA	NA	NA	NA	NA	NA
chr1	21922707	21995856	73150	-	ENSG00000076864	RAP1GAP	0.0182177	0.677237	0.0220866	0	chr1	21912900	21913099	82956	NA	NA	NA	NA	NA	NA	NA	NA
chr2	234263152	234380750	117599	+	ENSG00000077044	DGKD	6.53495	24.0773	15.5465	17.6707	NA	NA	NA	NA	NA	NA	NA	NA	chr2	234329100	234329299	65948
chr6	158402887	158520208	117322	+	ENSG00000078269	SYNJ2	17.5078	21.5241	25.4168	10.7212	chr6	158403300	158403499	413	chr6	158462050	158462249	59163	NA	NA	NA	NA
chr8	92967202	93115514	148313	-	ENSG00000079102	RUNX1T1	8.51253	11.1494	4.34472	8.79504	NA	NA	NA	NA	NA	NA	NA	NA	chr8	93116100	93116299	586
chrX	107068984	107179210	110227	+	ENSG00000080561	MID2	14.6511	15.4226	7.13643	9.07897	NA	NA	NA	NA	chrX	107069650	107069849	666	NA	NA	NA	NA
chr5	113696665	114004107	307443	+	ENSG00000080709	KCNN2	0.460125	0.555036	3.98002	2.48545	NA	NA	NA	NA	NA	NA	NA	NA	NA	NA	NA	NA
chr14	73603125	73690399	87275	+	ENSG00000080815	PSEN1	50.958	42.5183	64.696	47.8663	chr14	73694600	73694799	91475	NA	NA	NA	NA	NA	NA	NA	NA
chr4	74962792	74965010	2219	-	ENSG00000081041	CXCL2	1.95648	29.0631	2.65065	1.61466	NA	NA	NA	NA	NA	NA	NA	NA	chr4	74976050	74976249	11040
chr5	87803362	88762215	958854	-	ENSG00000081189	MEF2C	78.537	87.2345	269.183	167.966	NA	NA	NA	NA	NA	NA	NA	NA	NA	NA	NA	NA
chr2	201542955	201688569	145615	+	ENSG00000082153	BZW1	1055.63	1102.27	1132.22	659.705	NA	NA	NA	NA	NA	NA	NA	NA	NA	NA	NA	NA
chr12	96366439	96390143	23705	-	ENSG00000084110	HAL	0.0100357	1.0205	0.238919	0.0317818	NA	NA	NA	NA	NA	NA	NA	NA	NA	NA	NA	NA
chr2	224720432	224810104	89673	-	ENSG00000085449	WDFY1	40.827	35.0321	63.2335	33.5045	chr2	224809550	224809749	554	NA	NA	NA	NA	NA	NA	NA	NA
chr4	140586921	141075338	488418	+	ENSG00000085871	MGST2	127.659	120.344	135.309	231.321	chr4	140686800	140686999	99879	NA	NA	NA	NA	chr4	140684250	140684449	97329
chr16	82068865	82132139	63275	+	ENSG00000086696	HSD17B2	1.40462	1.58074	1.78887	11.7802	NA	NA	NA	NA	NA	NA	NA	NA	chr16	82071450	82071649	2585
chr14	52471520	52536545	65026	-	ENSG00000087303	NID2	33.5155	33.6784	67.9852	73.0832	NA	NA	NA	NA	NA	NA	NA	NA	NA	NA	NA	NA
chr20	57393973	57486247	92275	+	ENSG00000087460	GNAS	777.529	801.545	850.471	1179.54	NA	NA	NA	NA	NA	NA	NA	NA	chr20	57482550	57482749	88577
chr20	54944444	54967393	22950	-	ENSG00000087586	AURKA	44.0875	29.0501	36.3391	19.5839	NA	NA	NA	NA	NA	NA	NA	NA	chr20	54993900	54994099	26507
chr16	31191444	31203127	11684	+	ENSG00000089280	FUS	728.527	824.394	820.836	526.126	NA	NA	NA	NA	NA	NA	NA	NA	NA	NA	NA	NA
chr3	189674516	189862635	188120	-	ENSG00000090530	LEPREL1	3.79975	5.53293	14.8125	11.1652	NA	NA	NA	NA	NA	NA	NA	NA	NA	NA	NA	NA
chr19	39903224	39919054	15831	+	ENSG00000090924	PLEKHG2	13.4605	26.3741	17.1339	17.4712	chr19	39903950	39904149	726	NA	NA	NA	NA	NA	NA	NA	NA
chr12	76745576	76953589	208014	-	ENSG00000091039	OSBPL8	32.8982	15.0572	30.0799	30.9669	chr12	76952950	76953149	639	NA	NA	NA	NA	NA	NA	NA	NA
chr2	173292081	173489823	197743	+	ENSG00000091409	ITGA6	133.108	137.895	175.535	289.597	NA	NA	NA	NA	NA	NA	NA	NA	chr2	173269950	173270149	22131
chr2	173541868	173917621	375754	+	ENSG00000091428	RAPGEF4	5.34517	5.38808	14.7458	7.48761	NA	NA	NA	NA	NA	NA	NA	NA	chr2	173608800	173608999	66932
chr3	133292573	133309105	16533	+	ENSG00000091527	CDV3	149.407	170.372	165.49	117.589	NA	NA	NA	NA	chr3	133215650	133215849	76923	chr3	133290100	133290299	2473
chr8	6261071	6565730	304660	-	ENSG00000091879	ANGPT2	24.3102	29.0283	67.7433	95.9764	NA	NA	NA	NA	NA	NA	NA	NA	chr8	6591750	6591949	26020
chr3	112051914	112081659	29746	+	ENSG00000091972	CD200	9.5747	19.4025	31.783	20.8345	NA	NA	NA	NA	NA	NA	NA	NA	chr3	112051300	112051499	614
chr14	21927178	21979517	52340	+	ENSG00000092203	TOX4	64.3075	74.3051	70.9121	41.0143	chr14	21944800	21944999	17622	chr14	21936450	21936649	9272	NA	NA	NA	NA
chr10	101989423	102027437	38015	-	ENSG00000095485	CWF19L1	60.9874	84.5667	30.521	36.0736	chr10	102046300	102046499	18863	chr10	102118550	102118749	91113	NA	NA	NA	NA
chr10	35386933	35501886	114954	+	ENSG00000095794	CREM	42.4791	98.338	107.61	43.1659	chr10	35416400	35416599	29467	chr10	35346350	35346549	40583	NA	NA	NA	NA
chr10	70042416	70167051	124636	+	ENSG00000096746	HNRNPH3	358.618	302.117	322.377	208.09	NA	NA	NA	NA	chr10	70092250	70092449	49834	chr10	69945100	69945299	97316
chr10	71211228	71267425	56198	+	ENSG00000099282	TSPAN15	94.5872	103.827	71.6356	127.877	NA	NA	NA	NA	NA	NA	NA	NA	chr10	71207200	71207399	4028
chr19	38826414	38861589	35176	+	ENSG00000099338	CATSPERG	0.447873	1.24349	0.148274	0.523573	chr19	38880950	38881149	54536	chr19	38741950	38742149	84464	NA	NA	NA	NA
chr22	21061978	21245502	183525	+	ENSG00000099937	SERPIND1	4.59928	3.72252	3.73816	1.06292	chr22	21137600	21137799	75622	NA	NA	NA	NA	NA	NA	NA	NA
chr22	29190542	29196585	6044	-	ENSG00000100219	XBP1	49.5921	74.4178	82.2654	63.6488	chr22	29168750	29168949	27835	NA	NA	NA	NA	chr22	29107950	29108149	88635
chr14	20923349	20929771	6423	+	ENSG00000100823	APEX1	427.422	393.406	439.859	297.136	NA	NA	NA	NA	NA	NA	NA	NA	chr14	20967650	20967849	44301
chr14	35870716	35873955	3240	-	ENSG00000100906	NFKBIA	25.3565	47.1388	34.8999	27.5524	chr14	35874000	35874199	45	chr14	35883450	35883649	9495	chr14	35870900	35871099	3055
chr20	53092135	53267710	175576	+	ENSG00000101134	DOK5	4.4952	4.07527	8.87881	3.17562	chr20	53092150	53092349	15	NA	NA	NA	NA	NA	NA	NA	NA
chr13	49550047	49783888	233842	+	ENSG00000102531	FNDC3A	28.9577	27.8465	56.1727	37.994	chr13	49549750	49549949	297	chr13	49568600	49568799	18553	chr13	49465600	49465799	84447
chr13	73629113	73651676	22564	+	ENSG00000102554	KLF5	2.05659	12.4473	2.55678	3.46333	NA	NA	NA	NA	NA	NA	NA	NA	NA	NA	NA	NA
chr13	28874488	29069265	194778	-	ENSG00000102755	FLT1	48.5642	58.3256	99.982	99.0147	NA	NA	NA	NA	chr13	29025700	29025899	43565	chr13	29067550	29067749	1715
chr15	81071683	81282219	210537	+	ENSG00000103888	KIAA1199	0.432204	0.0111031	1.71718	0.297343	chr15	80988300	80988499	83383	NA	NA	NA	NA	NA	NA	NA	NA
chr8	134249413	134314265	64853	-	ENSG00000104419	NDRG1	37.3206	103.61	182.695	66.8421	chr8	134308650	134308849	5615	NA	NA	NA	NA	chr8	134403050	134403249	88785
chr8	102698770	103137135	438366	-	ENSG00000104490	NCALD	0.253508	0.0753428	0.106104	2.05418	NA	NA	NA	NA	NA	NA	NA	NA	NA	NA	NA	NA
chr8	22224761	22291642	66882	+	ENSG00000104635	SLC39A14	35.8527	37.4589	87.3084	46.2863	chr8	22242200	22242399	17439	NA	NA	NA	NA	NA	NA	NA	NA
chr19	58053207	58071231	18025	-	ENSG00000105132	ZNF550	1.25289	1.04663	2.75452	2.04787	chr19	58125600	58125799	54369	NA	NA	NA	NA	NA	NA	NA	NA
chr7	93220884	93540577	319694	-	ENSG00000105825	TFPI2	91.8293	96.521	318.549	592.337	NA	NA	NA	NA	NA	NA	NA	NA	chr7	93540200	93540399	377
chr7	20370324	20450419	80096	+	ENSG00000105855	ITGB8	1.53191	2.50657	3.00367	0.923137	chr7	20369900	20370099	424	NA	NA	NA	NA	NA	NA	NA	NA
chr7	116164838	116201233	36396	+	ENSG00000105974	CAV1	2231.4	2403.66	3314.27	1833.48	chr7	116165400	116165599	562	chr7	116109150	116109349	55688	chr7	116164150	116164349	688
chr7	100136833	100165842	29010	+	ENSG00000106351	AGFG2	12.4128	14.6322	10.4589	19.8742	chr7	100183000	100183199	46167	chr7	100145300	100145499	8467	NA	NA	NA	NA
chr7	11013498	11209250	195753	+	ENSG00000106443	PHF14	20.7789	18.0947	14.6605	24.3404	NA	NA	NA	NA	NA	NA	NA	NA	NA	NA	NA	NA
chr7	44154285	44163957	9673	-	ENSG00000106628	POLD2	124.78	110.111	111.947	62.0246	chr7	44084450	44084649	79507	NA	NA	NA	NA	NA	NA	NA	NA
chr9	134452156	134615461	163306	-	ENSG00000107263	RAPGEF1	54.1752	62.2193	95.2091	95.2159	chr9	134609600	134609799	5861	chr9	134574000	134574199	41461	chr9	134553600	134553799	61861
chr10	124134172	124191867	57696	+	ENSG00000107679	PLEKHA1	22.3813	28.4787	44.3337	38.6906	chr10	124133750	124133949	422	chr10	124040850	124041049	93322	NA	NA	NA	NA
chr10	30722865	30750762	27898	+	ENSG00000107968	MAP3K8	2.41396	10.459	7.13683	3.12238	NA	NA	NA	NA	NA	NA	NA	NA	NA	NA	NA	NA
chr10	54074055	54077802	3748	+	ENSG00000107984	DKK1	59.1698	52.2769	26.2572	13.923	NA	NA	NA	NA	NA	NA	NA	NA	NA	NA	NA	NA
chr10	131633546	131762538	128993	-	ENSG00000108001	EBF3	0.75002	0.979573	0.235635	2.04802	NA	NA	NA	NA	NA	NA	NA	NA	NA	NA	NA	NA
chr17	17397750	17399707	1958	-	ENSG00000108551	RASD1	3.59722	4.20514	14.5064	14.9847	chr17	17494800	17494999	95093	NA	NA	NA	NA	chr17	17320650	17320849	79057
chr17	32582312	32584222	1911	+	ENSG00000108691	CCL2	433.351	822.364	327.942	280.75	chr17	32583400	32583599	1088	chr17	32565200	32565399	17112	NA	NA	NA	NA
chr4	103422485	103538459	115975	+	ENSG00000109320	NFKB1	18.7624	18.5072	32.7105	20.0564	chr4	103422800	103422999	315	NA	NA	NA	NA	NA	NA	NA	NA
chr4	7060632	7069924	9293	-	ENSG00000109519	GRPEL1	56.8425	42.5449	78.5761	43.2821	NA	NA	NA	NA	NA	NA	NA	NA	NA	NA	NA	NA
chr4	154073493	154260472	186980	+	ENSG00000109654	TRIM2	7.8073	7.77116	17.3209	13.2955	NA	NA	NA	NA	NA	NA	NA	NA	chr4	154146500	154146699	73007
chr4	39500374	39640710	140337	-	ENSG00000109814	UGDH	62.4025	63.9817	107.547	65.1803	NA	NA	NA	NA	NA	NA	NA	NA	chr4	39638400	39638599	2310
chr11	122928196	122933938	5743	-	ENSG00000109971	HSPA8	2014.92	1383.83	1418.95	1640.7	NA	NA	NA	NA	chr11	122933000	122933199	938	chr11	122934450	122934649	512
chr11	59341870	59383617	41748	-	ENSG00000110048	OSBP	18.0524	15.8951	27.0069	21.7043	chr11	59383000	59383199	617	NA	NA	NA	NA	chr11	59474050	59474249	90433
chr11	3686816	3847601	160786	-	ENSG00000110713	NUP98	79.1949	72.1101	103.555	59.2421	NA	NA	NA	NA	chr11	3906950	3907149	59349	NA	NA	NA	NA
chr12	109038884	109125372	86489	-	ENSG00000110880	CORO1C	304.542	297.256	281.986	172.559	chr12	109125050	109125249	322	chr12	109086050	109086249	39322	chr12	109094250	109094449	31122
chr12	51373183	51422349	49167	-	ENSG00000110911	SLC11A2	25.7182	23.5347	30.2797	15.3078	chr12	51419800	51419999	2549	NA	NA	NA	NA	chr12	51378750	51378949	43599
chr12	123636866	123756881	120016	-	ENSG00000111328	CDK2AP1	122.816	121.176	122.205	195.891	chr12	123751800	123751999	5081	chr12	123849500	123849699	92619	chr12	123762900	123763099	6019
chr12	14956505	15059520	103016	-	ENSG00000111341	MGP	253.661	271.654	492.888	663.275	NA	NA	NA	NA	NA	NA	NA	NA	chr12	15057450	15057649	2070
chr12	6643092	6647537	4446	+	ENSG00000111640	GAPDH	3307.9	2636.57	3310.01	2068.22	chr12	6643700	6643899	608	NA	NA	NA	NA	NA	NA	NA	NA
chr12	6949117	6961230	12114	-	ENSG00000111665	CDCA3	37.9298	32.657	32.5265	14.3295	chr12	6937550	6937749	23680	chr12	7037700	7037899	76470	NA	NA	NA	NA
chr12	104458234	104498639	40406	+	ENSG00000111727	HCFC2	6.72533	2.38641	5.67562	6.34192	chr12	104458400	104458599	166	chr12	104405650	104405849	52584	chr12	104530400	104530599	72166
chr6	75794041	75915767	121727	-	ENSG00000111799	COL12A1	42.7929	53.2079	63.0746	90.681	NA	NA	NA	NA	chr6	75993650	75993849	77883	NA	NA	NA	NA
chr6	11173684	11382581	208898	-	ENSG00000111859	NEDD9	22.5356	99.691	56.6772	37.7172	chr6	11317700	11317899	64881	chr6	11368450	11368649	14131	chr6	11365650	11365849	16931
chr6	118781934	119031238	249305	-	ENSG00000111860	C6orf204	0.99837	5.39284	2.11449	2.37628	NA	NA	NA	NA	NA	NA	NA	NA	NA	NA	NA	NA
chr6	14117871	14137149	19279	+	ENSG00000112149	CD83	0.163211	1.44259	2.32565	0.957871	NA	NA	NA	NA	NA	NA	NA	NA	NA	NA	NA	NA
chr6	90636247	91006627	370381	-	ENSG00000112182	BACH2	0.511507	0.304337	3.80728	0.896417	NA	NA	NA	NA	chr6	91006700	91006899	73	chr6	90926750	90926949	79877
chr6	142622990	142767403	144414	+	ENSG00000112414	GPR126	59.2136	61.7972	34.1749	27.3578	NA	NA	NA	NA	chr6	142622800	142622999	190	chr6	142696100	142696299	73110
chr6	44187241	44201888	14648	+	ENSG00000112759	SLC29A1	111.722	101.341	90.6275	123.74	chr6	44214250	44214449	27009	chr6	44227550	44227749	40309	chr6	44186650	44186849	591
chr5	43289496	43313614	24119	-	ENSG00000112972	HMGCS1	105.975	106.778	169.934	140.04	NA	NA	NA	NA	NA	NA	NA	NA	NA	NA	NA	NA
chr5	139554226	139682706	128481	-	ENSG00000113068	PFDN1	389.956	304.841	447.623	216.66	chr5	139702600	139702799	19894	NA	NA	NA	NA	chr5	139645000	139645199	37706
chr5	139712427	139726216	13790	-	ENSG00000113070	HBEGF	19.2935	118.744	62.0282	37.8702	chr5	139724250	139724449	1966	NA	NA	NA	NA	chr5	139645000	139645199	81216
chr5	74615979	74657929	41951	+	ENSG00000113161	HMGCR	174.401	143.716	309.227	200.924	chr5	74633100	74633299	17121	NA	NA	NA	NA	chr5	74631900	74632099	15921
chr5	148871759	148931007	59249	-	ENSG00000113712	CSNK1A1	107.012	101.219	148.949	143.234	NA	NA	NA	NA	NA	NA	NA	NA	chr5	148931650	148931849	643
chr5	149493399	149535435	42037	-	ENSG00000113721	PDGFRB	0.167903	0.559394	1.05218	0.0327284	NA	NA	NA	NA	NA	NA	NA	NA	NA	NA	NA	NA
chr5	172741715	172756506	14792	-	ENSG00000113739	STC2	20.2761	22.7765	21.7865	4.33354	chr5	172756250	172756449	256	NA	NA	NA	NA	NA	NA	NA	NA
chr5	173315282	173388979	73698	+	ENSG00000113742	CPEB4	5.79456	16.1114	14.8962	5.14298	chr5	173315700	173315899	418	NA	NA	NA	NA	chr5	173347350	173347549	32068
chr5	176883608	176901402	17795	-	ENSG00000113758	DBN1	130.366	127.085	133.333	95.1417	chr5	176889100	176889299	12302	chr5	176920500	176920699	19098	NA	NA	NA	NA
chr3	187416046	187463515	47470	-	ENSG00000113916	BCL6	4.08249	23.3377	8.72072	7.50858	chr3	187462700	187462899	815	NA	NA	NA	NA	NA	NA	NA	NA
chr3	134070693	134094321	23629	-	ENSG00000114019	AMOTL2	70.425	118.145	74.5763	60.0581	NA	NA	NA	NA	chr3	134092450	134092649	1871	NA	NA	NA	NA
chr3	193853933	193856521	2589	+	ENSG00000114315	HES1	92.0888	129.129	50.1923	117.468	chr3	193855300	193855499	1367	chr3	193859650	193859849	5717	chr3	193856450	193856649	2517
chr3	105374304	105588396	214093	-	ENSG00000114423	CBLB	15.5501	12.2063	22.5949	15.2198	NA	NA	NA	NA	chr3	105587450	105587649	946	chr3	105604000	105604199	15604
chr3	81538849	81811312	272464	-	ENSG00000114480	GBE1	45.3762	47.0533	75.3	56.3357	NA	NA	NA	NA	chr3	81810800	81810999	512	chr3	81794350	81794549	16962
chr2	113531491	113542167	10677	-	ENSG00000115008	IL1A	0.326696	3.45519	0.57481	0.512483	chr2	113570150	113570349	27983	chr2	113638650	113638849	96483	chr2	113541550	113541749	617
chr2	232318241	232348352	30112	-	ENSG00000115053	NCL	413.175	396.625	426.702	305.469	chr2	232328650	232328849	19702	NA	NA	NA	NA	NA	NA	NA	NA
chr2	62900985	63275775	374791	+	ENSG00000115504	EHBP1	24.0863	20.9453	10.4697	16.5617	NA	NA	NA	NA	NA	NA	NA	NA	NA	NA	NA	NA
chr2	102927961	103015218	87258	+	ENSG00000115602	IL1RL1	28.6422	22.5047	17.6983	6.73861	NA	NA	NA	NA	chr2	102867100	102867299	60861	NA	NA	NA	NA
chr2	105974168	106054960	80793	-	ENSG00000115641	FHL2	127.806	130.821	105.87	72.0373	NA	NA	NA	NA	chr2	106014850	106015049	40110	NA	NA	NA	NA
chr2	151324708	151395525	70818	-	ENSG00000115963	RND3	65.3094	127.976	63.6521	47.6406	chr2	151342800	151342999	52725	NA	NA	NA	NA	chr2	151338200	151338399	57325
chr2	70377011	70475792	98782	-	ENSG00000116001	TIA1	157.798	114.831	140.336	126.893	NA	NA	NA	NA	NA	NA	NA	NA	NA	NA	NA	NA
chr1	178694299	179067158	372860	+	ENSG00000116191	RALGPS2	18.8982	20.3062	10.3805	14.1749	NA	NA	NA	NA	NA	NA	NA	NA	NA	NA	NA	NA
chr1	155916644	155976861	60218	-	ENSG00000116584	ARHGEF2	80.9504	51.4051	74.4079	89.1558	chr1	155947850	155948049	29011	NA	NA	NA	NA	chr1	155880050	155880249	96811
chr1	156433518	156470620	37103	-	ENSG00000116604	MEF2D	15.5807	24.0682	21.745	24.4488	chr1	156463000	156463199	7620	chr1	156470150	156470349	470	NA	NA	NA	NA
chr1	185265519	185286461	20943	-	ENSG00000116679	IVNS1ABP	29.6147	68.0228	51.5948	66.7047	chr1	185285950	185286149	511	NA	NA	NA	NA	NA	NA	NA	NA
chr1	192778168	192781403	3236	+	ENSG00000116741	RGS2	6.74129	23.5075	7.35302	5.68879	chr1	192777650	192777849	518	NA	NA	NA	NA	NA	NA	NA	NA
chr1	81771844	82458107	686264	+	ENSG00000117114	LPHN2	49.0949	50.8722	84.0542	107.392	NA	NA	NA	NA	NA	NA	NA	NA	NA	NA	NA	NA
chr1	163038564	163046592	8029	+	ENSG00000117152	RGS4	47.3092	40.5743	35.3351	12.902	NA	NA	NA	NA	NA	NA	NA	NA	chr1	162955650	162955849	82914
chr1	145438468	145442635	4168	+	ENSG00000117289	TXNIP	16.6477	4.33523	9.53659	13.6717	chr1	145477100	145477299	38632	chr1	145382500	145382699	55968	NA	NA	NA	NA
chr1	94994780	95007356	12577	-	ENSG00000117525	F3	0.237935	20.6619	5.49789	2.04956	NA	NA	NA	NA	NA	NA	NA	NA	NA	NA	NA	NA
chr1	25568739	25594376	25638	-	ENSG00000117616	C1orf63	34.6877	19.9617	52.1374	53.2652	chr1	25664900	25665099	70524	chr1	25573350	25573549	21026	NA	NA	NA	NA
chr1	26758772	26797785	39014	+	ENSG00000117682	DHDDS	45.8051	45.8881	72.9555	46.7545	NA	NA	NA	NA	NA	NA	NA	NA	chr1	26759600	26759799	828
chr1	213992977	214214853	221877	+	ENSG00000117707	PROX1	0.56793	2.77595	1.95888	1.22082	NA	NA	NA	NA	NA	NA	NA	NA	NA	NA	NA	NA
chr2	207938860	208031991	93132	-	ENSG00000118263	KLF7	25.6471	37.0345	21.4869	20.2276	NA	NA	NA	NA	chr2	208031400	208031599	591	chr2	208022450	208022649	9541
chr6	75994729	76203496	208768	-	ENSG00000118407	FILIP1	4.85268	3.53999	0.769884	2.64238	NA	NA	NA	NA	chr6	76234800	76234999	31304	chr6	76209150	76209349	5654
chr6	138178422	138204449	26028	+	ENSG00000118503	TNFAIP3	5.00046	18.5065	9.7488	6.57536	NA	NA	NA	NA	NA	NA	NA	NA	NA	NA	NA	NA
chr6	134490383	134639250	148868	-	ENSG00000118515	SGK1	115.86	317.435	79.3879	38.9307	chr6	134617900	134618099	21350	NA	NA	NA	NA	NA	NA	NA	NA
chr13	58205943	58303445	97503	+	ENSG00000118946	PCDH17	1.41323	3.70975	4.67136	5.08499	NA	NA	NA	NA	NA	NA	NA	NA	NA	NA	NA	NA
chr5	95220801	96143803	923003	-	ENSG00000118985	ELL2	6.65623	16.5396	19.2001	5.81204	NA	NA	NA	NA	chr5	96117500	96117699	26303	NA	NA	NA	NA
chr9	123617975	123639606	21632	-	ENSG00000119403	PHF19	61.9671	54.4435	60.7384	30.2789	chr9	123638350	123638549	1256	chr9	123639350	123639549	256	chr9	123609750	123609949	29856
chr9	102584136	102629173	45038	+	ENSG00000119508	NR4A3	0.0312274	34.2863	1.86373	0.708496	chr9	102582750	102582949	1386	NA	NA	NA	NA	NA	NA	NA	NA
chr5	172185228	172204777	19550	-	ENSG00000120129	DUSP1	23.8993	190.549	47.023	32.917	chr5	172198950	172199149	5827	NA	NA	NA	NA	NA	NA	NA	NA
chr6	150045450	150132556	87107	-	ENSG00000120253	NUP43	36.1444	23.0648	26.7967	20.855	chr6	150039300	150039499	93256	NA	NA	NA	NA	chr6	150176850	150177049	44294
chr5	137801168	137805004	3837	+	ENSG00000120738	EGR1	2.64489	102.501	6.58365	9.15968	chr5	137878200	137878399	77032	NA	NA	NA	NA	NA	NA	NA	NA
chr3	172223297	172241297	18001	-	ENSG00000121858	TNFSF10	66.1847	57.6022	25.9756	34.1067	chr3	172324950	172325149	83653	NA	NA	NA	NA	chr3	172230650	172230849	10647
chr2	136871918	136875735	3818	-	ENSG00000121966	CXCR4	63.6571	45.6367	90.8219	256.002	NA	NA	NA	NA	NA	NA	NA	NA	chr2	136876650	136876849	915
chr7	41706765	41818986	112222	-	ENSG00000122641	INHBA	8.4346	11.5621	5.95583	13.285	NA	NA	NA	NA	NA	NA	NA	NA	NA	NA	NA	NA
chr7	134429002	134655479	226478	+	ENSG00000122786	CALD1	1580.67	1183.98	3159.6	1608.59	NA	NA	NA	NA	chr7	134488500	134488699	59498	chr7	134465450	134465649	36448
chr10	75668934	75682535	13602	+	ENSG00000122861	PLAU	25.9097	40.2647	28.4956	26.7741	chr10	75668100	75668299	834	chr10	75660400	75660599	8534	NA	NA	NA	NA
chr10	64571755	64679660	107906	-	ENSG00000122877	EGR2	0.168191	24.0349	0.271661	0.191051	NA	NA	NA	NA	NA	NA	NA	NA	NA	NA	NA	NA
chr10	74766974	74856732	89759	-	ENSG00000122884	P4HA1	27.4549	26.8677	28.6231	49.0496	NA	NA	NA	NA	chr10	74856600	74856799	132	chr10	74871100	74871299	14368
chr12	52416615	52453291	36677	+	ENSG00000123358	NR4A1	2.72441	345.866	29.1242	10.0579	chr12	52427400	52427599	10785	chr12	52417450	52417649	835	NA	NA	NA	NA
chr12	49521564	49541652	20089	-	ENSG00000123416	TUBA1B	1084.51	907.64	1162.21	664.271	chr12	49524800	49524999	16852	chr12	49452800	49452999	88852	NA	NA	NA	NA
chr2	234684369	234763212	78844	-	ENSG00000123485	HJURP	51.2251	31.912	50.6255	17.0269	NA	NA	NA	NA	NA	NA	NA	NA	NA	NA	NA	NA
chr17	68164813	68176160	11348	+	ENSG00000123700	KCNJ2	4.5504	46.774	9.91418	13.8571	NA	NA	NA	NA	NA	NA	NA	NA	chr17	68163050	68163249	1763
chr2	225243414	225266802	23389	-	ENSG00000124019	FAM124B	54.9652	27.0082	25.4442	45.2901	NA	NA	NA	NA	chr2	225266400	225266599	402	chr2	225265400	225265599	1402
chr20	47826981	47905797	78817	-	ENSG00000124201	ZNFX1	17.9825	12.2818	24.4421	22.1293	chr20	47894100	47894299	11697	NA	NA	NA	NA	chr20	47904100	47904299	1697
chr20	48123991	48184683	60693	-	ENSG00000124212	PTGIS	2.66772	2.85987	7.20149	1.52668	chr20	48179600	48179799	5083	chr20	48179000	48179199	5683	NA	NA	NA	NA
chr16	56642110	56643409	1300	+	ENSG00000125148	MT2A	698.061	777.381	932.149	433.643	chr16	56643150	56643349	1040	NA	NA	NA	NA	chr16	56650450	56650649	8340
chr14	54416453	54425479	9027	-	ENSG00000125378	BMP4	174.06	116.741	88.5996	119.051	NA	NA	NA	NA	chr14	54421850	54422049	3629	NA	NA	NA	NA
chr19	45882891	45982086	99196	+	ENSG00000125740	FOSB	0.249919	9.30895	0.217204	0.14901	chr19	45906800	45906999	23909	chr19	45874950	45875149	7941	NA	NA	NA	NA
chr20	17594322	17662940	68619	-	ENSG00000125844	RRBP1	160.232	163.919	189.044	124.861	chr20	17730550	17730749	67610	chr20	17646800	17646999	16140	NA	NA	NA	NA
chr20	6748310	6760910	12601	+	ENSG00000125845	BMP2	1.72738	13.3426	7.10124	6.63754	NA	NA	NA	NA	NA	NA	NA	NA	chr20	6654400	6654599	93910
chr20	30193085	30194318	1234	+	ENSG00000125968	ID1	17.4716	31.1303	11.7124	16.0908	chr20	30192550	30192749	535	chr20	30114050	30114249	79035	NA	NA	NA	NA
chr1	45477818	45481247	3430	+	ENSG00000126088	UROD	194.057	203.385	357.012	270.644	NA	NA	NA	NA	chr1	45437200	45437399	40618	chr1	45414250	45414449	63568
chr14	61110131	61124977	14847	-	ENSG00000126778	SIX1	0.48641	0.271082	2.39299	0.128268	NA	NA	NA	NA	NA	NA	NA	NA	NA	NA	NA	NA
chr14	63670831	63759937	89107	+	ENSG00000126785	RHOJ	265.054	230.307	275.033	185.022	NA	NA	NA	NA	chr14	63673650	63673849	2819	chr14	63670100	63670299	731
chr5	179105583	179157926	52344	+	ENSG00000127022	CANX	950.709	879.73	1228.39	1098.85	chr5	179126300	179126499	20717	chr5	179051050	179051249	54533	NA	NA	NA	NA
chr19	15050245	16770955	1720711	+	ENSG00000127528	KLF2	16.1737	56.941	25.4306	23.5422	NA	NA	NA	NA	NA	NA	NA	NA	NA	NA	NA	NA
chr19	16999825	17002830	3006	+	ENSG00000127533	F2RL3	0.953227	5.32383	1.54776	1.48692	chr19	16999200	16999399	625	chr19	16949700	16949899	50125	NA	NA	NA	NA
chr19	39897486	39900045	2560	+	ENSG00000128016	ZFP36	3.48032	53.6371	8.22269	10.5891	chr19	39894700	39894899	2786	NA	NA	NA	NA	NA	NA	NA	NA
chr22	20067754	20114878	47125	+	ENSG00000128191	DGCR8	13.7355	22.0439	19.2741	13.2852	chr22	20104500	20104699	36746	chr22	19985900	19986099	81854	NA	NA	NA	NA
chr22	21996549	21998587	2039	+	ENSG00000128228	SDF2L1	31.4012	32.9602	90.3814	30.2854	chr22	21984100	21984299	12449	chr22	22021500	22021699	24951	NA	NA	NA	NA
chr22	37621300	37640488	19189	-	ENSG00000128340	RAC2	196.732	157.688	152.25	62.7872	chr22	37637850	37638049	2638	chr22	37651400	37651599	10912	NA	NA	NA	NA
chr7	131185020	131242976	57957	-	ENSG00000128567	PODXL	136.597	164.195	314.771	263.812	chr7	131240950	131241149	2026	chr7	131309900	131310099	66924	chr7	131207750	131207949	35226
chr7	108110865	108215294	104430	+	ENSG00000128590	DNAJB9	9.50226	15.5618	39.0277	13.3681	chr7	108096500	108096699	14365	NA	NA	NA	NA	chr7	108061250	108061449	49615
chr15	41221537	41231237	9701	+	ENSG00000128917	DLL4	17.818	32.2132	20.0885	40.1437	chr15	41222200	41222399	663	NA	NA	NA	NA	chr15	41311200	41311399	89663
chr14	20811206	20826064	14859	+	ENSG00000129484	PARP2	33.3407	28.5351	35.0847	17.7731	NA	NA	NA	NA	NA	NA	NA	NA	chr14	20818700	20818899	7494
chrX	23801289	23804343	3055	+	ENSG00000130066	SAT1	182.278	232.233	313.011	202.762	NA	NA	NA	NA	NA	NA	NA	NA	NA	NA	NA	NA
chr19	39138309	39235114	96806	+	ENSG00000130402	ACTN4	325.172	329.358	370.076	564.999	chr19	39177550	39177749	39241	NA	NA	NA	NA	NA	NA	NA	NA
chr11	2016405	2022700	6296	-	ENSG00000130600	H19	0.474031	2.22355	0.462191	1.36433	NA	NA	NA	NA	chr11	1968500	1968699	54200	NA	NA	NA	NA
chr12	123636866	123756881	120016	+	ENSG00000130921	C12orf65	23.82	13.0536	22.3953	18.7544	chr12	123590850	123591049	46016	NA	NA	NA	NA	NA	NA	NA	NA
chr6	151561133	151679692	118560	+	ENSG00000131016	AKAP12	53.4014	94.4952	104.328	108.384	chr6	151561850	151562049	717	chr6	151576550	151576749	15417	NA	NA	NA	NA
chr10	129705324	129884119	178796	+	ENSG00000132334	PTPRE	33.557	52.2901	42.0628	34.9409	NA	NA	NA	NA	NA	NA	NA	NA	chr10	129724550	129724749	19226
chr17	7743221	7758106	14886	+	ENSG00000132510	KDM6B	3.04695	10.5291	3.49438	3.21449	chr17	7746500	7746699	3279	chr17	7650000	7650199	93221	NA	NA	NA	NA
chr8	100025493	100906290	880798	+	ENSG00000132549	VPS13B	11.26	13.6517	4.96075	11.4099	NA	NA	NA	NA	NA	NA	NA	NA	NA	NA	NA	NA
chr1	46049517	46084566	35050	+	ENSG00000132780	NASP	122.872	112.125	105.761	67.5887	NA	NA	NA	NA	NA	NA	NA	NA	NA	NA	NA	NA
chr7	150322462	150329473	7012	-	ENSG00000133561	GIMAP6	60.4891	37.2171	45.4761	60.8682	NA	NA	NA	NA	chr7	150330250	150330449	777	chr7	150284600	150284799	44873
chr7	150264364	150271041	6678	+	ENSG00000133574	GIMAP4	327.678	196.637	177.359	235.901	NA	NA	NA	NA	chr7	150212150	150212349	52214	chr7	150284400	150284599	20036
chr11	12115542	12285334	169793	+	ENSG00000133816	MICAL2	80.9973	78.0287	94.6969	55.8132	chr11	12106300	12106499	9242	NA	NA	NA	NA	NA	NA	NA	NA
chr12	72003251	72097836	94586	-	ENSG00000133858	ZFC3H1	17.1488	9.31894	20.9404	24.4928	NA	NA	NA	NA	NA	NA	NA	NA	chr12	72080650	72080849	17186
chr14	70792101	70883778	91678	-	ENSG00000133983	COX16	162.65	144.833	130.265	226.199	NA	NA	NA	NA	NA	NA	NA	NA	NA	NA	NA	NA
chr5	68462836	68474072	11237	+	ENSG00000134057	CCNB1	141.575	115.742	118.373	64.6888	chr5	68390150	68390349	72686	NA	NA	NA	NA	NA	NA	NA	NA
chr3	4938492	5027008	88517	+	ENSG00000134107	BHLHE40	19.3807	91.7904	28.1986	15.0055	chr3	4910550	4910749	27942	NA	NA	NA	NA	chr3	5026800	5026999	88308
chr1	110210643	110318050	107408	+	ENSG00000134184	GSTM1	31.3354	30.8177	42.1494	16.4659	NA	NA	NA	NA	NA	NA	NA	NA	chr1	110161050	110161249	49593
chr12	46751971	46767561	15591	-	ENSG00000134294	SLC38A2	336.256	361.159	237.423	248.184	chr12	46765800	46765999	1761	chr12	46776800	46776999	9239	chr12	46694100	46694299	73461
chr2	16060520	16087129	26610	+	ENSG00000134323	MYCN	2.22868	1.1885	4.72098	5.4342	NA	NA	NA	NA	NA	NA	NA	NA	NA	NA	NA	NA
chr11	18415934	18429972	14039	+	ENSG00000134333	LDHA	437.188	354.862	465.597	279.044	chr11	18416450	18416649	516	NA	NA	NA	NA	NA	NA	NA	NA
chr5	55230922	55290772	59851	-	ENSG00000134352	IL6ST	219.295	235.431	391.506	294.772	chr5	55290150	55290349	622	NA	NA	NA	NA	chr5	55346150	55346349	55378
chr5	52776238	52782964	6727	+	ENSG00000134363	FST	10.3746	12.8495	18.0356	2.92059	NA	NA	NA	NA	NA	NA	NA	NA	NA	NA	NA	NA
chr12	13349649	13369708	20060	+	ENSG00000134531	EMP1	721.516	1011.44	928.034	635.317	chr12	13254600	13254799	95049	chr12	13316950	13317149	32699	chr12	13352650	13352849	3001
chr1	32254730	32281652	26923	-	ENSG00000134668	SPOCD1	10.2164	9.89768	14.5472	4.30083	chr1	32254750	32254949	26902	NA	NA	NA	NA	chr1	32355450	32355649	73798
chr1	38158089	38175391	17303	+	ENSG00000134690	CDCA8	25.3294	17.5659	22.1542	11.4897	NA	NA	NA	NA	NA	NA	NA	NA	chr1	38156500	38156699	1589
chr9	74298281	74431606	133326	-	ENSG00000135048	TMEM2	43.9656	55.3371	105.942	98.414	NA	NA	NA	NA	NA	NA	NA	NA	chr9	74524750	74524949	93144
chr12	49686413	49725514	39102	+	ENSG00000135451	TROAP	254.727	211.296	214.006	111.575	NA	NA	NA	NA	chr12	49658450	49658649	27963	NA	NA	NA	NA
chr2	225629806	225907162	277357	-	ENSG00000135905	DOCK10	15.7737	12.5491	25.7304	11.6438	NA	NA	NA	NA	NA	NA	NA	NA	chr2	225875750	225875949	31412
chr13	80910110	80915086	4977	-	ENSG00000136158	SPRY2	12.0717	31.1714	9.41508	9.08737	chr13	80914450	80914649	636	NA	NA	NA	NA	NA	NA	NA	NA
chr7	47314751	47622156	307406	-	ENSG00000136205	TNS3	14.037	19.2826	30.2058	14.0971	NA	NA	NA	NA	NA	NA	NA	NA	chr7	47576800	47576999	45356
chr7	23338357	23510086	171730	-	ENSG00000136231	IGF2BP3	108.237	96.243	83.5836	46.9627	chr7	23510600	23510799	514	NA	NA	NA	NA	NA	NA	NA	NA
chr7	22157908	22396763	238856	-	ENSG00000136237	RAPGEF5	18.2634	33.7457	28.9637	32.6676	NA	NA	NA	NA	NA	NA	NA	NA	NA	NA	NA	NA
chr7	22765013	22771621	6609	+	ENSG00000136244	IL6	8.31048	32.4424	6.96263	4.72453	NA	NA	NA	NA	chr7	22711750	22711949	53263	chr7	22715900	22716099	49113
chr14	24769067	24787242	18176	-	ENSG00000136305	CIDEB	5.47231	1.04694	11.9884	5.60099	chr14	24835800	24835999	48558	chr14	24803900	24804099	16658	NA	NA	NA	NA
chr3	170075465	170111651	36187	+	ENSG00000136603	SKIL	50.4289	68.9417	37.4366	40.331	chr3	170076000	170076199	535	chr3	170074500	170074699	965	NA	NA	NA	NA
chr1	221006104	221059124	53021	+	ENSG00000136630	HLX	12.3611	55.8988	37.5679	38.2883	NA	NA	NA	NA	NA	NA	NA	NA	chr1	221012650	221012849	6546
chr2	131095813	131105383	9571	+	ENSG00000136718	IMP4	36.9721	31.8621	43.2916	22.9708	chr2	131129800	131129999	33987	NA	NA	NA	NA	NA	NA	NA	NA
chr9	129677052	129985445	308394	-	ENSG00000136859	ANGPTL2	21.714	21.7835	21.899	53.3062	chr9	129885500	129885699	99945	chr9	129926200	129926399	59245	NA	NA	NA	NA
chr8	128747679	128753674	5996	+	ENSG00000136997	MYC	32.9364	64.1088	26.6507	27.2964	chr8	128747200	128747399	479	chr8	128750750	128750949	3071	chr8	128746750	128746949	929
chr9	6215804	6257983	42180	+	ENSG00000137033	IL33	7.96816	5.21216	1.60752	1.24026	NA	NA	NA	NA	NA	NA	NA	NA	NA	NA	NA	NA
chr6	3153902	3157809	3908	-	ENSG00000137267	TUBB2A	27.802	33.7351	32.4784	15.3119	chr6	3064300	3064499	93509	NA	NA	NA	NA	NA	NA	NA	NA
chr6	34204576	34214008	9433	+	ENSG00000137309	HMGA1	430.737	409.448	381.899	271.359	chr6	34205650	34205849	1074	NA	NA	NA	NA	NA	NA	NA	NA
chr11	110447765	110583912	136148	-	ENSG00000137727	ARHGAP20	0.450502	0.485403	2.58628	0.437918	NA	NA	NA	NA	NA	NA	NA	NA	NA	NA	NA	NA
chr15	47476297	48066420	590124	+	ENSG00000137872	SEMA6D	5.95357	7.6905	24.7716	19.9999	NA	NA	NA	NA	NA	NA	NA	NA	chr15	47477250	47477449	953
chr10	90965693	90967071	1379	-	ENSG00000138135	CH25H	0.217502	2.22302	0.273528	0.0551623	NA	NA	NA	NA	chr10	90875650	90875849	91421	chr10	90881800	90881999	85271
chr10	112257595	112271302	13708	+	ENSG00000138166	DUSP5	5.17827	57.7898	17.9687	12.3804	chr10	112256700	112256899	895	NA	NA	NA	NA	NA	NA	NA	NA
chr2	197063976	197458416	394441	-	ENSG00000138411	HECW2	60.5347	72.3231	155.23	101.287	NA	NA	NA	NA	NA	NA	NA	NA	NA	NA	NA	NA
chr3	101043048	101232085	189038	-	ENSG00000138468	SENP7	5.19847	7.88882	3.70538	6.31666	chr3	101231800	101231999	285	NA	NA	NA	NA	chr3	101239800	101239999	7715
chr4	84457066	84527028	69963	+	ENSG00000138678	AGPAT9	8.44819	2.76602	3.70316	9.48995	NA	NA	NA	NA	NA	NA	NA	NA	chr4	84377500	84377699	79566
chr9	116207010	116360018	153009	+	ENSG00000138835	RGS3	198.638	288.012	233.552	224.344	NA	NA	NA	NA	chr9	116263850	116264049	56840	chr9	116218100	116218299	11090
chr12	42632248	42984157	351910	-	ENSG00000139174	PRICKLE1	30.6142	42.4925	23.5907	22.2935	NA	NA	NA	NA	chr12	42983450	42983649	707	chr12	42980300	42980499	3857
chr12	59265930	59314303	48374	-	ENSG00000139263	LRIG3	23.6184	49.4777	19.3397	17.3001	chr12	59313750	59313949	553	chr12	59324950	59325149	10647	chr12	59311650	59311849	2653
chr12	89741049	89747048	6000	-	ENSG00000139318	DUSP6	67.5357	115.776	93.4625	75.0999	chr12	89768350	89768549	21302	chr12	89745300	89745499	1748	chr12	89744150	89744349	2898
chr13	30083546	30169721	86176	-	ENSG00000139514	SLC7A1	16.3177	22.7804	33.6673	16.1304	chr13	30117150	30117349	52571	chr13	30110100	30110299	59621	NA	NA	NA	NA
chr14	100800124	100996640	196517	-	ENSG00000140105	WARS	251.264	232.557	372.245	320.693	NA	NA	NA	NA	chr14	100911700	100911899	84940	NA	NA	NA	NA
chr15	65107830	65117867	10038	-	ENSG00000140451	PIF1	20.9339	11.4373	21.4758	9.08332	chr15	65134350	65134549	16483	NA	NA	NA	NA	NA	NA	NA	NA
chr16	64977655	65156101	178447	-	ENSG00000140937	CDH11	15.1054	14.5358	20.1822	9.62689	chr16	65156200	65156399	99	chr16	65159600	65159799	3499	chr16	65058200	65058399	97901
chr21	38435145	45747259	7312115	-	ENSG00000142178	SIK1	1.28473	18.0315	1.76591	1.42141	chr21	45720250	45720449	27009	NA	NA	NA	NA	chr21	45759850	45760049	12591
chr21	34757298	34853499	96202	-	ENSG00000142188	TMEM50B	40.3132	29.263	60.4802	38.5767	chr21	34852550	34852749	949	NA	NA	NA	NA	NA	NA	NA	NA
chr1	145524890	145543868	18979	+	ENSG00000143127	ITGA10	26.4805	34.4765	55.858	48.3273	chr1	145477100	145477299	47790	chr1	145516000	145516199	8890	chr1	145544250	145544449	19360
chr1	183605207	183897666	292460	+	ENSG00000143344	RGL1	17.2741	31.9228	41.0511	35.7057	chr1	183604150	183604349	1057	NA	NA	NA	NA	chr1	183667700	183667899	62493
chr1	150547031	150552073	5043	-	ENSG00000143384	MCL1	65.805	112.134	66.3273	64.6191	chr1	150551850	150552049	223	chr1	150552250	150552449	177	NA	NA	NA	NA
chr1	221874765	221915518	40754	-	ENSG00000143507	DUSP10	1.36156	9.87106	3.57917	2.65331	NA	NA	NA	NA	chr1	221934650	221934849	19132	chr1	222000800	222000999	85282
chr1	154127783	154167124	39342	-	ENSG00000143549	TPM3	446.517	501.702	440.832	313.534	NA	NA	NA	NA	chr1	154193750	154193949	26626	NA	NA	NA	NA
chr1	226819390	226927024	107635	-	ENSG00000143772	ITPKB	29.566	59.0907	40.9784	43.9423	chr1	226926300	226926499	724	chr1	226965700	226965899	38676	chr1	227006550	227006749	79526
chr1	227177565	227506175	328611	-	ENSG00000143776	CDC42BPA	28.2306	37.9958	26.452	36.1039	chr1	227505500	227505699	675	NA	NA	NA	NA	chr1	227558750	227558949	52575
chr2	95752951	95831158	78208	-	ENSG00000144026	ZNF514	19.5198	3.78639	12.9637	13.3133	chr2	95825450	95825649	5708	NA	NA	NA	NA	NA	NA	NA	NA
chr2	110841446	110874143	32698	-	ENSG00000144063	MALL	133.908	132.177	150.379	78.7087	chr2	110873800	110873999	343	chr2	110864550	110864749	9593	NA	NA	NA	NA
chr2	159313475	159610287	296813	+	ENSG00000144283	PKP4	26.5307	29.0091	13.6864	23.9783	NA	NA	NA	NA	NA	NA	NA	NA	NA	NA	NA	NA
chr2	237476429	237491001	14573	+	ENSG00000144476	CXCR7	3.14299	19.1793	8.50816	5.51121	NA	NA	NA	NA	NA	NA	NA	NA	NA	NA	NA	NA
chr2	219433302	219461803	28502	+	ENSG00000144580	RQCD1	53.0048	49.3447	72.2879	55.4906	chr2	219432850	219433049	452	chr2	219496250	219496449	62948	chr2	219435250	219435449	1948
chr3	39183345	39196053	12709	-	ENSG00000144655	CSRNP1	6.39453	34.7793	7.09705	5.74482	chr3	39195800	39195999	253	chr3	39184750	39184949	11303	chr3	39207200	39207399	11147
chr3	101498045	101579866	81822	+	ENSG00000144802	NFKBIZ	7.35413	36.2174	7.93943	6.57092	NA	NA	NA	NA	NA	NA	NA	NA	NA	NA	NA	NA
chr3	111393522	111695364	301843	+	ENSG00000144824	PHLDB2	53.8322	55.8425	36.831	42.3949	NA	NA	NA	NA	NA	NA	NA	NA	chr3	111466150	111466349	72628
chr3	172348038	172429008	80971	-	ENSG00000144959	NCEH1	13.8731	14.3196	20.3748	8.58149	chr3	172469050	172469249	40042	NA	NA	NA	NA	chr3	172467500	172467699	38492
chr3	194304739	194393206	88468	-	ENSG00000145014	TMEM44	40.9765	39.7461	22.337	33.6188	chr3	194307900	194308099	85306	chr3	194385450	194385649	7756	NA	NA	NA	NA
chr4	152020724	152025804	5081	+	ENSG00000145425	RPS3A	636.269	474.234	545.669	500.588	NA	NA	NA	NA	chr4	152021000	152021199	276	NA	NA	NA	NA
chr5	67511547	67597649	86103	+	ENSG00000145675	PIK3R1	16.8045	31.2187	13.7238	14.2625	chr5	67511900	67512099	353	NA	NA	NA	NA	NA	NA	NA	NA
chr6	20534687	21232635	697949	+	ENSG00000145996	CDKAL1	15.2086	15.4147	7.87027	11.6774	NA	NA	NA	NA	NA	NA	NA	NA	NA	NA	NA	NA
chr5	136953188	137071779	118592	-	ENSG00000146021	KLHL3	3.12272	3.59144	1.04857	2.99548	NA	NA	NA	NA	NA	NA	NA	NA	chr5	137072950	137073149	1171
chr7	45951849	45961473	9625	-	ENSG00000146674	IGFBP3	1.17546	10.7338	8.2906	2.17797	NA	NA	NA	NA	NA	NA	NA	NA	NA	NA	NA	NA
chr7	139024202	139108198	83997	+	ENSG00000146963	LUC7L2	84.481	87.3656	105.529	61.3612	chr7	139026150	139026349	1948	NA	NA	NA	NA	NA	NA	NA	NA
chrX	41374186	41782716	408531	-	ENSG00000147044	CASK	17.3138	18.7238	12.2693	27.1239	NA	NA	NA	NA	NA	NA	NA	NA	NA	NA	NA	NA
chr8	28625177	28922453	297277	+	ENSG00000147421	HMBOX1	10.7097	11.8365	20.6994	13.6887	chr8	28559300	28559499	65877	NA	NA	NA	NA	chr8	28570700	28570899	54477
chr9	130823511	130871524	48014	+	ENSG00000148339	SLC25A25	9.82731	22.8866	15.9582	11.5889	chr9	130830950	130831149	7439	chr9	130914800	130914999	91289	chr9	130773300	130773499	50211
chr10	77190328	78318978	1128651	+	ENSG00000148655	C10orf11	10.8471	1.83285	3.16493	6.36961	NA	NA	NA	NA	NA	NA	NA	NA	NA	NA	NA	NA
chr11	109964086	110042566	78481	+	ENSG00000149289	ZC3H12C	2.90271	8.5435	7.03597	4.90665	chr11	109964500	109964699	414	NA	NA	NA	NA	chr11	109940550	109940749	23536
chr12	66151799	66360075	208277	+	ENSG00000149948	HMGA2	52.6565	31.8166	61.8255	34.4976	chr12	66219100	66219299	67301	NA	NA	NA	NA	chr12	66251050	66251249	99251
chr13	41129816	41240734	110919	-	ENSG00000150907	FOXO1	16.9058	35.1095	11.6831	15.4861	NA	NA	NA	NA	chr13	41241350	41241549	616	chr13	41239900	41240099	834
chr3	25760434	25836025	75592	+	ENSG00000151093	OXSM	7.71907	4.45924	12.5978	8.34278	chr3	25706750	25706949	53684	chr3	25731100	25731299	29334	NA	NA	NA	NA
chr1	198126092	198291550	165459	+	ENSG00000151414	NEK7	14.2266	13.6801	25.9961	12.3832	chr1	198126300	198126499	208	NA	NA	NA	NA	chr1	198129000	198129199	2908
chr5	108083522	108532542	449021	+	ENSG00000151422	FER	4.94851	5.1171	8.65961	3.1905	NA	NA	NA	NA	NA	NA	NA	NA	NA	NA	NA	NA
chr2	7052407	7218011	165605	+	ENSG00000151692	RNF144A	6.84617	7.19049	2.49547	6.26375	NA	NA	NA	NA	NA	NA	NA	NA	chr2	7133800	7133999	81393
chr2	15307031	15701454	394424	-	ENSG00000151779	NBAS	18.3035	18.3766	11.124	21.9993	NA	NA	NA	NA	NA	NA	NA	NA	chr2	15719300	15719499	17846
chr10	14920818	14996431	75614	+	ENSG00000152455	SUV39H2	12.6811	9.15112	19.0971	10.8853	chr10	14921100	14921299	282	chr10	14880500	14880699	40318	NA	NA	NA	NA
chr3	151961616	152214602	252987	+	ENSG00000152601	MBNL1	278.103	333.197	500.092	315.962	NA	NA	NA	NA	chr3	152028950	152029149	67334	chr3	151989350	151989549	27734
chr2	33661390	33789817	128428	+	ENSG00000152689	RASGRP3	29.3907	25.4217	61.7043	55.3463	NA	NA	NA	NA	chr2	33668850	33669049	7460	chr2	33660750	33660949	640
chr2	157180943	157198860	17918	-	ENSG00000153234	NR4A2	0.446279	71.4582	3.80782	0.61682	chr2	157190800	157190999	8060	NA	NA	NA	NA	chr2	157197400	157197599	1460
chr6	154726310	154831793	105484	-	ENSG00000153721	CNKSR3	4.97897	8.12391	18.0692	16.5003	chr6	154831250	154831449	543	chr6	154812000	154812199	19793	chr6	154836800	154836999	5007
chr3	120405527	120501916	96390	+	ENSG00000153767	GTF2E1	26.0843	10.804	24.747	18.6544	NA	NA	NA	NA	NA	NA	NA	NA	chr3	120397800	120397999	7727
chr11	119252519	119397374	144856	-	ENSG00000154096	THY1	0.364485	0.0463929	1.66209	5.85491	NA	NA	NA	NA	NA	NA	NA	NA	NA	NA	NA	NA
chr21	28208605	28217728	9124	-	ENSG00000154734	ADAMTS1	4.86762	36.0978	24.7682	15.1932	chr21	28218300	28218499	572	NA	NA	NA	NA	NA	NA	NA	NA
chr20	24986867	25039616	52750	-	ENSG00000154930	ACSS1	1.95082	1.32398	0.778232	2.83262	chr20	24972950	24973149	66666	chr20	25038750	25038949	866	NA	NA	NA	NA
chr8	103661006	103668130	7125	-	ENSG00000155090	KLF10	11.0393	36.9774	8.33946	8.51996	chr8	103668900	103669099	770	chr8	103666250	103666449	1880	NA	NA	NA	NA
chr21	15743435	15755805	12371	-	ENSG00000155304	HSPA13	50.1034	57.4636	86.3308	46.3087	NA	NA	NA	NA	NA	NA	NA	NA	NA	NA	NA	NA
chr14	74181824	74269973	88150	-	ENSG00000156030	C14orf43	18.8305	32.8015	15.2997	14.6598	chr14	74252850	74253049	17123	chr14	74227100	74227299	42873	NA	NA	NA	NA
chr8	97238147	97250262	12116	-	ENSG00000156467	UQCRB	84.3818	62.8913	178.079	92.2746	chr8	97273550	97273749	23288	NA	NA	NA	NA	NA	NA	NA	NA
chr8	124014799	124164393	149595	+	ENSG00000156787	WDR67	7.66688	5.88551	7.12158	2.0681	NA	NA	NA	NA	NA	NA	NA	NA	NA	NA	NA	NA
chr8	124510128	124553446	43319	-	ENSG00000156804	FBXO32	27.1723	27.6648	37.5775	68.7084	NA	NA	NA	NA	chr8	124553300	124553499	146	chr8	124481650	124481849	71796
chr15	59063390	59389618	326229	+	ENSG00000157450	RNF111	29.4999	24.107	43.8627	32.7697	NA	NA	NA	NA	NA	NA	NA	NA	NA	NA	NA	NA
chr15	59427112	59815748	388637	-	ENSG00000157483	MYO1E	59.3272	64.3589	114.131	122.583	NA	NA	NA	NA	NA	NA	NA	NA	NA	NA	NA	NA
chr21	38435145	45747259	7312115	+	ENSG00000157540	DYRK1A	17.9706	37.3965	19.4388	24.3945	chr21	38444900	38445099	9755	NA	NA	NA	NA	NA	NA	NA	NA
chrX	50334646	50557302	222657	-	ENSG00000158352	SHROOM4	27.1974	26.611	57.4241	44.5974	NA	NA	NA	NA	NA	NA	NA	NA	chrX	50511550	50511749	45752
chr21	33996725	34100359	103635	-	ENSG00000159082	SYNJ1	6.90751	7.04474	4.46956	15.2186	NA	NA	NA	NA	chr21	34080100	34080299	20259	NA	NA	NA	NA
chr8	23699427	23712320	12894	-	ENSG00000159167	STC1	0.890272	7.15994	12.4042	2.6389	chr8	23614400	23614599	97920	NA	NA	NA	NA	chr8	23706050	23706249	6270
chr1	201452657	201502736	50080	-	ENSG00000159176	CSRP1	479.985	573.057	795.018	352.491	chr1	201507750	201507949	5014	chr1	201437850	201438049	64886	chr1	201512000	201512199	9264
chr21	35885439	35987441	102003	-	ENSG00000159200	RCAN1	22.0674	304.035	125.851	73.3588	NA	NA	NA	NA	NA	NA	NA	NA	chr21	35924800	35924999	62641
chr17	61554421	61599209	44789	+	ENSG00000159640	ACE	51.6772	59.3596	74.6888	122.582	chr17	61523950	61524149	30471	chr17	61539250	61539449	15171	NA	NA	NA	NA
chr7	143078172	143220542	142371	+	ENSG00000159840	ZYX	162.101	192.415	190.802	132.653	chr7	143077850	143078049	322	chr7	143078600	143078799	428	NA	NA	NA	NA
chr11	117070036	117103241	33206	-	ENSG00000160613	PCSK7	35.1837	39.0732	40.9522	24.0398	chr11	117103000	117103199	241	NA	NA	NA	NA	NA	NA	NA	NA
chr19	13261281	13265716	4436	+	ENSG00000160888	IER2	25.4873	57.6113	27.5705	25.3255	chr19	13261750	13261949	469	chr19	13278500	13278699	17219	NA	NA	NA	NA
chr5	179224596	179334859	110264	+	ENSG00000161011	SQSTM1	245.19	259.056	354.889	216.856	chr5	179234000	179234199	9404	NA	NA	NA	NA	NA	NA	NA	NA
chr12	52400723	52409673	8951	+	ENSG00000161835	GRASP	29.3294	61.0555	29.9225	29.2102	chr12	52400900	52401099	177	chr12	52417450	52417649	16727	NA	NA	NA	NA
chr17	6926368	6933219	6852	+	ENSG00000161940	BCL6B	138.232	300.313	259.622	142.68	chr17	6926650	6926849	282	chr17	6915850	6916049	10518	NA	NA	NA	NA
chr11	64888099	64902004	13906	-	ENSG00000162298	SYVN1	17.1741	21.2165	46.9169	27.8198	chr11	64901550	64901749	454	chr11	64948950	64949149	46946	NA	NA	NA	NA
chr1	101185304	101204601	19298	+	ENSG00000162692	VCAM1	1.37135	2.95741	38.2828	3.96527	NA	NA	NA	NA	NA	NA	NA	NA	chr1	101201250	101201449	15946
chr1	212738675	212794119	55445	+	ENSG00000162772	ATF3	3.15119	32.6772	6.16078	4.4061	NA	NA	NA	NA	NA	NA	NA	NA	NA	NA	NA	NA
chr1	223889294	223963720	74427	+	ENSG00000162909	CAPN2	206.514	173.447	193.984	117.507	chr1	223895950	223896149	6656	chr1	223900400	223900599	11106	NA	NA	NA	NA
chr2	95831176	95850065	18890	+	ENSG00000163067	ZNF2	2.52573	0.644232	2.06227	2.7524	chr2	95825450	95825649	5726	NA	NA	NA	NA	NA	NA	NA	NA
chr4	95373036	95589377	216342	+	ENSG00000163110	PDLIM5	186.749	184.925	230.227	144.046	NA	NA	NA	NA	NA	NA	NA	NA	chr4	95334900	95335099	38136
chr2	37827278	37965611	138334	-	ENSG00000163171	CDC42EP3	15.6076	23.2295	11.3546	18.1034	chr2	37899000	37899199	66611	NA	NA	NA	NA	chr2	37880700	37880899	84911
chr3	33537736	33759848	222113	-	ENSG00000163539	CLASP2	41.1447	39.6788	66.6429	73.2628	NA	NA	NA	NA	NA	NA	NA	NA	chr3	33764700	33764899	4852
chr1	158580277	158656488	76212	-	ENSG00000163554	SPTA1	0.777895	0.229016	0.0377333	0.883435	NA	NA	NA	NA	NA	NA	NA	NA	NA	NA	NA	NA
chr1	158969757	159024945	55189	+	ENSG00000163565	IFI16	122.074	114.477	94.4009	162.662	NA	NA	NA	NA	NA	NA	NA	NA	chr1	158979950	158980149	10193
chr3	64501332	64997143	495812	-	ENSG00000163638	ADAMTS9	6.85826	12.3005	33.5544	14.981	NA	NA	NA	NA	NA	NA	NA	NA	chr3	64981800	64981999	15343
chr3	156389650	156424559	34910	+	ENSG00000163659	TIPARP	7.1358	13.327	7.38582	8.06502	chr3	156392500	156392699	2850	NA	NA	NA	NA	NA	NA	NA	NA
chr3	156864296	156878549	14254	-	ENSG00000163660	CCNL1	61.0868	113.525	71.164	71.5648	NA	NA	NA	NA	chr3	156877450	156877649	1099	chr3	156966250	156966449	87701
chr3	156893011	157251408	358398	+	ENSG00000163661	PTX3	87.1758	68.4808	47.4248	18.6271	NA	NA	NA	NA	chr3	156877450	156877649	15561	chr3	156966250	156966449	73239
chr4	74735109	74736959	1851	+	ENSG00000163739	CXCL1	9.94084	41.8837	5.05189	3.39309	NA	NA	NA	NA	NA	NA	NA	NA	NA	NA	NA	NA
chr3	43328003	43775863	447861	+	ENSG00000163788	SNRK	46.5727	93.9197	40.5618	52.2583	chr3	43328450	43328649	447	chr3	43259950	43260149	68053	chr3	43227900	43228099	100103
chr3	53258722	53290068	31347	-	ENSG00000163931	TKT	268.75	224.467	296.104	174.623	chr3	53289500	53289699	568	chr3	53303700	53303899	13632	NA	NA	NA	NA
chr3	52529353	52742182	212830	+	ENSG00000163938	GNL3	140.111	106.755	196.153	116.558	chr3	52528450	52528649	903	chr3	52525500	52525699	3853	NA	NA	NA	NA
chr1	43312279	43318148	5870	+	ENSG00000164011	ZNF691	7.12075	2.16694	6.53042	4.70138	chr1	43233050	43233249	79229	chr1	43282900	43283099	29379	NA	NA	NA	NA
chr4	124317949	124324910	6962	+	ENSG00000164056	SPRY1	16.9309	43.1988	34.0801	39.4648	NA	NA	NA	NA	NA	NA	NA	NA	chr4	124339100	124339299	21151
chr5	110831730	111353006	521277	-	ENSG00000164211	STARD4	118.373	179.026	182.836	111.477	NA	NA	NA	NA	NA	NA	NA	NA	NA	NA	NA	NA
chr5	54273691	54281491	7801	-	ENSG00000164283	ESM1	234.319	243.396	465.454	943.346	NA	NA	NA	NA	NA	NA	NA	NA	chr5	54280350	54280549	1141
chr5	148724992	148737205	12214	+	ENSG00000164284	GRPEL2	14.235	28.3871	24.2591	20.9603	NA	NA	NA	NA	NA	NA	NA	NA	chr5	148669500	148669699	55492
chr5	54408798	54469005	60208	+	ENSG00000164294	GPX8	135.515	145.452	174.443	259.714	NA	NA	NA	NA	NA	NA	NA	NA	chr5	54406550	54406749	2248
chr6	139693392	139695757	2366	-	ENSG00000164442	CITED2	21.147	85.04	30.6894	25.4796	chr6	139696150	139696349	393	chr6	139713400	139713599	17643	chr6	139644350	139644549	51407
chr5	55395506	55529186	133681	-	ENSG00000164512	ANKRD55	1.53645	1.48586	4.26456	4.16833	chr5	55436600	55436799	92586	NA	NA	NA	NA	chr5	55485600	55485799	43586
chr8	80676244	80680098	3855	-	ENSG00000164683	HEY1	1.875	6.7845	4.06051	2.41736	chr8	80681200	80681399	1102	NA	NA	NA	NA	NA	NA	NA	NA
chr8	11700032	11726957	26926	-	ENSG00000164733	CTSB	559.39	532.38	690.221	680.411	chr8	11711950	11712149	15007	chr8	11725000	11725199	1957	NA	NA	NA	NA
chr8	12940869	13373167	432299	-	ENSG00000164741	DLC1	51.3155	85.7987	51.9802	65.6602	NA	NA	NA	NA	NA	NA	NA	NA	NA	NA	NA	NA
chr7	1036622	1177896	141275	+	ENSG00000164849	GPR146	14.8843	10.9967	4.35678	13.651	chr7	1067300	1067499	30678	chr7	1091950	1092149	55328	chr7	1125600	1125799	88978
chr8	104410862	104455681	44820	-	ENSG00000164933	SLC25A32	10.8379	17.9697	15.8133	16.888	chr8	104530700	104530899	75019	NA	NA	NA	NA	chr8	104428100	104428299	27581
chr8	95261480	95274578	13099	-	ENSG00000164949	GEM	0.0657662	2.33418	0.296395	0.116274	chr8	95254050	95254249	20528	NA	NA	NA	NA	NA	NA	NA	NA
chr11	82534543	82782965	248423	+	ENSG00000165490	C11orf82	22.4244	9.39622	17.113	7.74634	NA	NA	NA	NA	chr11	82504850	82505049	29693	chr11	82633200	82633399	98657
chr10	45306471	45490172	183702	-	ENSG00000165507	C10orf10	257.01	103.848	306.166	388.799	NA	NA	NA	NA	chr10	45496350	45496549	6178	chr10	45492500	45492699	2328
chr12	77415026	77459360	44335	-	ENSG00000165891	E2F7	8.50801	7.90585	9.12157	3.99864	NA	NA	NA	NA	NA	NA	NA	NA	chr12	77515850	77516049	56490
chr12	104235228	104359486	124259	+	ENSG00000166598	HSP90B1	1006.09	948.638	1550.15	1476.37	NA	NA	NA	NA	chr12	104274600	104274799	39372	NA	NA	NA	NA
chr12	57482676	57607134	124459	+	ENSG00000166886	NAB2	6.7089	30.9941	17.5333	11.3023	chr12	57483150	57483349	474	NA	NA	NA	NA	chr12	57382900	57383099	99776
chr15	67356100	67487533	131434	+	ENSG00000166949	SMAD3	41.3565	41.1832	63.4343	35.6059	chr15	67358400	67358599	2300	chr15	67400250	67400449	44150	chr15	67318400	67318599	37700
chr9	131843378	131852717	9340	+	ENSG00000167130	DOLPP1	16.691	12.2357	21.8413	10.1519	chr9	131843550	131843749	172	chr9	131901900	131902099	58522	NA	NA	NA	NA
chr19	1248551	1259139	10589	+	ENSG00000167470	MIDN	22.2577	46.3543	29.5984	29.3077	chr19	1249350	1249549	799	chr19	1252300	1252499	3749	NA	NA	NA	NA
chr12	49578578	49667116	88539	-	ENSG00000167552	TUBA1A	690.644	637.742	763.38	609.494	chr12	49582100	49582299	85016	chr12	49658450	49658649	8666	NA	NA	NA	NA
chr19	41725107	41767670	42564	+	ENSG00000167601	AXL	90.5779	78.4152	60.5069	34.4934	chr19	41732050	41732249	6943	NA	NA	NA	NA	NA	NA	NA	NA
chr19	36379142	36393185	14044	-	ENSG00000167604	NFKBID	1.47386	10.7518	1.26447	0.436872	chr19	36390800	36390999	2385	NA	NA	NA	NA	NA	NA	NA	NA
chr11	67374322	67380006	5685	+	ENSG00000167792	NDUFV1	101.221	102.442	109.441	67.1786	chr11	67374550	67374749	228	NA	NA	NA	NA	NA	NA	NA	NA
chr22	28144264	28197486	53223	-	ENSG00000169184	MN1	2.01747	1.97552	0.393483	1.15503	chr22	28113650	28113849	83836	chr22	28207550	28207749	10064	chr22	28265100	28265299	67614
chr1	155099935	155107333	7399	+	ENSG00000169242	EFNA1	80.0899	68.3401	53.3746	86.1209	chr1	155102750	155102949	2815	chr1	155100550	155100749	615	NA	NA	NA	NA
chr3	155755489	156256545	501057	+	ENSG00000169282	KCNAB1	31.045	25.6302	24.5485	9.18449	NA	NA	NA	NA	NA	NA	NA	NA	NA	NA	NA	NA
chr4	74606222	74609433	3212	+	ENSG00000169429	IL8	4.37931	53.6283	4.15368	1.27229	NA	NA	NA	NA	chr4	74563250	74563449	42972	chr4	74595750	74595949	10472
chr16	56659386	56661024	1639	+	ENSG00000169715	MT1E	93.5906	118.838	181.054	66.2629	chr16	56643150	56643349	16236	NA	NA	NA	NA	chr16	56650450	56650649	8936
chr8	82351670	82445510	93841	-	ENSG00000170323	FABP4	169.614	160.618	149.032	311.731	NA	NA	NA	NA	NA	NA	NA	NA	NA	NA	NA	NA
chr14	75745476	75748933	3458	+	ENSG00000170345	FOS	0.993526	8.66835	1.71288	1.93684	chr14	75745250	75745449	226	chr14	75715550	75715749	29926	NA	NA	NA	NA
chr14	73945190	74025651	80462	+	ENSG00000170468	AC005280.1	3.03051	0	0.000138753	5.26701	chr14	73957900	73958099	12710	chr14	73892050	73892249	53140	chr14	73927900	73928099	17290
chr10	6186880	6277495	90616	+	ENSG00000170525	PFKFB3	22.2322	53.6464	24.7784	13.4722	chr10	6206950	6207149	20070	chr10	6280600	6280799	93720	chr10	6199550	6199749	12670
chr7	32535037	33102409	567373	-	ENSG00000170852	KBTBD2	26.6948	47.326	32.5069	29.8472	chr7	33148750	33148949	46341	chr7	33075050	33075249	27359	NA	NA	NA	NA
chr11	105866349	105893130	26782	-	ENSG00000170903	KIAA1826	10.9446	5.73189	13.3731	12.377	chr11	105948400	105948599	55270	NA	NA	NA	NA	NA	NA	NA	NA
chr11	103777913	104035107	257195	-	ENSG00000170962	PDGFD	7.04051	4.76964	14.4321	26.347	NA	NA	NA	NA	NA	NA	NA	NA	NA	NA	NA	NA
chr1	101702443	101707074	4632	+	ENSG00000170989	S1PR1	101.139	150.412	95.1624	94.799	chr1	101767500	101767699	65057	chr1	101702600	101702799	157	chr1	101707350	101707549	4907
chr1	249144204	249153343	9140	-	ENSG00000171163	ZNF692	18.8058	10.4645	17.7128	15.6326	chr1	249132950	249133149	20393	NA	NA	NA	NA	NA	NA	NA	NA
chr2	27994583	28561768	567186	-	ENSG00000171174	RBKS	0.375493	16.0314	4.03062	1.52811	chr2	28578200	28578399	16432	NA	NA	NA	NA	NA	NA	NA	NA
chr19	12902309	12904124	1816	+	ENSG00000171223	JUNB	7.60048	55.6808	13.6566	10.424	chr19	12902900	12903099	591	NA	NA	NA	NA	chr19	12894200	12894399	8109
chr5	73923233	74072737	149505	-	ENSG00000171617	ENC1	30.5584	29.88	13.1369	13.3806	NA	NA	NA	NA	NA	NA	NA	NA	NA	NA	NA	NA
chr10	64926980	65225722	298743	-	ENSG00000171988	JMJD1C	29.2845	61.0932	40.7649	43.087	chr10	65225150	65225349	572	chr10	65192750	65192949	32972	chr10	65201900	65202099	23822
chr2	10182975	10194963	11989	+	ENSG00000172059	KLF11	5.85213	10.6803	5.97814	5.81082	NA	NA	NA	NA	NA	NA	NA	NA	NA	NA	NA	NA
chr7	25159709	25164980	5272	-	ENSG00000172115	CYCS	303.353	239.532	373.91	182.205	chr7	25068550	25068749	96430	NA	NA	NA	NA	NA	NA	NA	NA
chr15	89179383	89199714	20332	+	ENSG00000172183	ISG20	16.6395	24.8781	55.0101	28.2146	chr15	89181600	89181799	2217	NA	NA	NA	NA	NA	NA	NA	NA
chr12	49250927	49259681	8755	-	ENSG00000172602	RND1	2.22335	11.5486	5.58584	6.03413	chr12	49259200	49259399	481	NA	NA	NA	NA	NA	NA	NA	NA
chr11	65590492	65641063	50572	-	ENSG00000172757	CFL1	1975.02	1794.18	2137.37	1449.63	chr11	65655200	65655399	14137	chr11	65628350	65628549	12713	NA	NA	NA	NA
chr8	8993764	9009084	15321	-	ENSG00000173281	PPP1R3B	15.3057	20.9721	9.29765	12.8394	NA	NA	NA	NA	NA	NA	NA	NA	NA	NA	NA	NA
chr8	126442562	126450647	8086	+	ENSG00000173334	TRIB1	7.98239	25.3328	8.15721	4.57543	chr8	126442700	126442899	138	chr8	126441950	126442149	612	chr8	126483150	126483349	40588
chr1	208057593	208084747	27155	-	ENSG00000174059	CD34	175.595	202.867	222.64	319.04	chr1	208042800	208042999	41947	chr1	208132500	208132699	47753	chr1	208085050	208085249	303
chr3	23933150	24021237	88088	+	ENSG00000174738	NR1D2	8.26879	14.4156	7.54679	8.26597	chr3	23958850	23959049	25700	chr3	23986900	23987099	53750	NA	NA	NA	NA
chr12	57853917	57914300	60384	-	ENSG00000175197	DDIT3	16.9048	47.8348	56.5051	18.5255	NA	NA	NA	NA	chr12	57998250	57998449	83950	chr12	57984850	57985049	70550
chr11	45670426	45687172	16747	-	ENSG00000175264	CHST1	25.2715	25.8497	13.2801	42.0227	NA	NA	NA	NA	chr11	45686550	45686749	622	chr11	45665900	45666099	21272
chr11	65659489	65668044	8556	-	ENSG00000175592	FOSL1	26.0937	36.805	25.8994	11.538	chr11	65667600	65667799	444	chr11	65660450	65660649	7594	NA	NA	NA	NA
chr12	9217772	9268825	51054	-	ENSG00000175899	A2M	9.82325	8.80731	20.2924	62.2425	NA	NA	NA	NA	NA	NA	NA	NA	chr12	9322350	9322549	53525
chr18	12308069	12326568	18500	+	ENSG00000176014	TUBB6	217.056	197.927	245.846	126.364	chr18	12308550	12308749	481	chr18	12278350	12278549	29719	chr18	12296800	12296999	11269
chr17	74307013	74383941	76929	+	ENSG00000176170	SPHK1	11.0374	15.2667	21.1587	9.53761	chr17	74349800	74349999	42787	chr17	74312150	74312349	5137	NA	NA	NA	NA
chr17	30819627	31205655	386029	-	ENSG00000176658	MYO1D	32.2183	37.4891	40.1219	71.1919	chr17	31203650	31203849	2005	NA	NA	NA	NA	chr17	31145800	31145999	59855
chr11	27528384	27899195	370812	-	ENSG00000176697	BDNF	1.13138	2.84529	1.38508	1.0056	NA	NA	NA	NA	NA	NA	NA	NA	NA	NA	NA	NA
chr8	124780695	124827692	46998	+	ENSG00000176853	FAM91A1	52.6216	66.7258	65.4618	101.107	NA	NA	NA	NA	NA	NA	NA	NA	NA	NA	NA	NA
chr8	40010988	40012821	1834	+	ENSG00000176907	C8orf4	84.2138	136.683	45.4927	92.9248	NA	NA	NA	NA	NA	NA	NA	NA	NA	NA	NA	NA
chr8	119201697	119634234	432538	-	ENSG00000177570	SAMD12	1.61512	1.51409	0.189887	2.58649	NA	NA	NA	NA	NA	NA	NA	NA	NA	NA	NA	NA
chr7	1191706	1204903	13198	-	ENSG00000178381	ZFAND2A	20.0967	25.8981	30.8209	11.8429	NA	NA	NA	NA	NA	NA	NA	NA	chr7	1125600	1125799	79303
chr13	77454311	77460540	6230	-	ENSG00000178695	KCTD12	45.3638	45.1692	26.8006	28.961	chr13	77460850	77461049	310	chr13	77459700	77459899	840	chr13	77453050	77453249	7490
chr12	12878850	12982915	104066	+	ENSG00000178878	APOLD1	2.40722	23.0738	2.96811	2.51114	chr12	12869700	12869899	9150	chr12	12877800	12877999	1050	NA	NA	NA	NA
chr17	8043808	8066864	23057	-	ENSG00000179094	PER1	2.31571	14.5487	4.94033	2.67668	chr17	8059550	8059749	7314	chr17	8065850	8066049	1014	NA	NA	NA	NA
chr7	150211917	150218161	6245	+	ENSG00000179144	GIMAP7	42.5406	13.8577	22.5165	34.2811	NA	NA	NA	NA	chr7	150212150	150212349	233	chr7	150284400	150284599	72483
chr8	22545171	22941132	395962	-	ENSG00000179388	EGR3	0.153159	48.2016	2.52459	0.83546	chr8	22926200	22926399	14932	chr8	22976850	22977049	35718	chr8	23008550	23008749	67418
chr11	35639734	35642419	2686	+	ENSG00000179431	FJX1	8.52894	16.195	5.59508	7.66652	chr11	35641050	35641249	1316	chr11	35640050	35640249	316	NA	NA	NA	NA
chr19	54357834	54379691	21858	+	ENSG00000179820	MYADM	57.5777	77.9621	115.357	74.4339	chr19	54345950	54346149	11884	NA	NA	NA	NA	NA	NA	NA	NA
chr8	144898513	144912029	13517	-	ENSG00000179950	PUF60	73.6981	67.7251	84.0076	56.3706	chr8	145010100	145010299	98071	chr8	144911050	144911249	979	NA	NA	NA	NA
chr3	56591188	56717265	126078	+	ENSG00000180376	CCDC66	11.5404	4.67997	7.81368	8.16695	NA	NA	NA	NA	NA	NA	NA	NA	NA	NA	NA	NA
chr2	47126413	47403740	277328	-	ENSG00000180398	MCFD2	161.841	156.501	159.1	95.0562	NA	NA	NA	NA	chr2	47403700	47403899	40	chr2	47497350	47497549	93610
chr1	231154703	231175992	21290	-	ENSG00000182118	FAM89A	22.7101	25.8142	12.4676	32.7537	NA	NA	NA	NA	chr1	231175300	231175499	692	chr1	231177200	231177399	1208
chr8	118806728	119124092	317365	-	ENSG00000182197	EXT1	51.5358	56.8286	107.134	61.7524	NA	NA	NA	NA	chr8	119112900	119113099	11192	chr8	119097950	119098149	26142
chr15	99192199	99675798	483600	+	ENSG00000182253	SYNM	7.18661	8.67765	16.7265	15.0355	NA	NA	NA	NA	chr15	99192400	99192599	201	chr15	99215200	99215399	23001
chr22	29655840	29696515	40676	+	ENSG00000182944	EWSR1	190.471	206.665	230.86	170.277	chr22	29706300	29706499	50460	chr22	29664000	29664199	8160	NA	NA	NA	NA
chr8	144718182	144738588	20407	+	ENSG00000183309	ZNF623	5.02969	2.44097	5.19239	5.5107	chr8	144679200	144679399	38982	chr8	144781250	144781449	63068	NA	NA	NA	NA
chr15	51329684	51630807	301124	-	ENSG00000183578	TNFAIP8L3	16.4067	45.7175	26.5913	18.8955	NA	NA	NA	NA	NA	NA	NA	NA	NA	NA	NA	NA
chr7	48128224	48148330	20107	+	ENSG00000183696	UPP1	14.1442	24.2942	19.8171	12.8232	chr7	48127500	48127699	724	NA	NA	NA	NA	NA	NA	NA	NA
chr22	30279143	31530682	1251540	+	ENSG00000183963	SMTN	60.1921	50.6368	57.9358	33.7036	NA	NA	NA	NA	NA	NA	NA	NA	chr22	30239000	30239199	40143
chr22	19510546	19515068	4523	-	ENSG00000184113	CLDN5	79.3507	75.6304	38.2929	35.4509	chr22	19515400	19515599	332	chr22	19509100	19509299	5968	NA	NA	NA	NA
chr22	50295450	50321188	25739	+	ENSG00000184164	CRELD2	19.826	20.9294	37.0413	34.348	chr22	50328350	50328549	32900	chr22	50328050	50328249	32600	NA	NA	NA	NA
chrX	53111548	53117722	6175	+	ENSG00000184205	TSPYL2	12.108	25.1136	26.4545	14.7751	chrX	53112000	53112199	452	chrX	53077700	53077899	33848	NA	NA	NA	NA
chr8	25316512	25365436	48925	+	ENSG00000184661	CDCA2	23.0455	20.2032	31.541	14.3893	NA	NA	NA	NA	chr8	25316800	25316999	288	NA	NA	NA	NA
chr22	31795508	32058418	262911	-	ENSG00000184708	EIF4ENIF1	30.644	14.6168	25.5492	21.4406	chr22	32058850	32059049	432	NA	NA	NA	NA	chr22	32112200	32112399	53782
chr14	105219436	105234831	15396	+	ENSG00000184990	SIVA1	55.276	58.4908	68.727	34.2431	chr14	105220000	105220199	564	chr14	105155000	105155199	64436	NA	NA	NA	NA
chr22	38597888	38612518	14631	+	ENSG00000185022	MAFF	21.2622	93.5443	32.9758	23.0526	chr22	38599500	38599699	1612	chr22	38573550	38573749	24338	chr22	38582750	38582949	15138
chr14	85996487	86095034	98548	+	ENSG00000185070	FLRT2	109.83	126.027	66.4377	47.6805	NA	NA	NA	NA	chr14	86000000	86000199	3513	chr14	85994250	85994449	2237
chr5	61601988	61924409	322422	+	ENSG00000186105	LRRC70	6.35083	13.6849	6.13201	6.61243	chr5	61602550	61602749	562	NA	NA	NA	NA	chr5	61558350	61558549	43638
chr16	56716335	56718108	1774	+	ENSG00000187193	MT1X	29.4801	39.4057	71.7883	17.6337	chr16	56643150	56643349	73185	NA	NA	NA	NA	chr16	56650450	56650649	65885
chr2	232571604	232578251	6648	+	ENSG00000187514	PTMA	1522.31	1321.65	1785.54	1264.97	chr2	232571400	232571599	204	chr2	232573450	232573649	1846	NA	NA	NA	NA
chr5	141689991	142077617	387627	-	ENSG00000187678	SPRY4	20.0963	93.2842	52.2649	49.7726	NA	NA	NA	NA	NA	NA	NA	NA	chr5	142092550	142092749	14933
chr1	40942886	40974333	31448	+	ENSG00000187815	ZNF642	0.898746	0.130198	1.40732	0.751451	chr1	40915950	40916149	26936	NA	NA	NA	NA	NA	NA	NA	NA
chr2	235401684	235405697	4014	-	ENSG00000188042	ARL4C	7.25302	14.9229	12.3468	12.8336	chr2	235354200	235354399	51497	chr2	235405350	235405549	347	NA	NA	NA	NA
chr1	244998623	245027844	29222	-	ENSG00000188206	HNRNPU-AS1	3.99744	5.19185	1.36466	17.7215	chr1	245026650	245026849	1194	NA	NA	NA	NA	NA	NA	NA	NA
chr20	20370195	20693266	323072	-	ENSG00000188559	RALGAPA2	28.7349	32.0584	61.7627	42.3492	NA	NA	NA	NA	chr20	20782800	20782999	89534	chr20	20712950	20713149	19684
chr17	73131342	73150778	19437	-	ENSG00000189159	HN1	742.486	636.861	679.603	434.614	chr17	73120300	73120499	30478	NA	NA	NA	NA	NA	NA	NA	NA
chr6	28292469	28335336	42868	+	ENSG00000189298	ZKSCAN3	2.37302	0.642184	2.71981	2.42497	chr6	28219550	28219749	72919	chr6	28213250	28213449	79219	NA	NA	NA	NA
chr6	30687977	30693203	5227	+	ENSG00000196230	TUBB	1390.97	1315.59	1225.4	762.249	chr6	30689900	30690099	1923	chr6	30716900	30717099	28923	NA	NA	NA	NA
chr1	207494852	207534311	39460	+	ENSG00000196352	CD55	72.5	94.7731	172.544	198.795	chr1	207495150	207495349	298	NA	NA	NA	NA	chr1	207482700	207482899	12152
chr3	150126079	150177903	51825	+	ENSG00000196428	TSC22D2	29.0866	56.0227	23.0174	24.2042	chr3	150127350	150127549	1271	NA	NA	NA	NA	chr3	150125200	150125399	879
chr2	97202479	97218375	15897	+	ENSG00000196843	ARID5A	11.39	29.9013	18.3346	12.6634	chr2	97202650	97202849	171	NA	NA	NA	NA	chr2	97198900	97199099	3579
chr2	196440700	196602426	161727	+	ENSG00000196950	SLC39A10	22.8944	17.2773	16.3011	29.2586	NA	NA	NA	NA	NA	NA	NA	NA	NA	NA	NA	NA
chr1	89990394	90402170	411777	+	ENSG00000197147	LRRC8B	13.1552	17.7891	42.8012	25.8525	NA	NA	NA	NA	NA	NA	NA	NA	chr1	90004650	90004849	14256
chr19	52494587	52511483	16897	-	ENSG00000197619	ZNF615	1.36495	0.36695	1.79175	1.80652	chr19	52551600	52551799	40117	chr19	52489250	52489449	22233	NA	NA	NA	NA
chr2	108994366	109004513	10148	+	ENSG00000198075	SULT1C4	14.6656	39.5248	61.0332	51.5246	NA	NA	NA	NA	NA	NA	NA	NA	chr2	108995700	108995899	1334
chr5	128795251	129522327	727077	+	ENSG00000198108	CHSY3	1.9304	1.40776	7.13454	2.95559	NA	NA	NA	NA	NA	NA	NA	NA	NA	NA	NA	NA
chr2	69546904	69614382	67479	-	ENSG00000198380	GFPT1	18.2115	20.1388	36.3991	26.0584	chr2	69614100	69614299	282	NA	NA	NA	NA	NA	NA	NA	NA
chr7	1570349	1582679	12331	+	ENSG00000198517	MAFK	8.32039	25.2457	11.9574	11.2567	chr7	1572900	1573099	2551	NA	NA	NA	NA	NA	NA	NA	NA
chr11	57480071	57587018	106948	+	ENSG00000198561	CTNND1	146.817	163.221	130.013	162.121	chr11	57435850	57436049	44221	chr11	57509200	57509399	29129	chr11	57538900	57539099	58829
chr6	31496493	31527677	31185	-	ENSG00000198563	DDX39B	357.982	345.068	346.519	246.673	chr6	31529150	31529349	1473	chr6	31526050	31526249	1627	NA	NA	NA	NA
chr14	90862845	90874605	11761	+	ENSG00000198668	CALM1	523.412	553.865	561.856	868.39	chr14	90863500	90863699	655	chr14	90883900	90884099	21055	chr14	90896050	90896249	33205
chr6	90036343	90062567	26225	-	ENSG00000198833	UBE2J1	112.066	129.103	217.451	206.768	chr6	90062350	90062549	217	NA	NA	NA	NA	chr6	90067500	90067699	4933
chr15	91509269	91538859	29591	-	ENSG00000198901	PRC1	229.289	192.831	189.153	124.907	chr15	91498700	91498899	40159	chr15	91537250	91537449	1609	NA	NA	NA	NA
chr2	132905163	133015542	110380	-	ENSG00000202174	RN5-8S5	0	209.931	0	0	NA	NA	NA	NA	NA	NA	NA	NA	NA	NA	NA	NA
chr6	52860417	52860748	332	+	ENSG00000202198	RN7SK	168.032	257.541	69.7642	45.8727	NA	NA	NA	NA	NA	NA	NA	NA	NA	NA	NA	NA
chr1	155579338	155829191	249854	+	ENSG00000203761	RP11-243J18.3	11.3136	13.7066	23.9783	8.37748	chr1	155532600	155532799	46738	chr1	155658650	155658849	79312	NA	NA	NA	NA
chr6	31777395	31785723	8329	+	ENSG00000204389	HSPA1A	27.1849	15.6316	22.8063	24.8316	chr6	31781950	31782149	4555	NA	NA	NA	NA	NA	NA	NA	NA
chr6	30539152	30564956	25805	+	ENSG00000204574	ABCF1	99.5917	100.461	119.103	75.4474	chr6	30523000	30523199	16152	chr6	30457800	30457999	81352	chr6	30583350	30583549	44198
chr5	180663908	180699308	35401	-	ENSG00000204628	GNB2L1	2735.89	2670.52	3073.55	2342.79	chr5	180671500	180671699	27808	NA	NA	NA	NA	NA	NA	NA	NA
chr2	101436613	101886778	450166	-	ENSG00000204634	TBC1D8	10.0266	11.475	21.7543	14.1033	NA	NA	NA	NA	NA	NA	NA	NA	NA	NA	NA	NA
chr11	27387507	27503980	116474	-	ENSG00000205213	LGR4	1.44556	4.99707	1.39795	4.80746	NA	NA	NA	NA	NA	NA	NA	NA	chr11	27503000	27503199	980
chr7	142498724	142500432	1709	+	ENSG00000211772	TRBC2	135.421	100.706	98.2893	30.1044	NA	NA	NA	NA	chr7	142496250	142496449	2474	NA	NA	NA	NA
chr11	71991194	71992222	1029	+	ENSG00000213365	AP000593.6	43.222	34.1423	57.9578	20.8993	chr11	71935150	71935349	56044	NA	NA	NA	NA	NA	NA	NA	NA
chr2	30454396	30546596	92201	+	ENSG00000213626	LBH	2.62341	4.33152	18.3882	8.43564	chr2	30370150	30370349	84246	NA	NA	NA	NA	NA	NA	NA	NA
chr22	19744225	19842462	98238	-	ENSG00000215012	C22orf29	9.75772	4.07155	7.92188	8.55509	chr22	19842950	19843149	488	chr22	19831800	19831999	10662	NA	NA	NA	NA
chr5	130759613	131132756	373144	-	ENSG00000217128	FNIP1	5.22318	9.78191	7.22973	8.10826	chr5	131132400	131132599	356	NA	NA	NA	NA	NA	NA	NA	NA
chr11	61567097	61659523	92427	-	ENSG00000221968	FADS3	116.164	102.664	137.565	81.601	chr11	61595050	61595249	64473	chr11	61658000	61658199	1523	chr11	61587850	61588049	71673
chr9	130577290	130617035	39746	+	ENSG00000225032	RP11-228B15.4	3.55478	0.749705	2.17755	2.21699	chr9	130590900	130591099	13610	chr9	130589750	130589949	12460	NA	NA	NA	NA
chr3	48663155	48672926	9772	-	ENSG00000225697	SLC26A6	16.9826	12.6788	26.4397	24.3113	chr3	48700850	48701049	27924	NA	NA	NA	NA	chr3	48673650	48673849	724
chrY	10036112	10036711	600	-	ENSG00000225840	RN18S1	44.4415	203.167	67.9035	45.4221	NA	NA	NA	NA	NA	NA	NA	NA	NA	NA	NA	NA
chr9	123605377	123616651	11275	+	ENSG00000226752	RP11-27I1.2	6.80184	5.16605	11.6568	8.58838	chr9	123638350	123638549	32973	chr9	123639350	123639549	33973	chr9	123609750	123609949	4373
chr14	96505660	96560417	54758	+	ENSG00000227051	C14orf132	0.391482	0.338732	1.43497	0.114389	NA	NA	NA	NA	NA	NA	NA	NA	NA	NA	NA	NA
chr1	179068461	179198819	130359	+	ENSG00000228449	RP11-177A2.4	0	2.31573	0	2.18034	NA	NA	NA	NA	chr1	179132450	179132649	63989	chr1	179111050	179111249	42589
chr6	74405257	74538040	132784	-	ENSG00000231652	RP11-553A21.3	8.74764	18.7592	47.626	0	NA	NA	NA	NA	NA	NA	NA	NA	chr6	74514450	74514649	23590
chr1	201592410	201853422	261013	-	ENSG00000231871	RP11-90L20.3	1.28566	7.81653	3.09404	6.5118	chr1	201924650	201924849	71228	chr1	201828750	201828949	24672	chr1	201819200	201819399	34222
chr5	54104037	54168379	64343	-	ENSG00000232517	AC112198.1	0.373153	0.249191	1.12877	1.18751	NA	NA	NA	NA	NA	NA	NA	NA	chr5	54170400	54170599	2021
chr2	191745522	191885686	140165	-	ENSG00000235852	AC005540.3	4.67467	2.08655	6.93986	0	NA	NA	NA	NA	chr2	191884650	191884849	1036	chr2	191848950	191849149	36736
chr2	118591512	118599234	7723	+	ENSG00000236255	AC009404.2	0.257258	4.93503	1.74797	0.945145	NA	NA	NA	NA	NA	NA	NA	NA	NA	NA	NA	NA
chr7	135611202	135662101	50900	+	ENSG00000236338	AC015987.1	30.9049	23.9688	53.3516	64.7167	NA	NA	NA	NA	chr7	135586450	135586649	24752	chr7	135665200	135665399	53998
chr6	33246884	33267176	20293	-	ENSG00000237441	RGL2	42.5624	34.7369	49.6535	39.174	chr6	33266450	33266649	726	chr6	33245000	33245199	22176	chr6	33240800	33240999	26376
chrX	56755676	56844813	89138	-	ENSG00000237748	UQCRBP1	40.2852	29.5936	189.593	46.8035	NA	NA	NA	NA	NA	NA	NA	NA	NA	NA	NA	NA
chr7	80962916	80963147	232	+	ENSG00000239843	AC004866.1	38.6388	160.49	54.9663	49.135	NA	NA	NA	NA	NA	NA	NA	NA	chr7	80960250	80960449	2666
chr12	20514665	20837315	322651	+	ENSG00000240831	AC112777.1	4201.16	13858	4879.99	4921.97	chr12	20522200	20522399	7535	NA	NA	NA	NA	chr12	20591050	20591249	76385
chr3	9791627	9896822	105196	+	ENSG00000241553	ARPC4	406.669	444.165	360.888	514.679	chr3	9773600	9773799	18027	chr3	9879100	9879299	87473	NA	NA	NA	NA
chr5	93488670	94620279	1131610	-	ENSG00000241988	AC093311.4	6106.43	22491.4	32099.8	44366.1	NA	NA	NA	NA	NA	NA	NA	NA	chr5	94553050	94553249	67229
chr12	73605191	74335956	730766	+	ENSG00000243164	RP11-166B14.1	11.272	15.102	5.19468	31.9855	NA	NA	NA	NA	NA	NA	NA	NA	NA	NA	NA	NA
chr3	185764096	186080026	315931	-	ENSG00000244405	ETV5	29.7604	29.8728	43.2058	20.4509	NA	NA	NA	NA	NA	NA	NA	NA	NA	NA	NA	NA
chr17	72199720	72209481	9762	-	ENSG00000246731	CTD-2514K5.2	1.7026	0.0841587	0.189067	1.15531	NA	NA	NA	NA	NA	NA	NA	NA	chr17	72232750	72232949	23269
chr19	48706402	48761452	55051	+	ENSG00000247217	AC008392.1	25.2299	34.2023	11.6607	18.7362	chr19	48613250	48613449	93152	chr19	48624400	48624599	82002	chr19	48721650	48721849	15248
chr4	57829535	58071676	242142	-	ENSG00000250610	RP11-738E22.2	64.3929	18.1734	2.60859	271.268	NA	NA	NA	NA	chr4	57976050	57976249	95626	chr4	57997500	57997699	74176
chr5	114914338	114968689	54352	-	ENSG00000251201	TMED7-TICAM2	0.412058	1.0433	4.6057	0.0535082	NA	NA	NA	NA	NA	NA	NA	NA	NA	NA	NA	NA
chr8	23154701	23315208	160508	+	ENSG00000253837	RP11-177H13.2	0.696575	2.71032	1.12623	1.18713	chr8	23173700	23173899	18999	chr8	23210350	23210549	55649	NA	NA	NA	NA
chr5	159678658	159772403	93746	+	ENSG00000254373	RP11-34P1.2	20.7466	14.2769	82.4285	19.5665	chr5	159702200	159702399	23542	chr5	159689100	159689299	10442	NA	NA	NA	NA
chr11	66036003	66056641	20639	-	ENSG00000254452	RP11-867G23.4	4.11552	12.8589	0	10.3076	chr11	66103550	66103749	46909	NA	NA	NA	NA	chr11	66025250	66025449	31391

## Sheet: Legend
Suppl. Table 4. Differentially expressed genes during VEGF stimulation timecourse
Cufflinks was used to identify genes differentially expressed (q-value < 0.05 for at least one time point) between two sequential time points in the VEGF stimulation time course. The nearest dynamic, p300-associated, H3K27ac site within each cluster (H1, H4-12, H0) within 100 kb are indicated. NA indicates no such site within 100 kb of the differentially expressed gene's TSS.
